# Supplementary material for: Multifunctional long-alkyl-chain quaternary ammonium azolate based ionic liquids
Source: Royal Society of Chemistry journal article supplement (doi:10.1039/c0nj00228c), 2010-01-01

### Supporting information - NMR

Didecyldimethylammonium benzotriazolate (**1**)  $^1\text{H}$ NMR

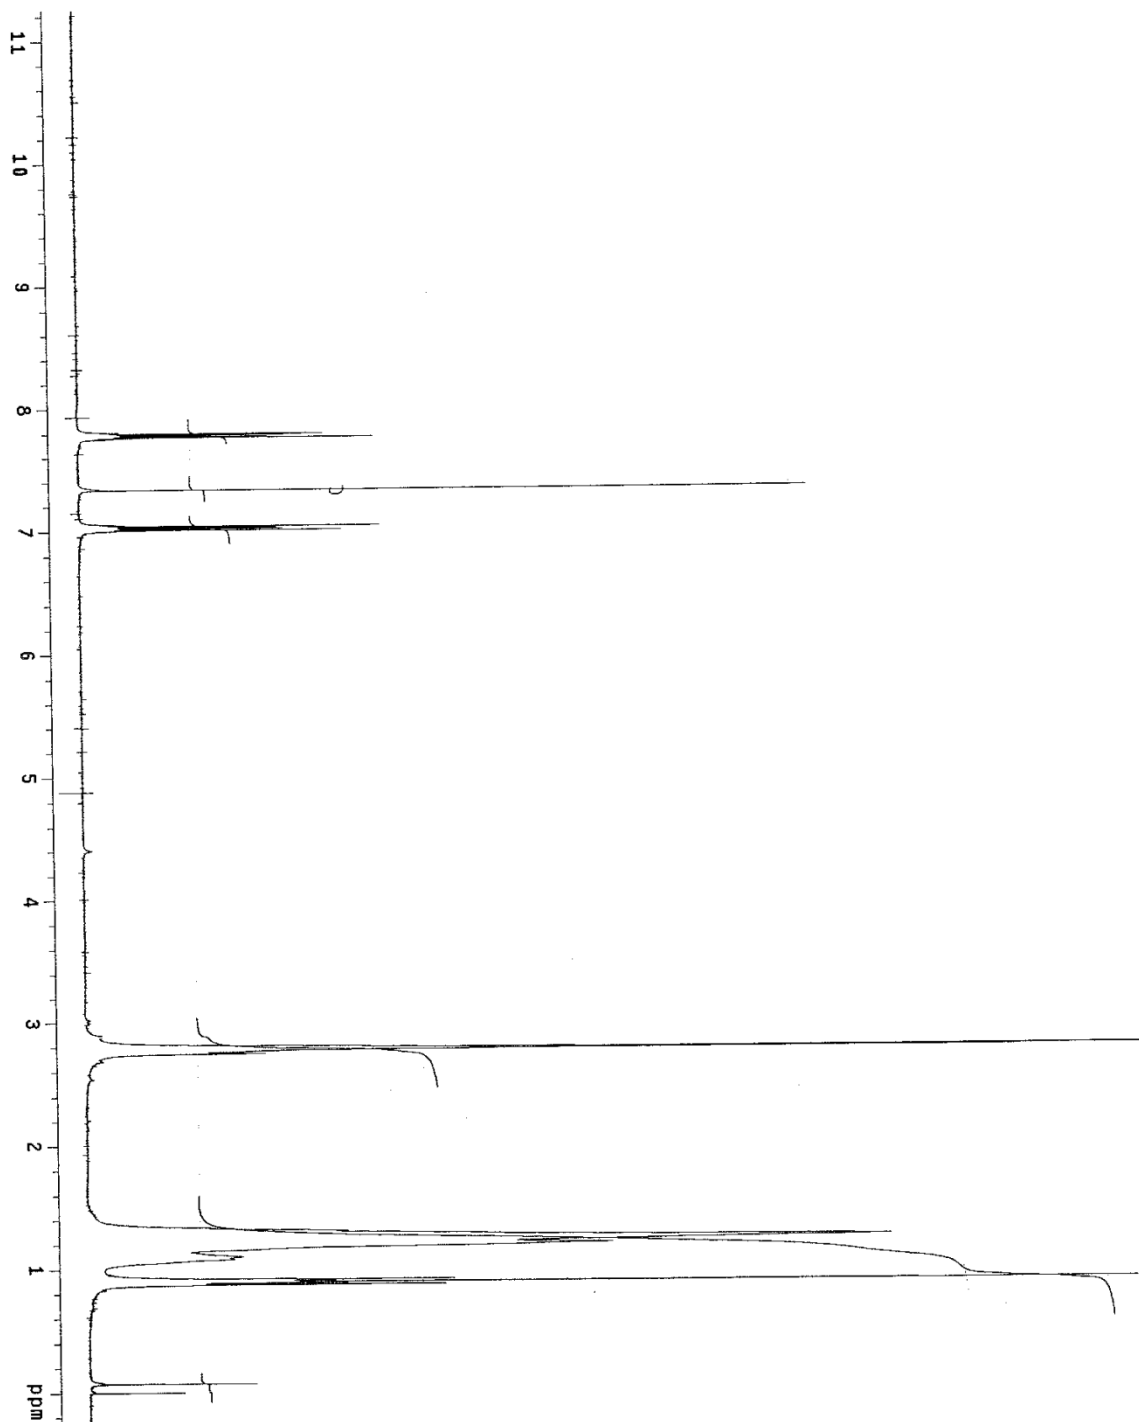

Didecyldimethylammonium 1,2,4-triazolate (2)  $^1\text{H}$ NMR

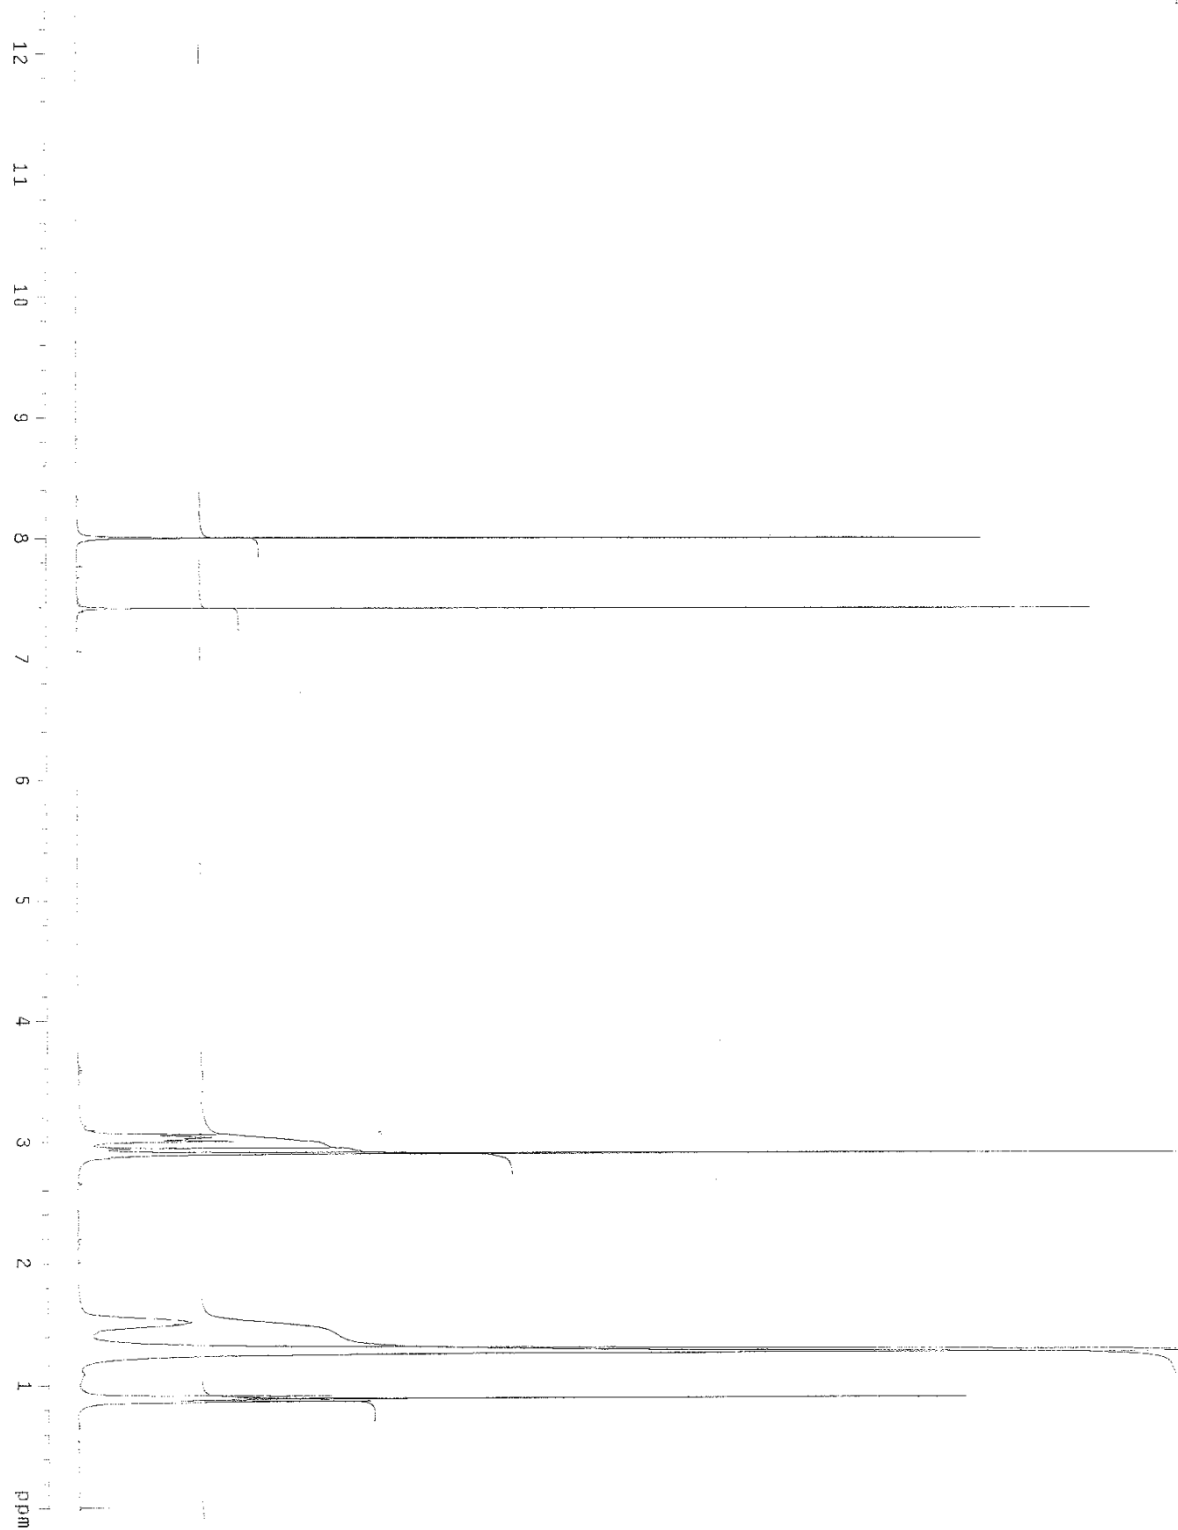

Didecyldimethylammonium 4-nitroimidazolate (3)  $^1\text{H}$ NMR

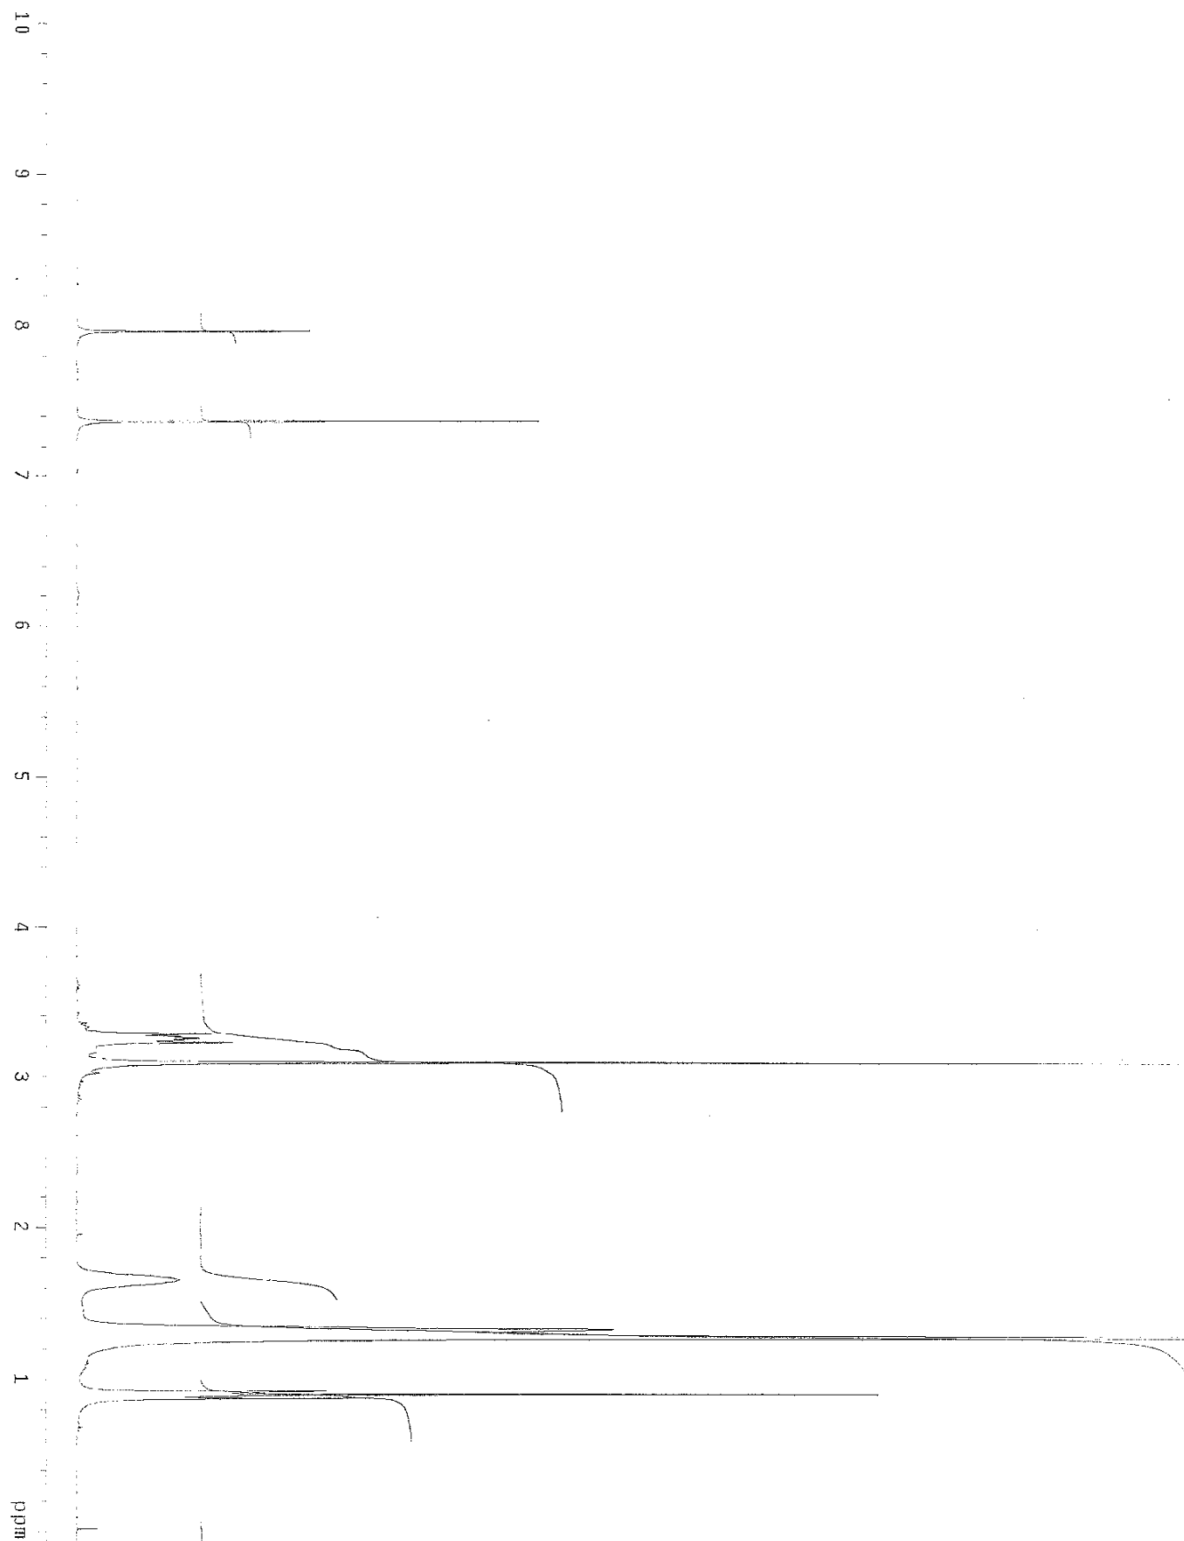

Didecyldimethylammonium 2-methyl-4-nitroimidazole (4) <sup>1</sup>HNMR

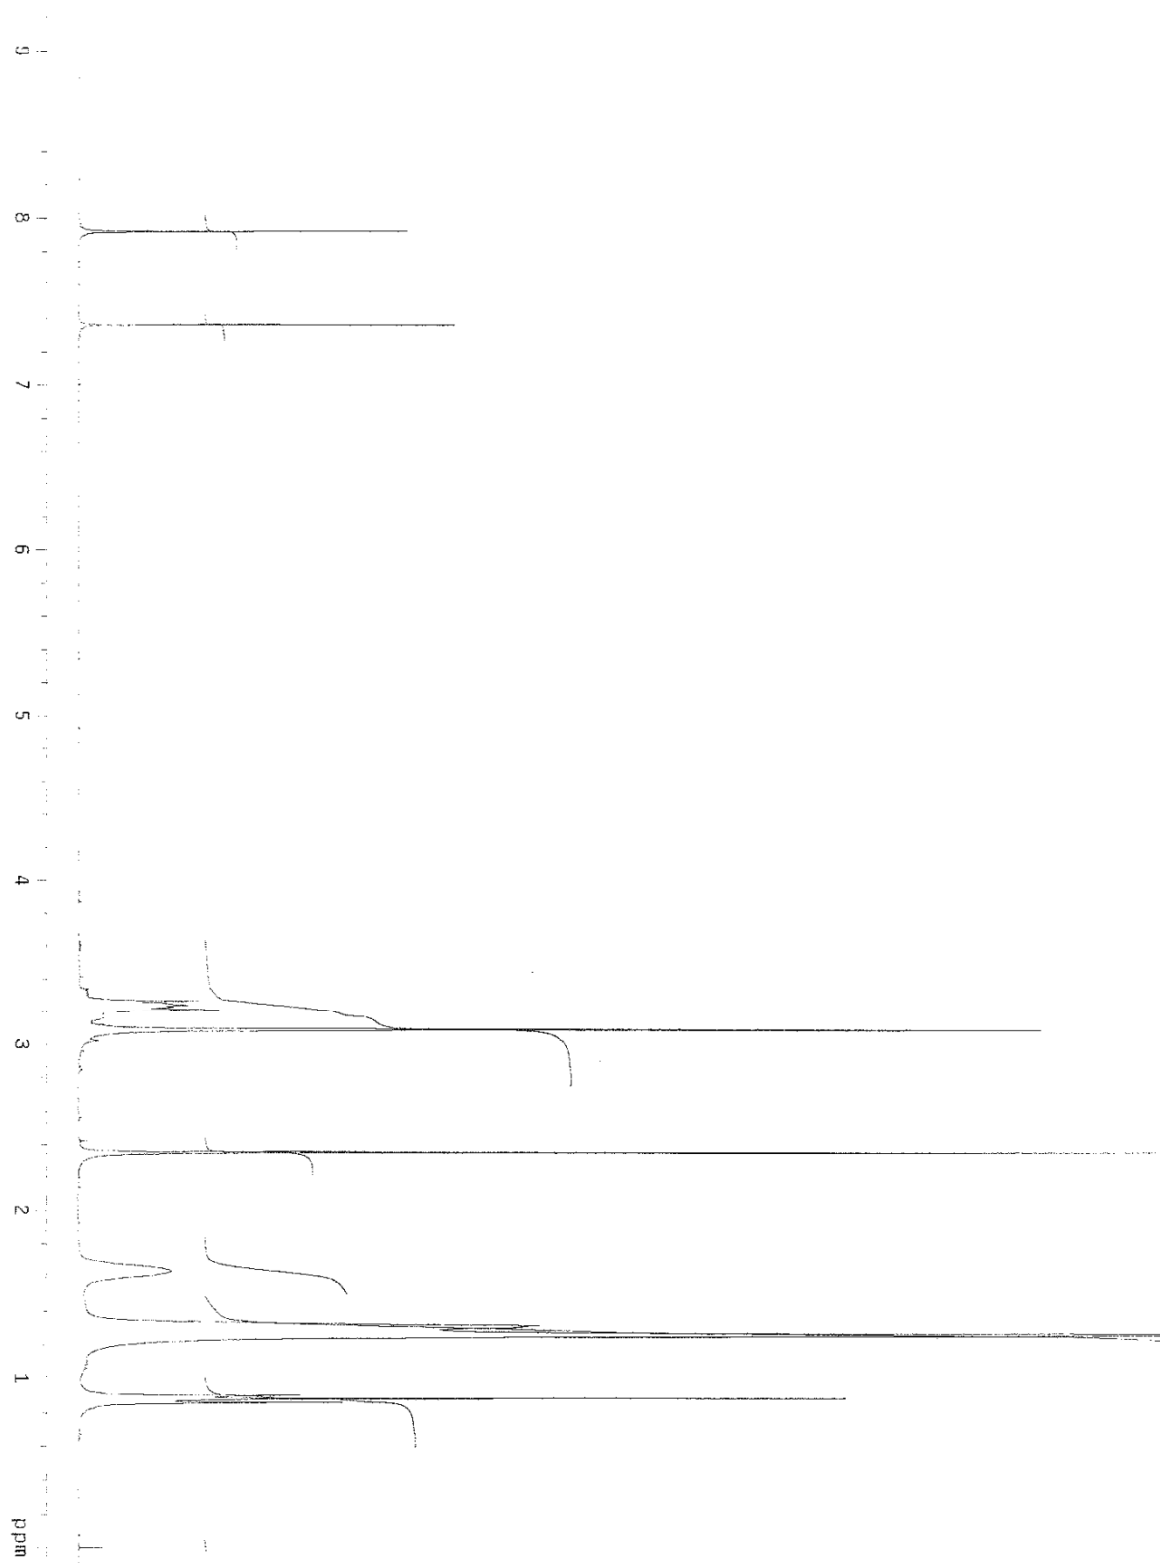

Didecyldimethylammonium benzotriazolate (**1**)  $^{13}\text{C}$ NMR

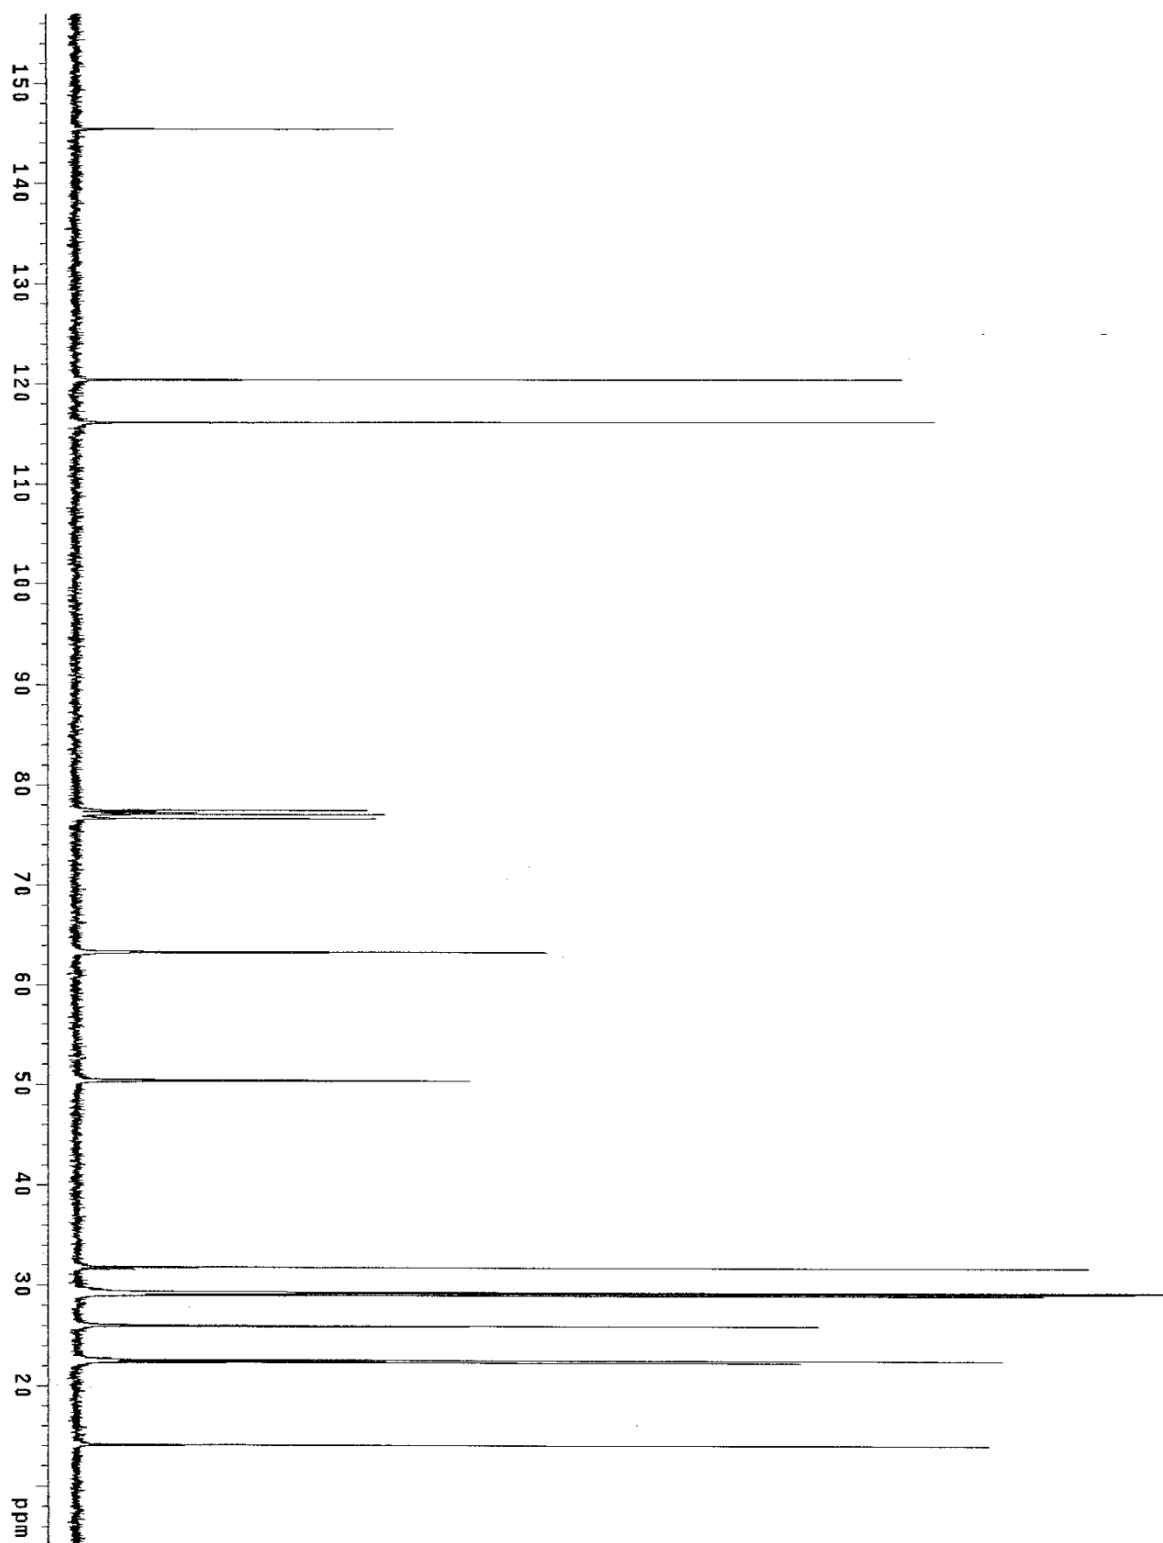

Didecyldimethylammonium 1,2,4-triazolate (2)  $^{13}\text{C}$ NMR

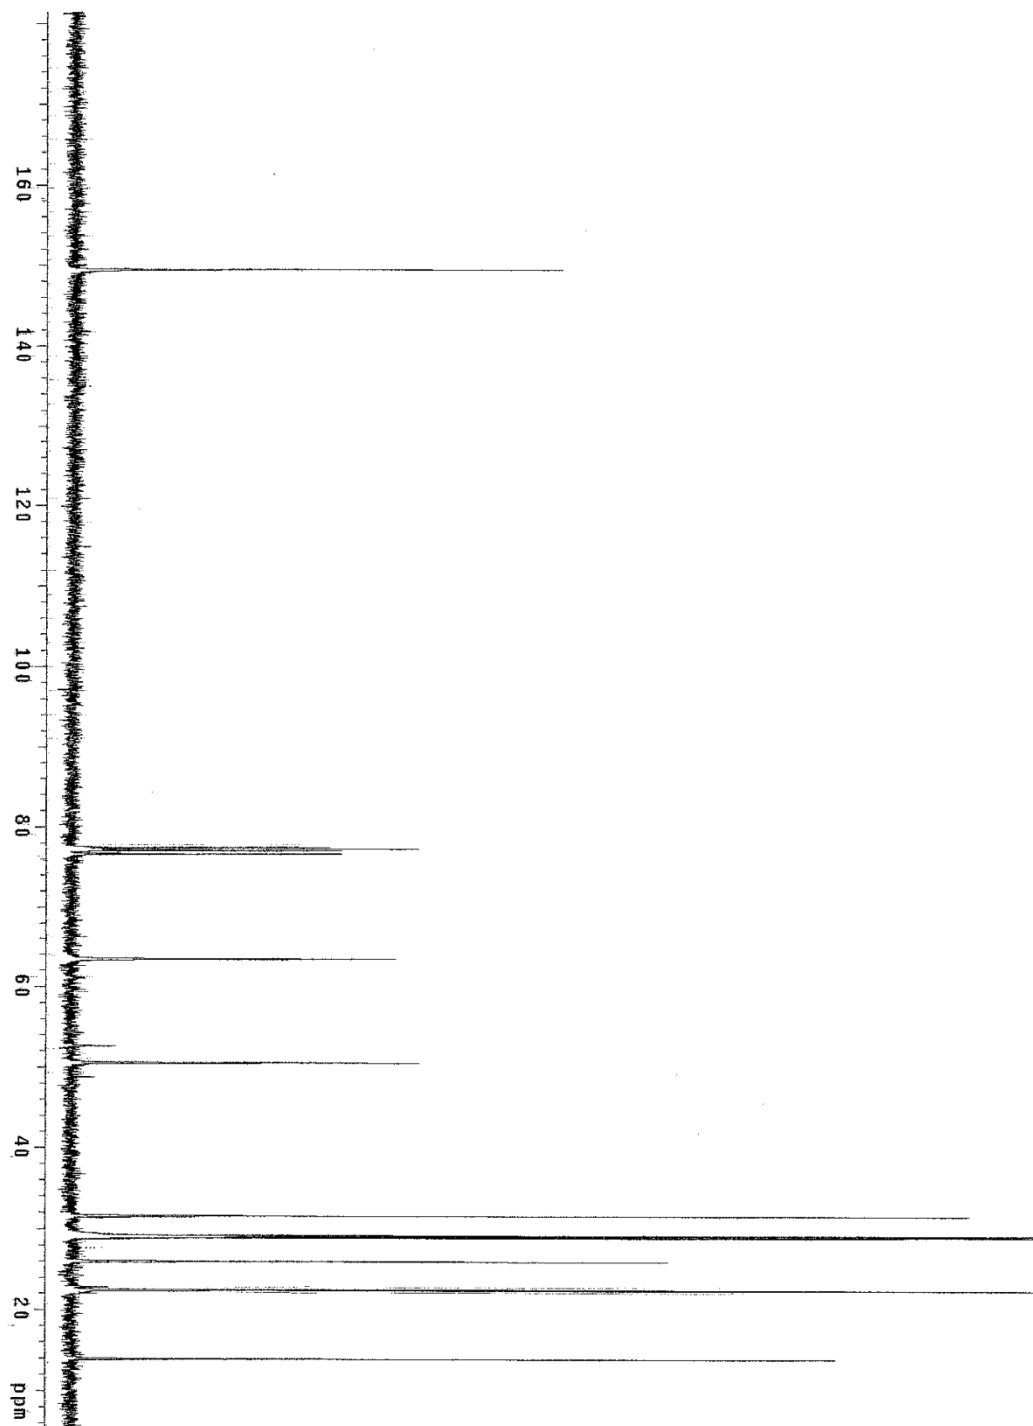

Didecyldimethylammonium 4-nitroimidazolate (3)  $^{13}\text{C}$ NMR

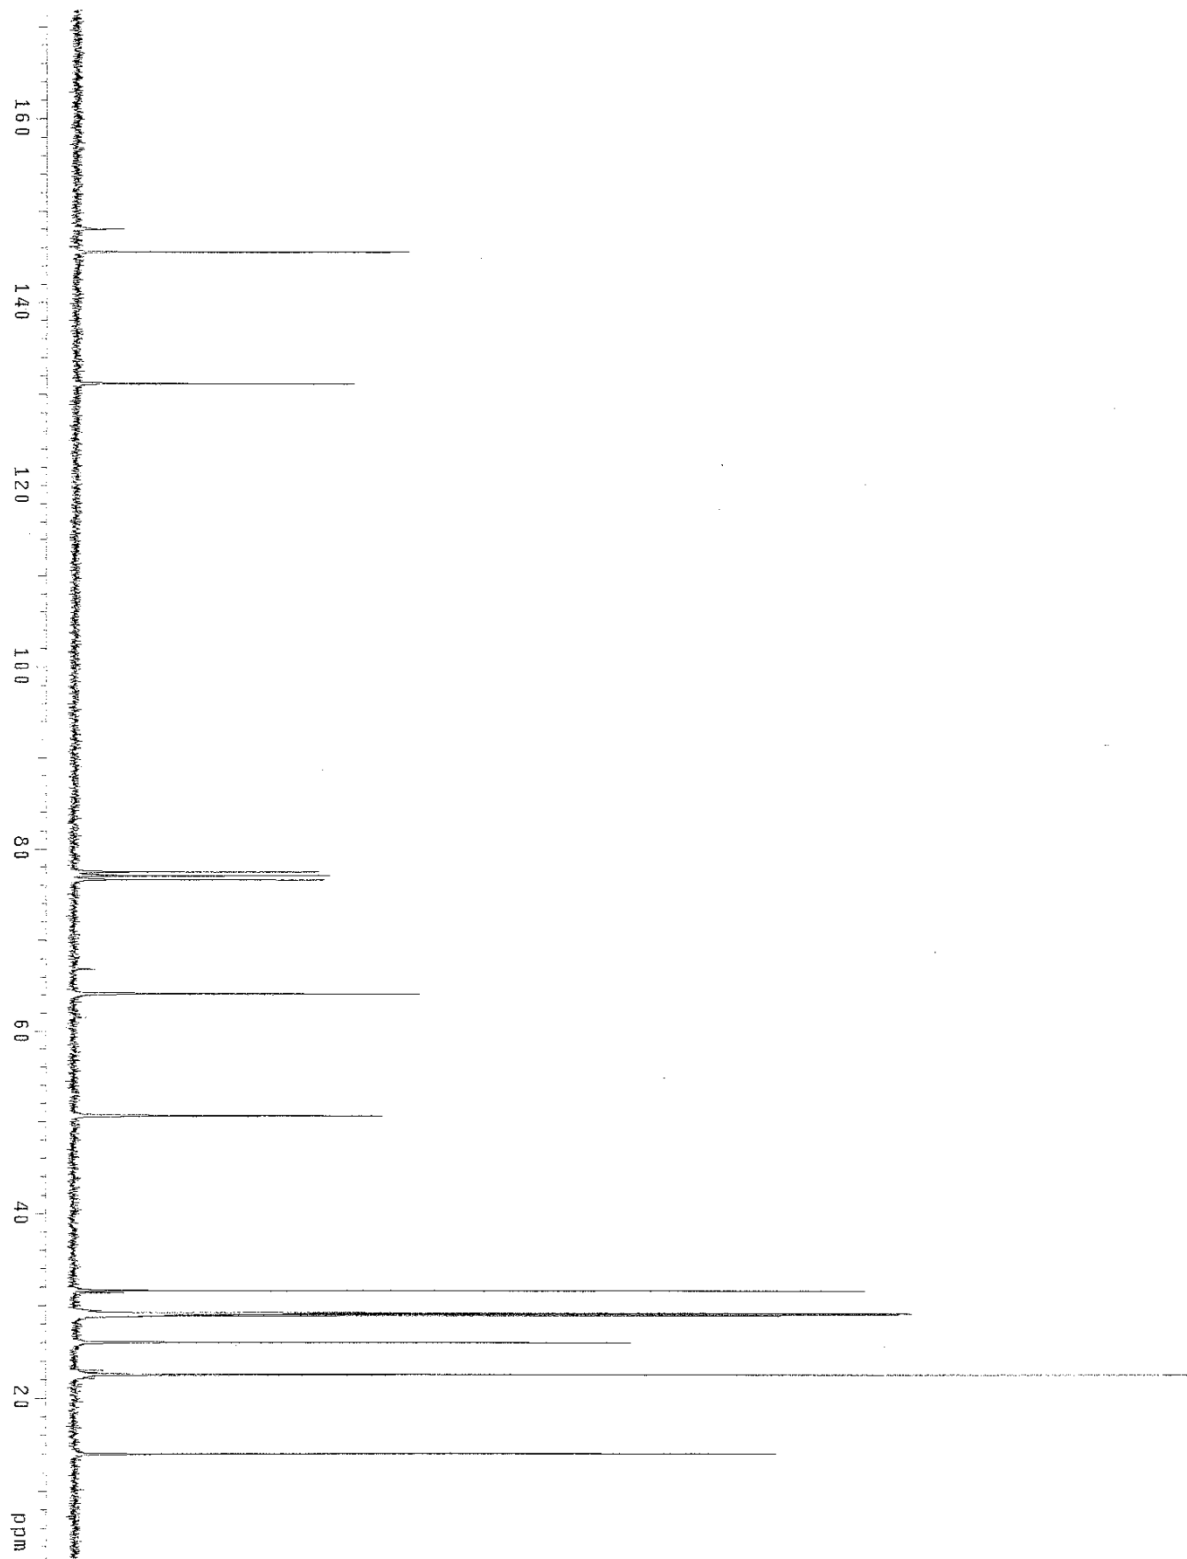

Didecyldimethylammonium 2-methyl-4-nitroimidazole (4)  $^{13}\text{C}$ NMR

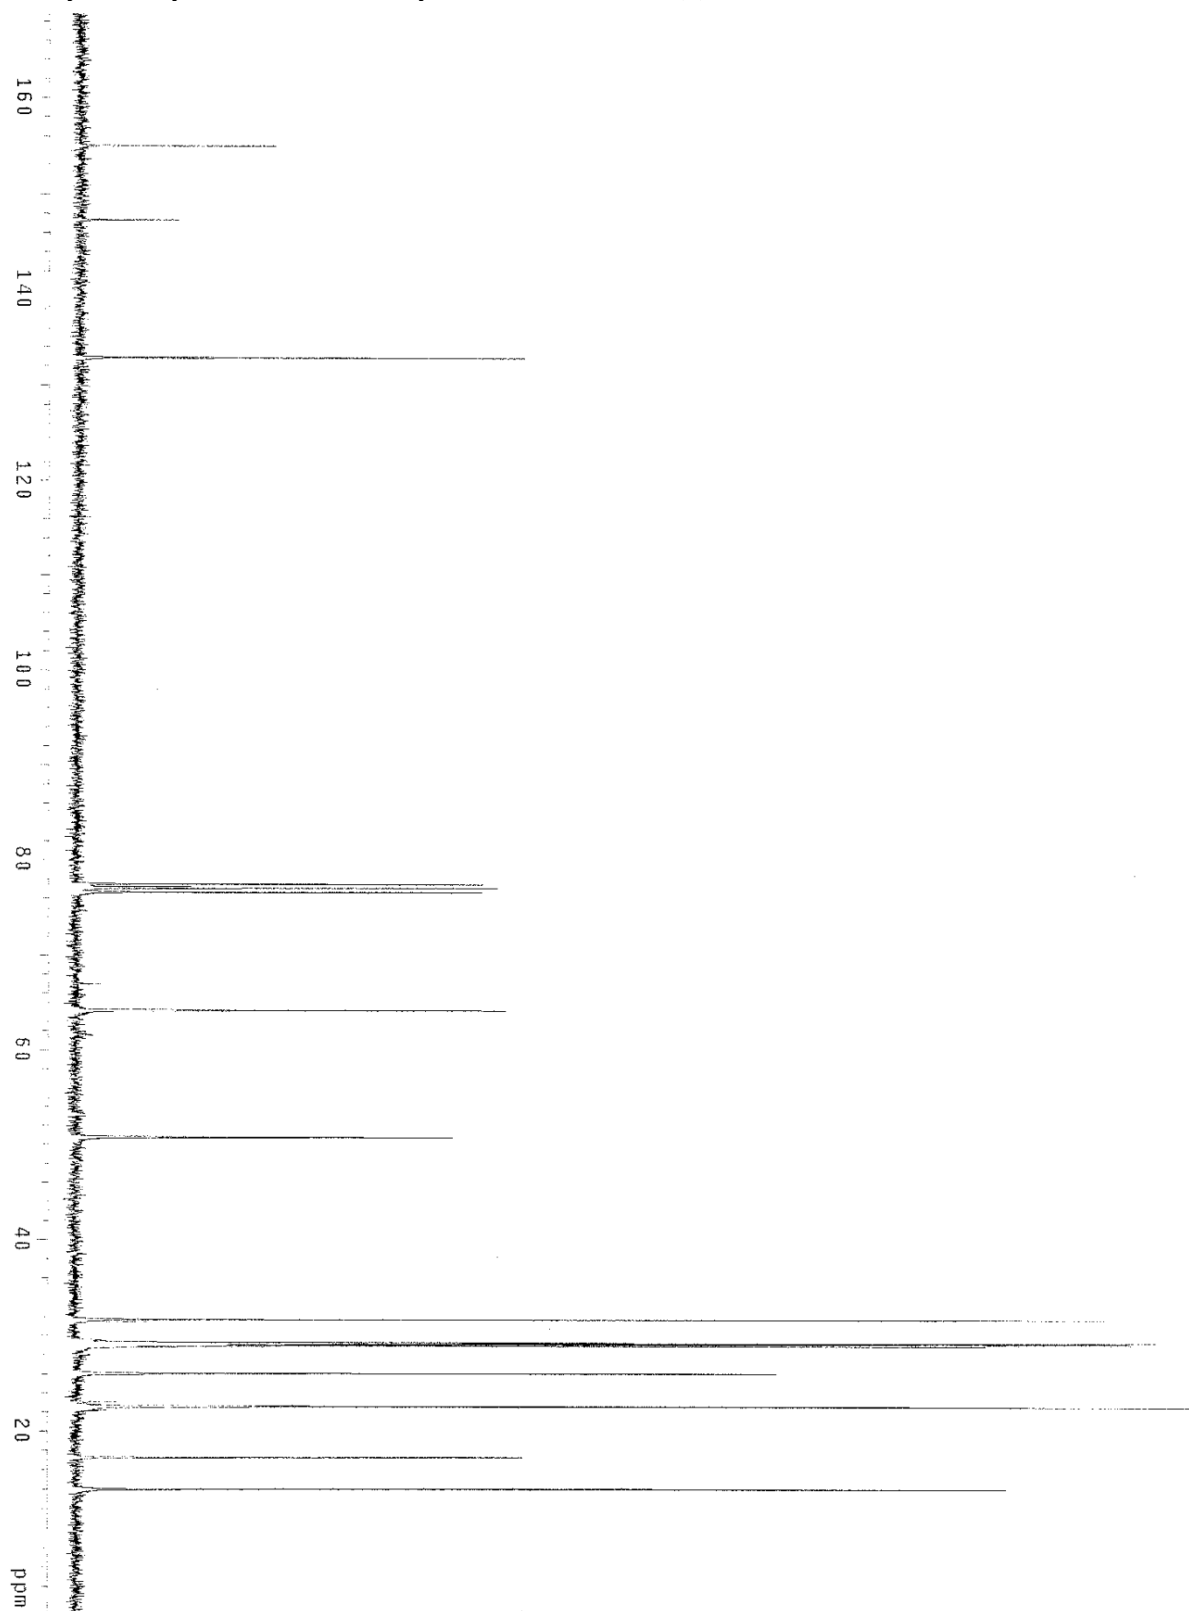



Benzalkonium benzotriazolate (**5**)<sup>1</sup>H NMR

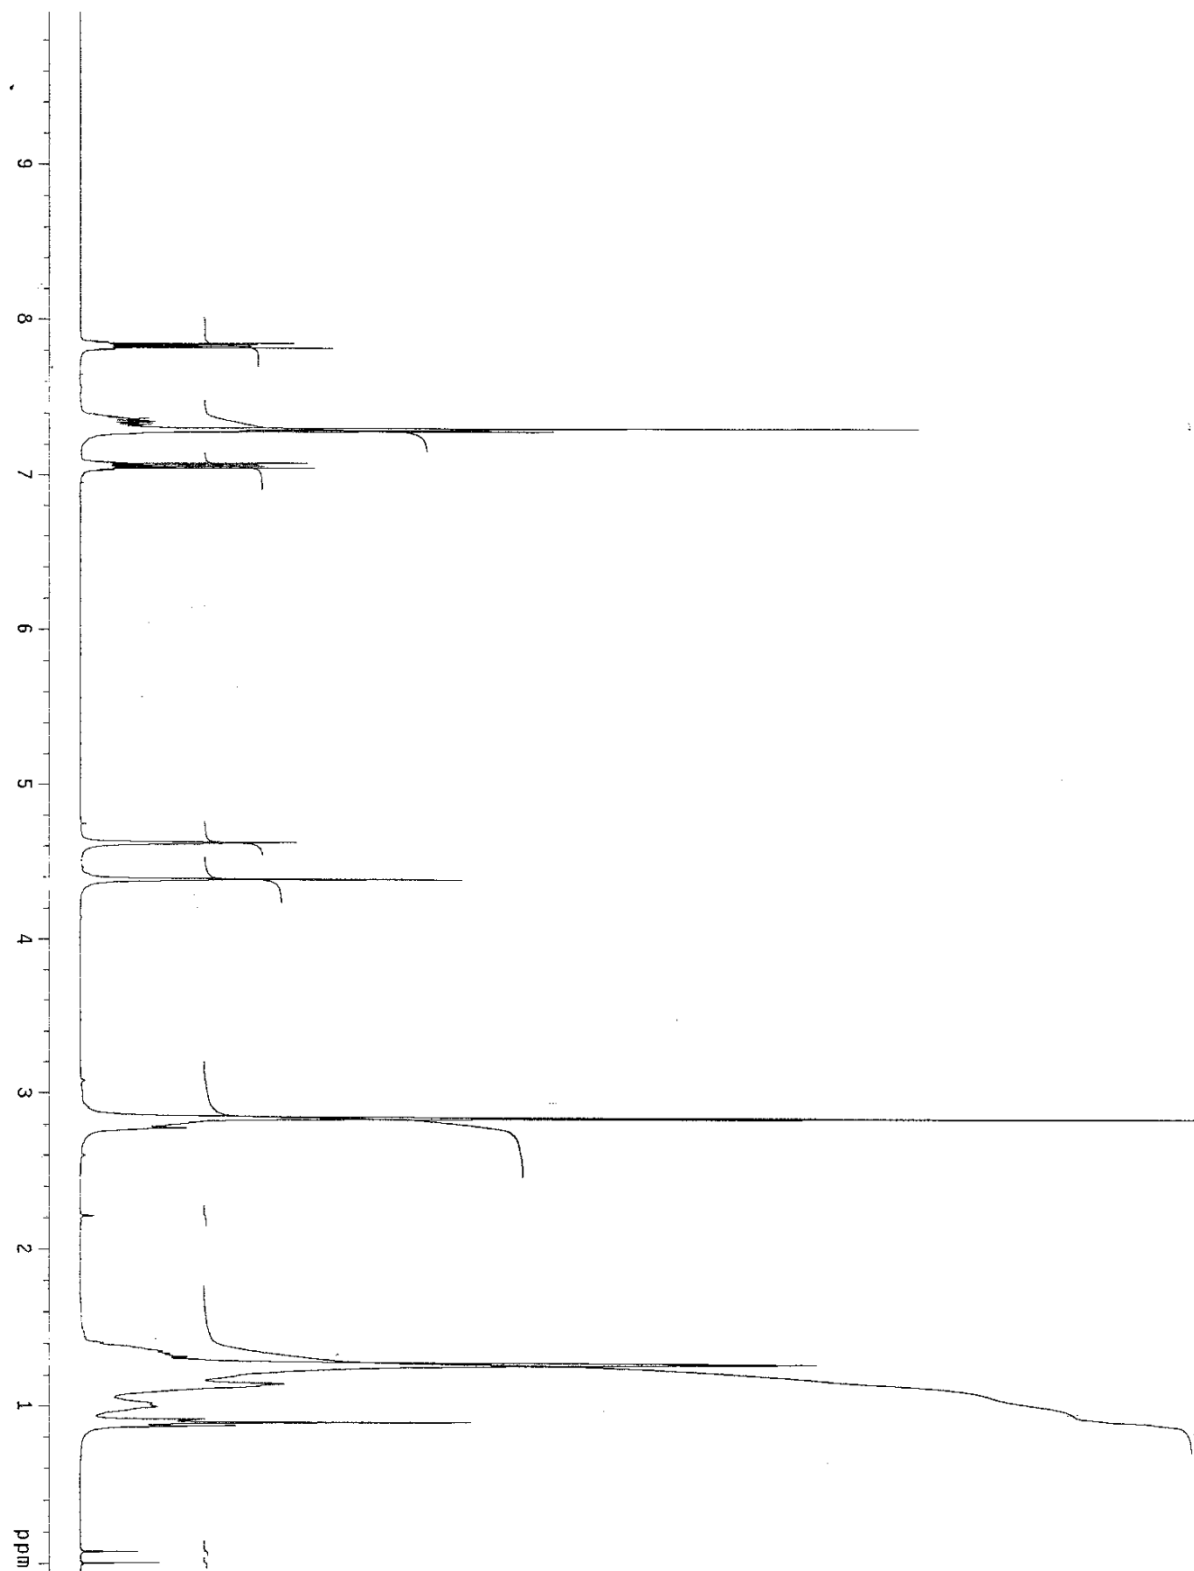

Benzalkonium 1,2,4-triazolate (**6**)  $^1\text{H}$  NMR

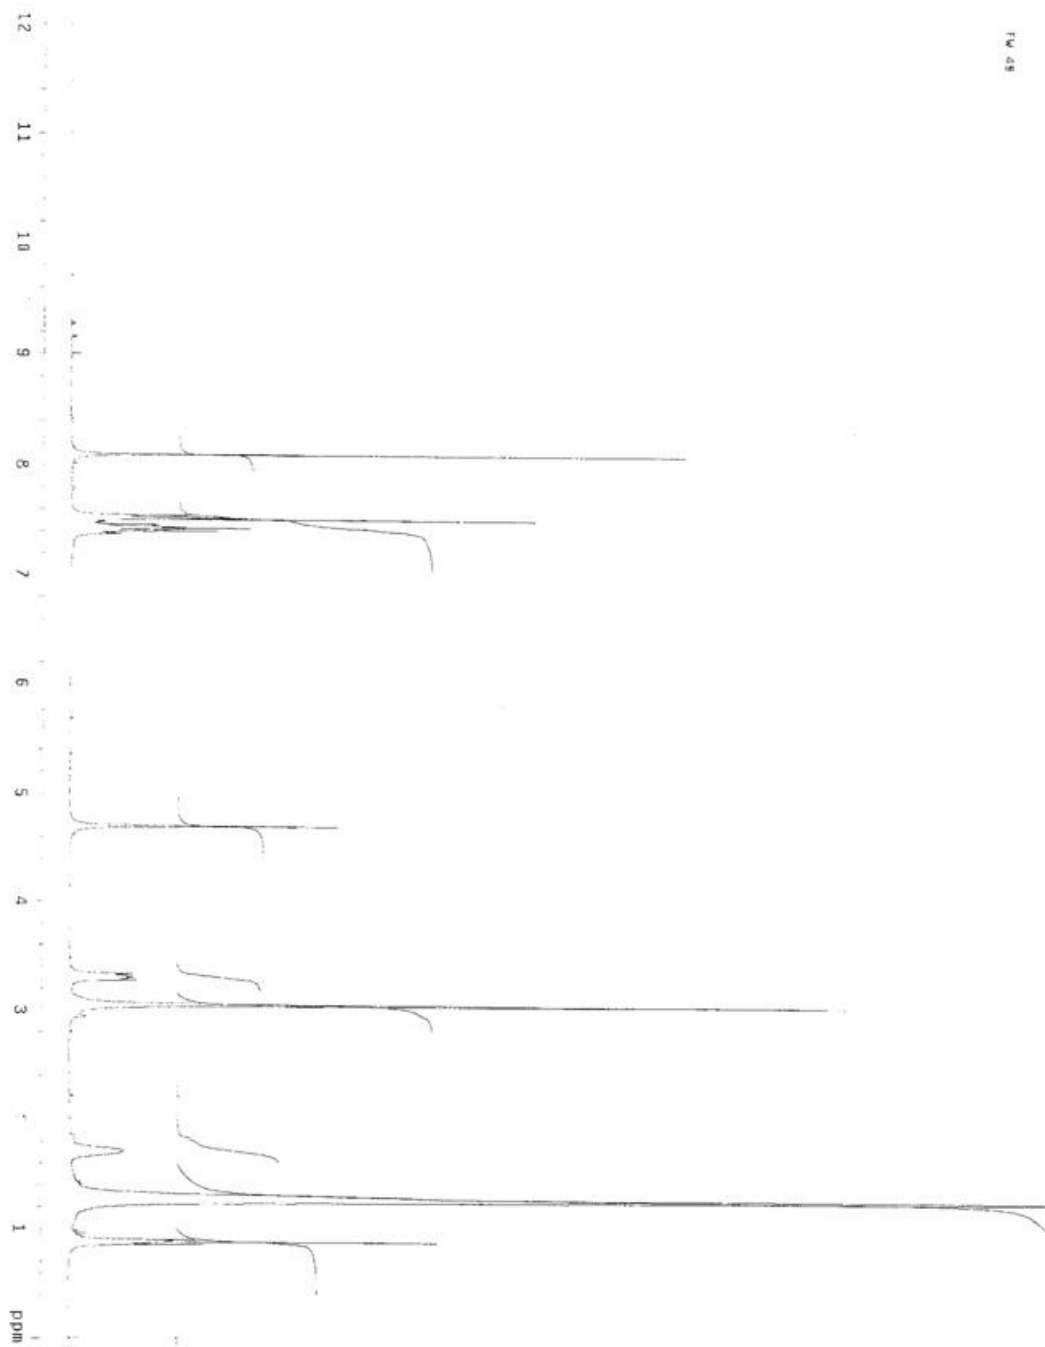

Benzalkonium 4-nitroimidazolate (**7**)  $^1\text{H}$  NMR

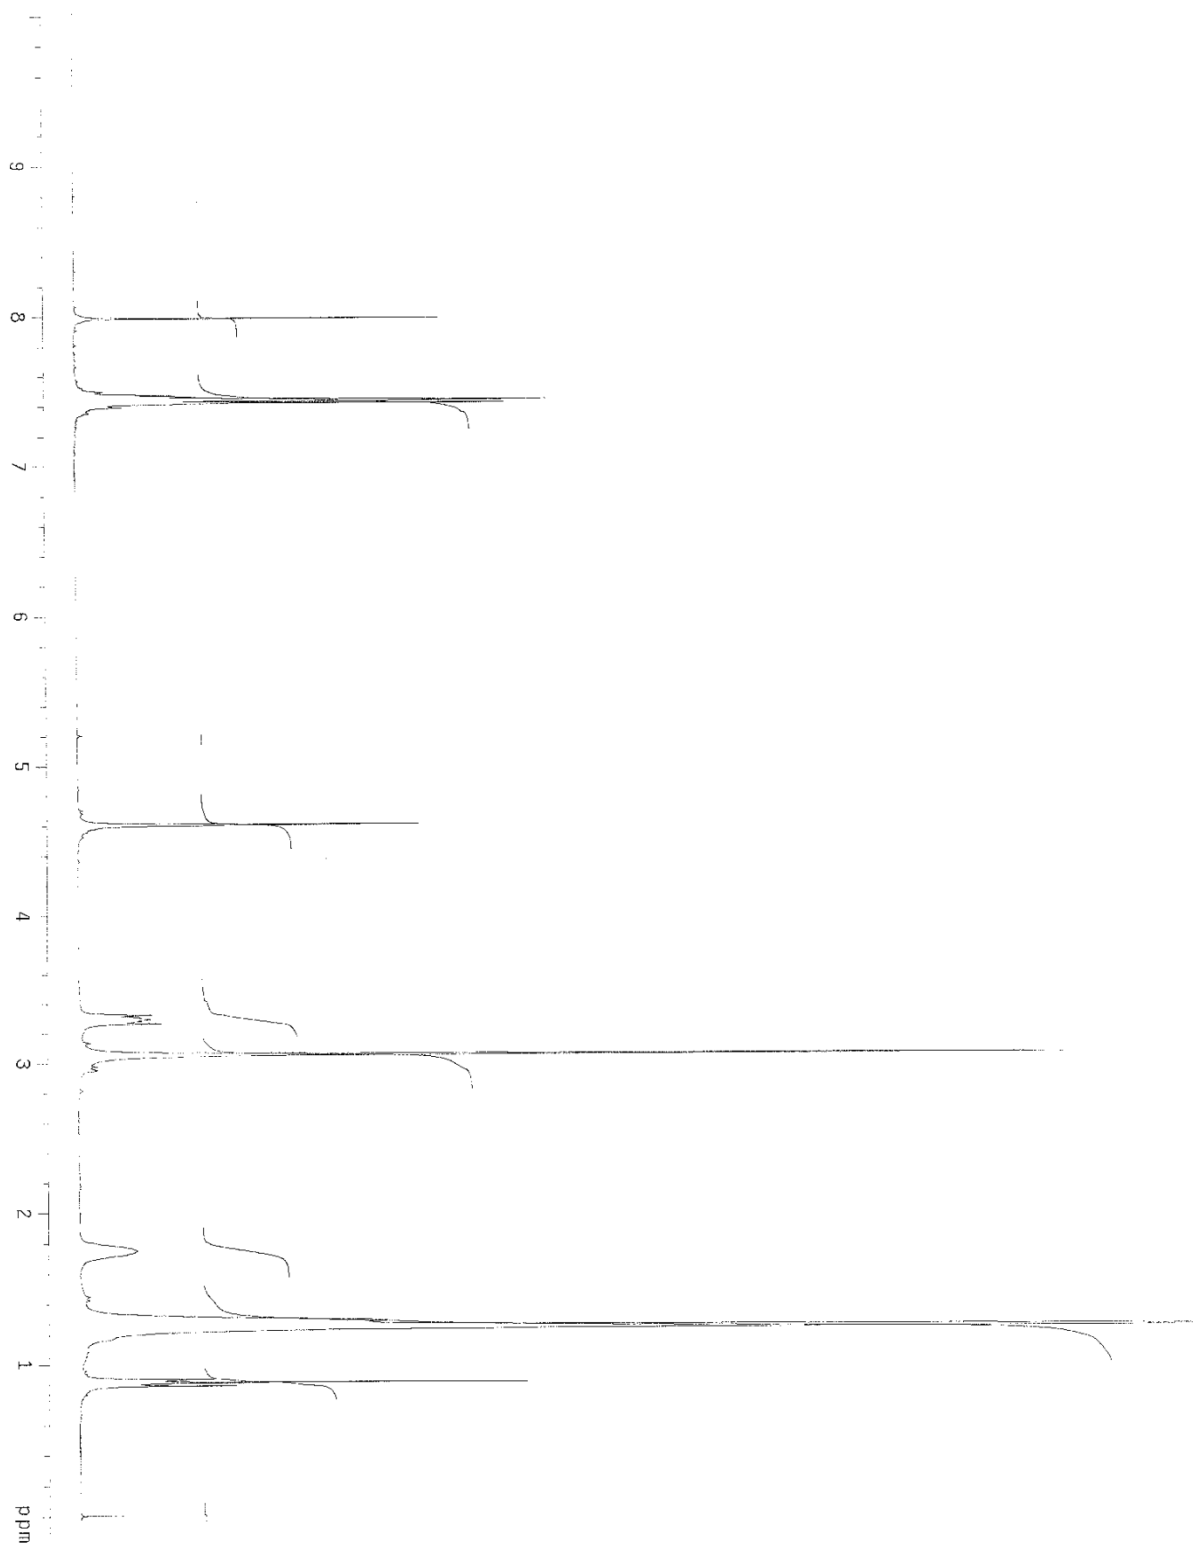

Benzalkonium 2-methyl-4-nitroimidazolate (**8**)  $^1\text{H}$  NMR

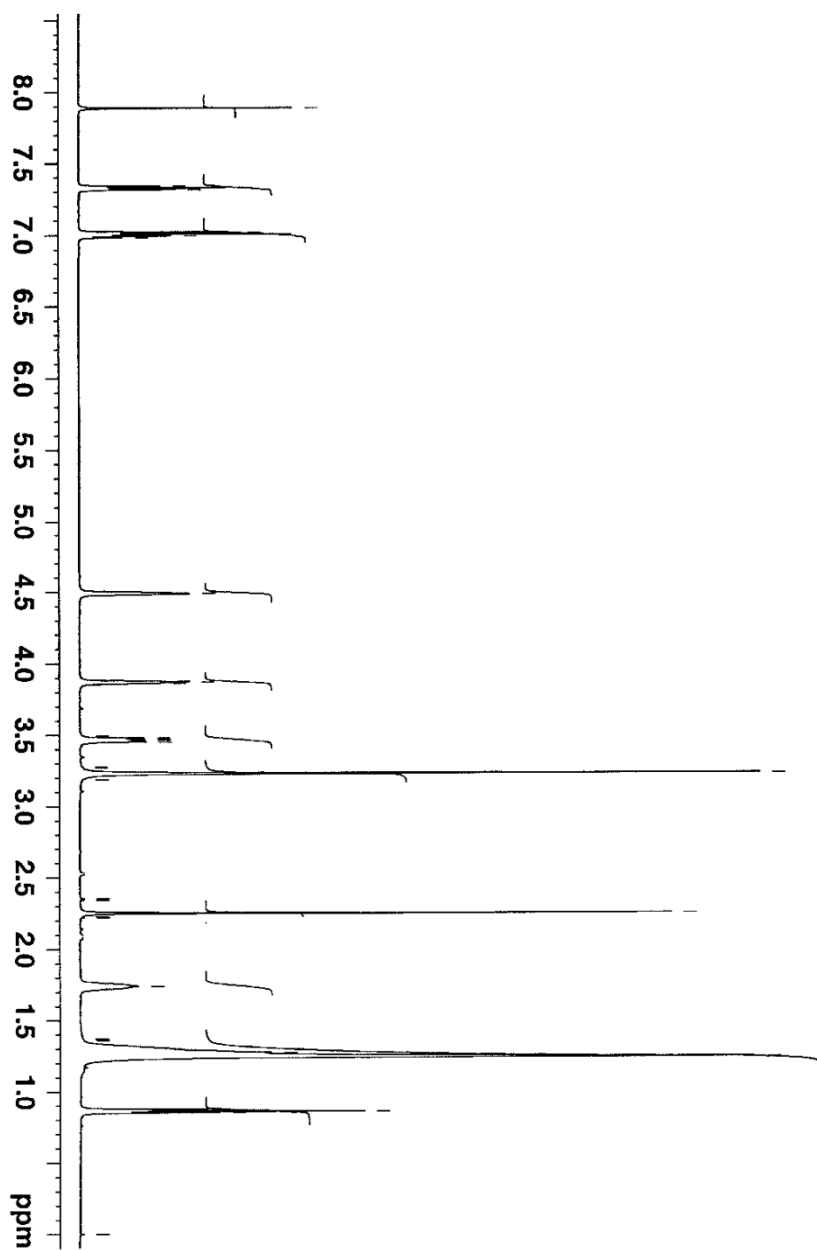

Benzalkonium benzotriazolate (**5**)  $^{13}\text{C}$  NMR

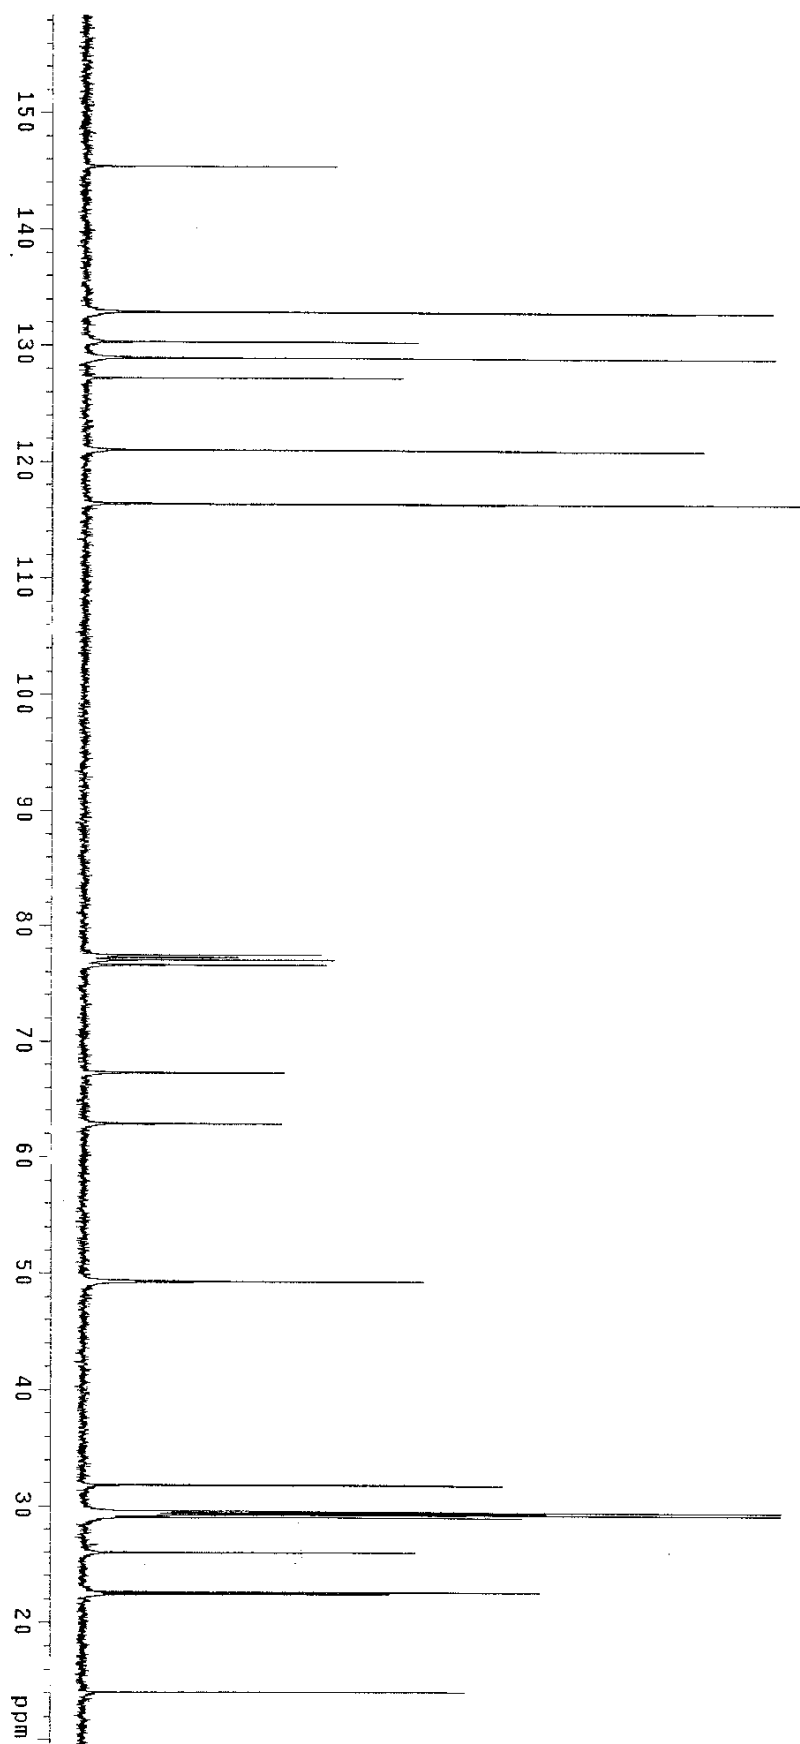

Benzalkonium 1,2,4-triazolate (**6**)  $^{13}\text{C}$  NMR

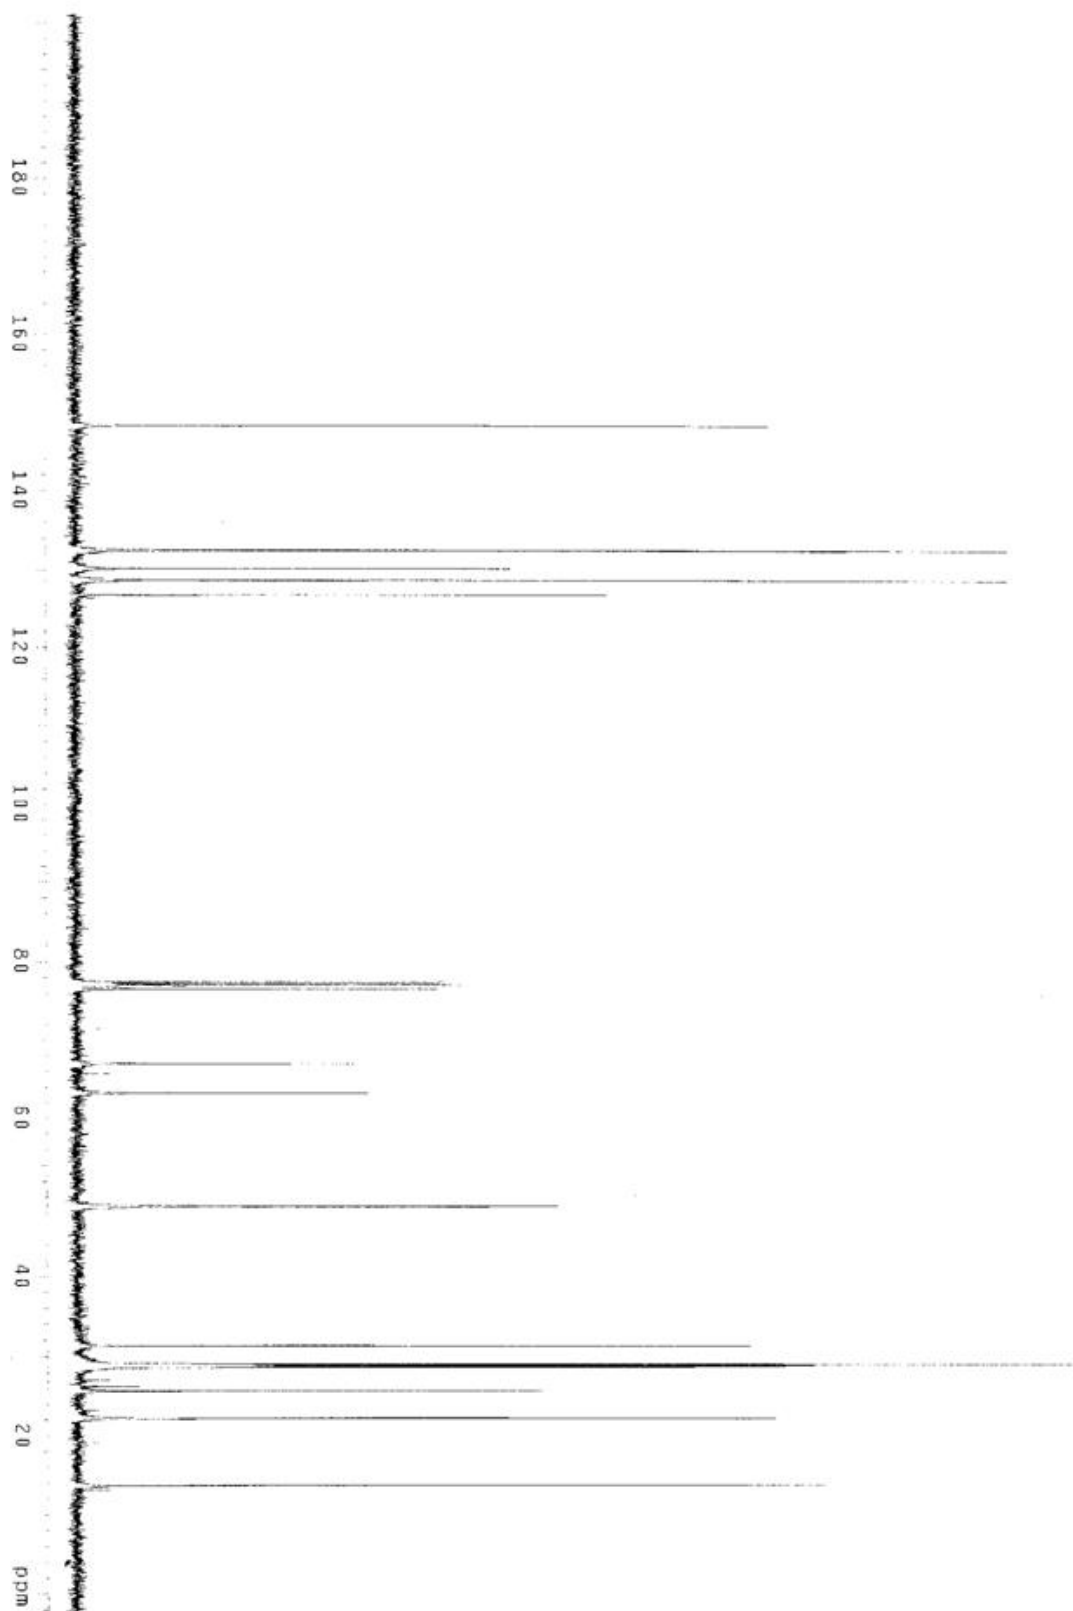

Benzalkonium 4-nitroimidazolate (**7**)  $^{13}\text{C}$  NMR

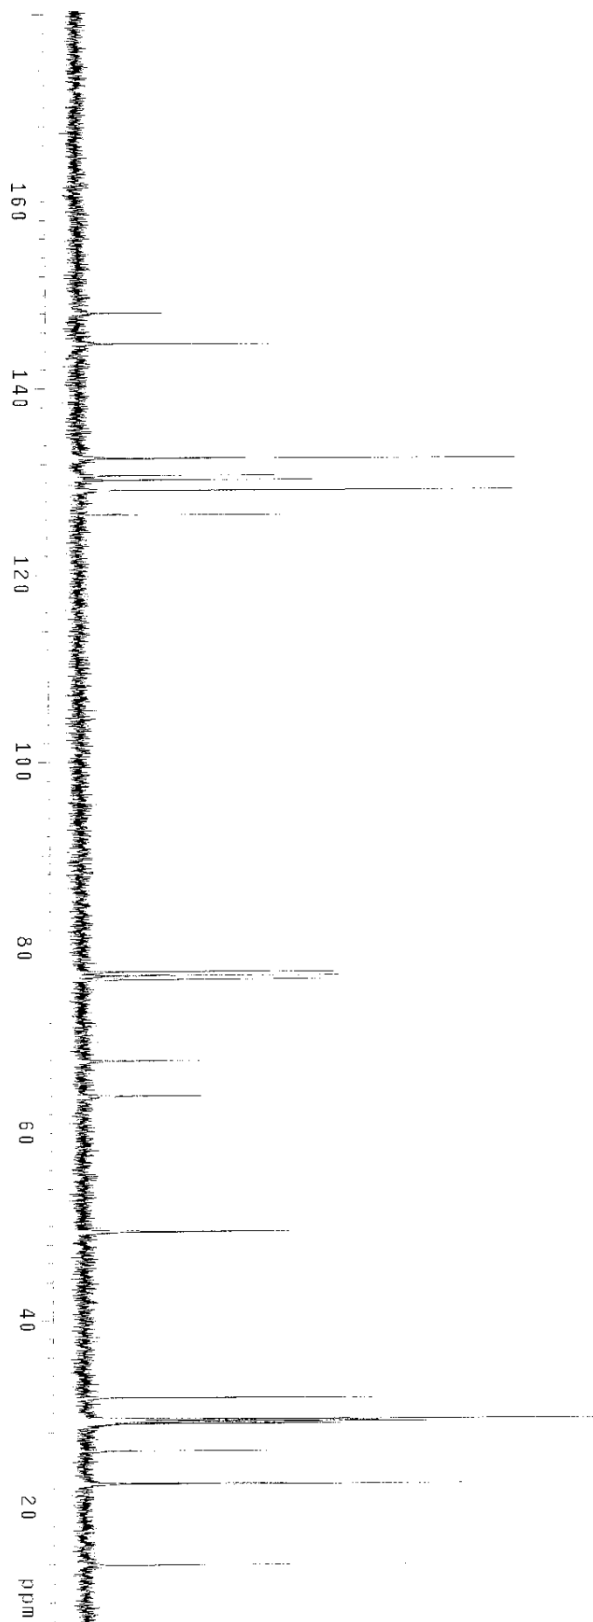

Benzalkonium 2-methyl-4-nitroimidazole (**8**)  $^{13}\text{C}$  NMR

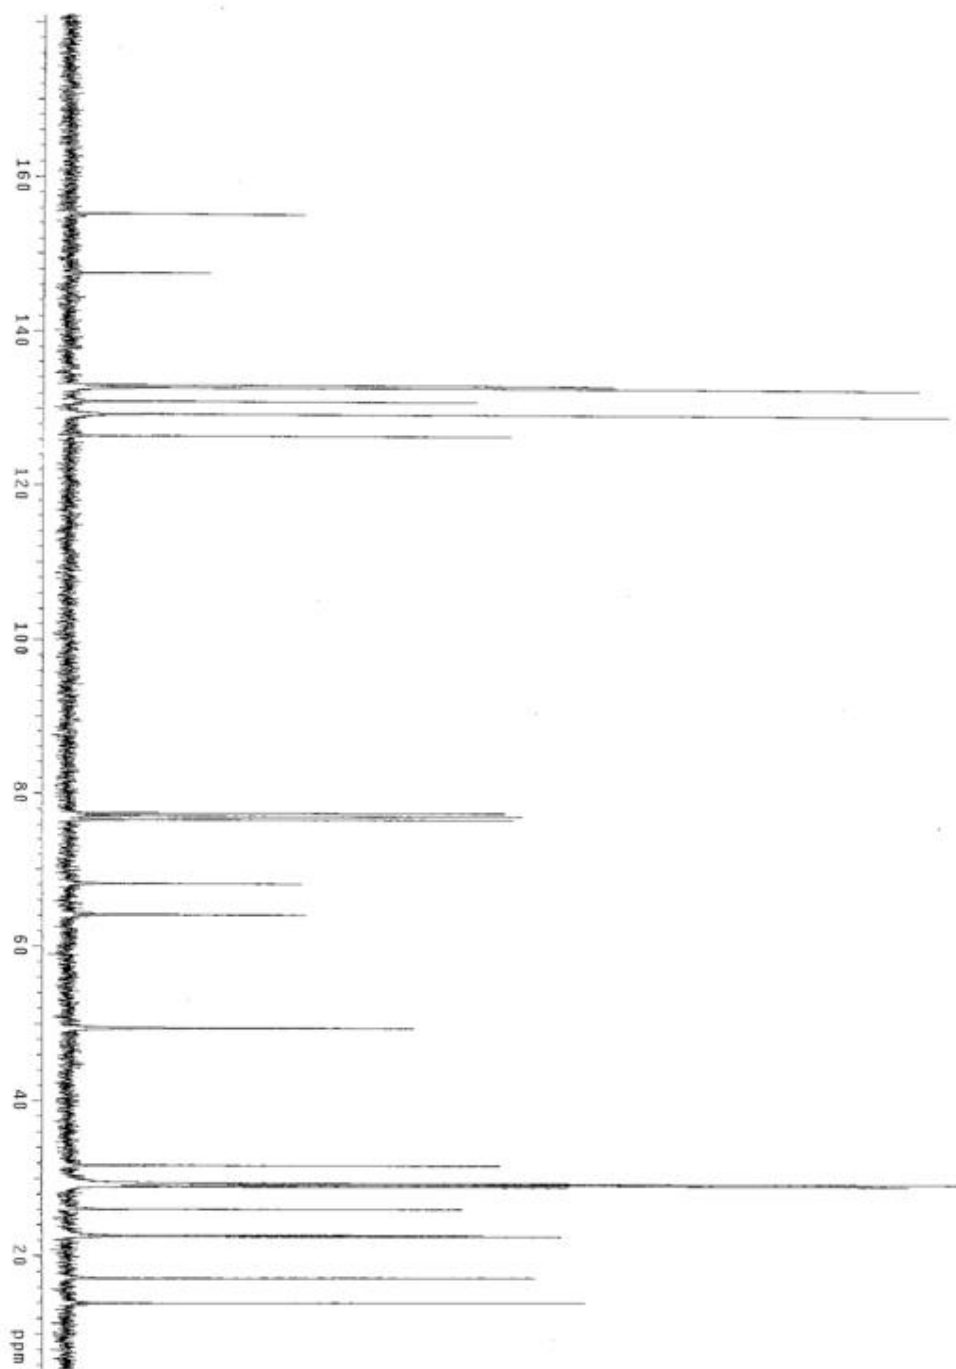



Hexadecyltrimethylammonium benzotriazolate (9)  $^1\text{H}$  NMR

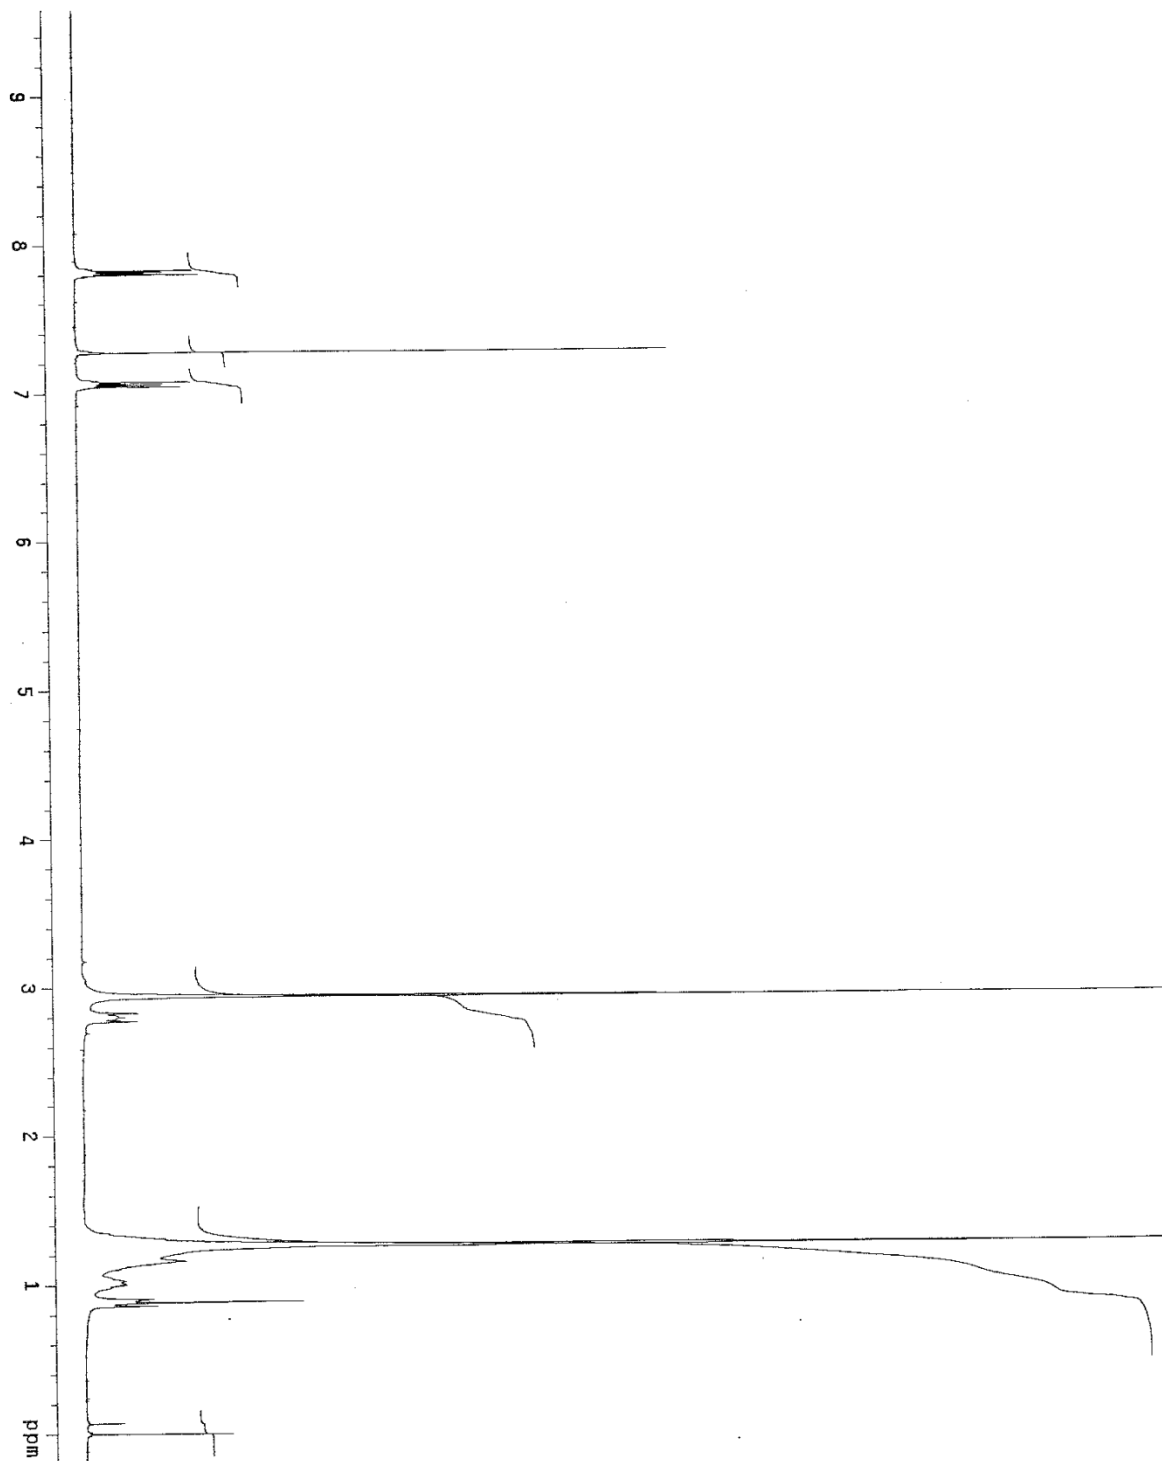

Hexadecyltrimethylammonium 1,2,4-triazolate (**10**)  $^1\text{H}$  NMR

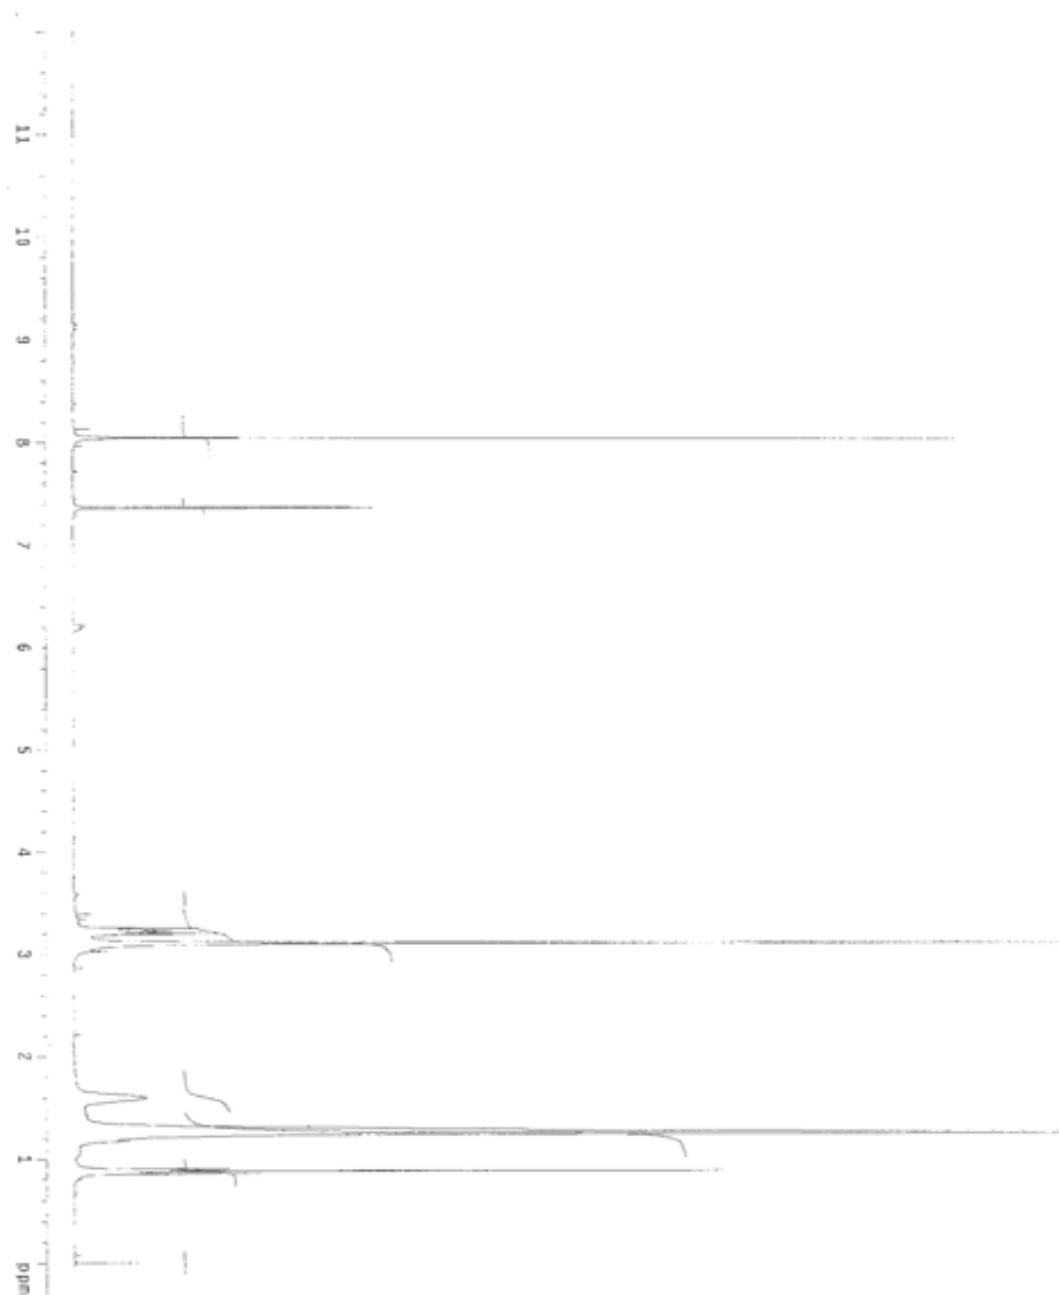

Hexadecyltrimethylammonium 4-nitroimidazolate (**11**)  $^1\text{H}$  NMR

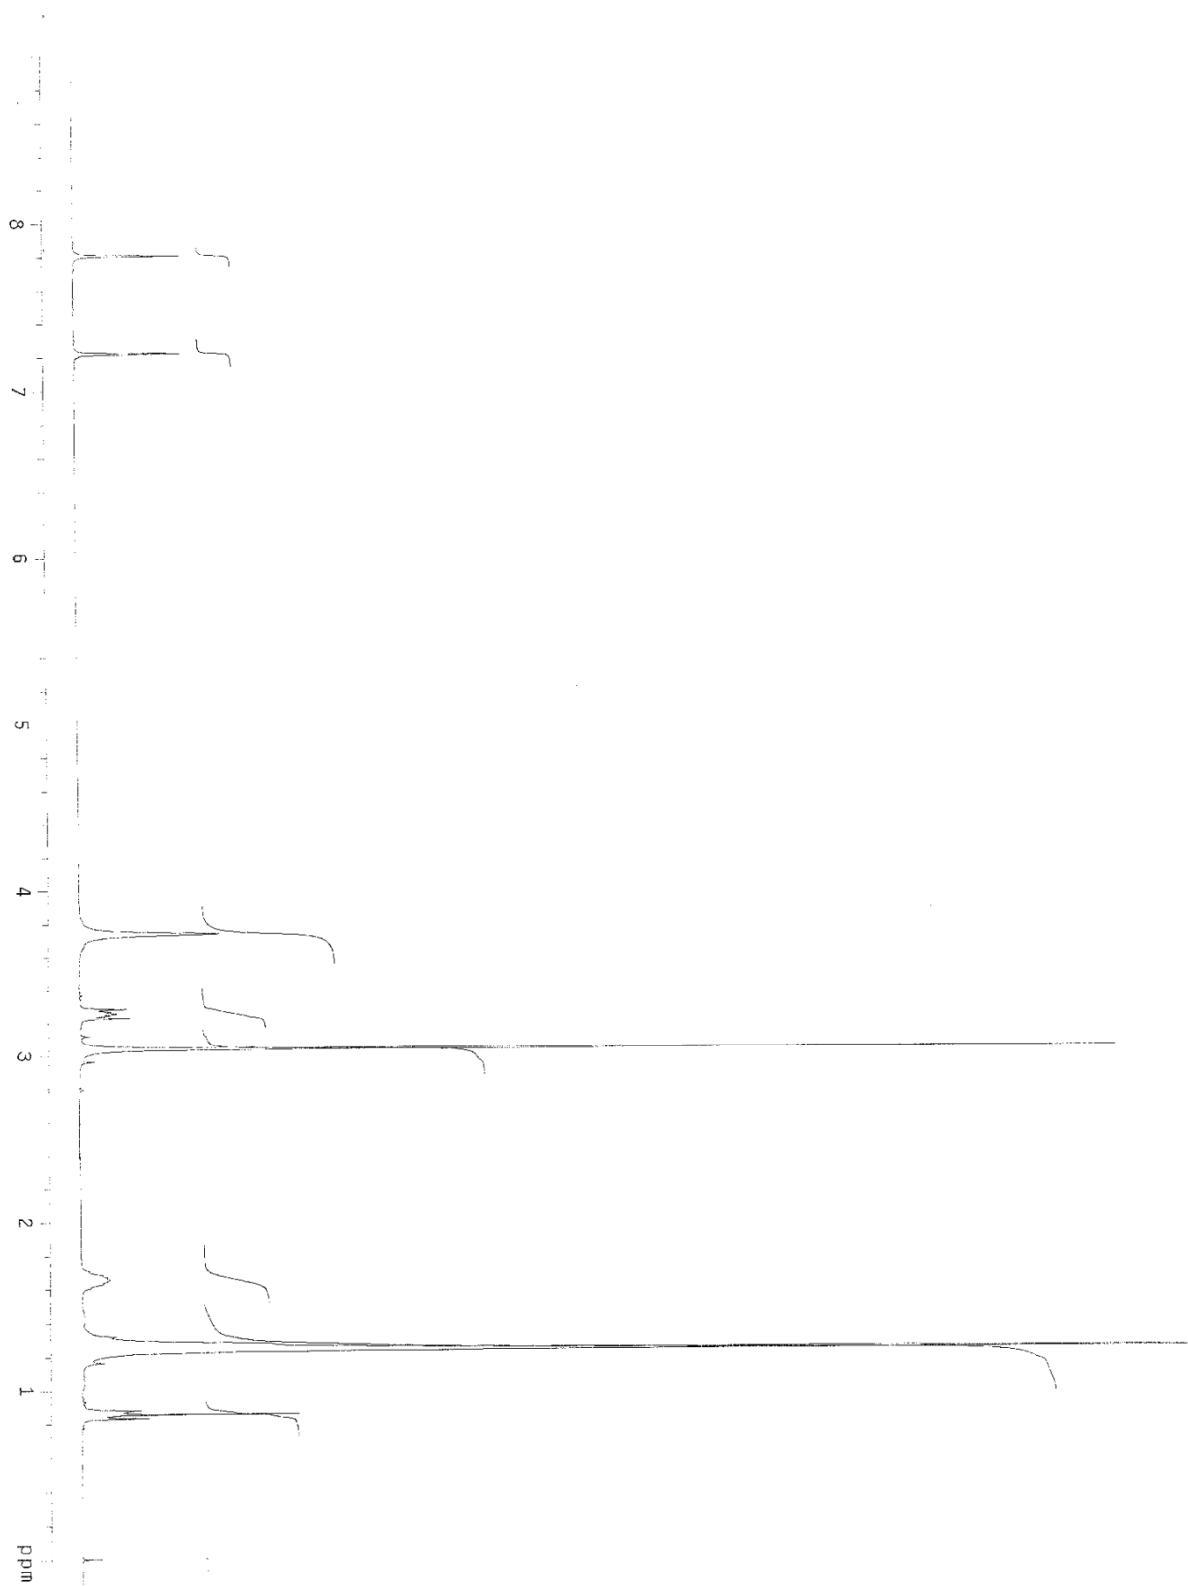

Hexadecyltrimethylammonium 2-methyl-4-nitroimidazole (12)  $^1\text{H}$  NMR

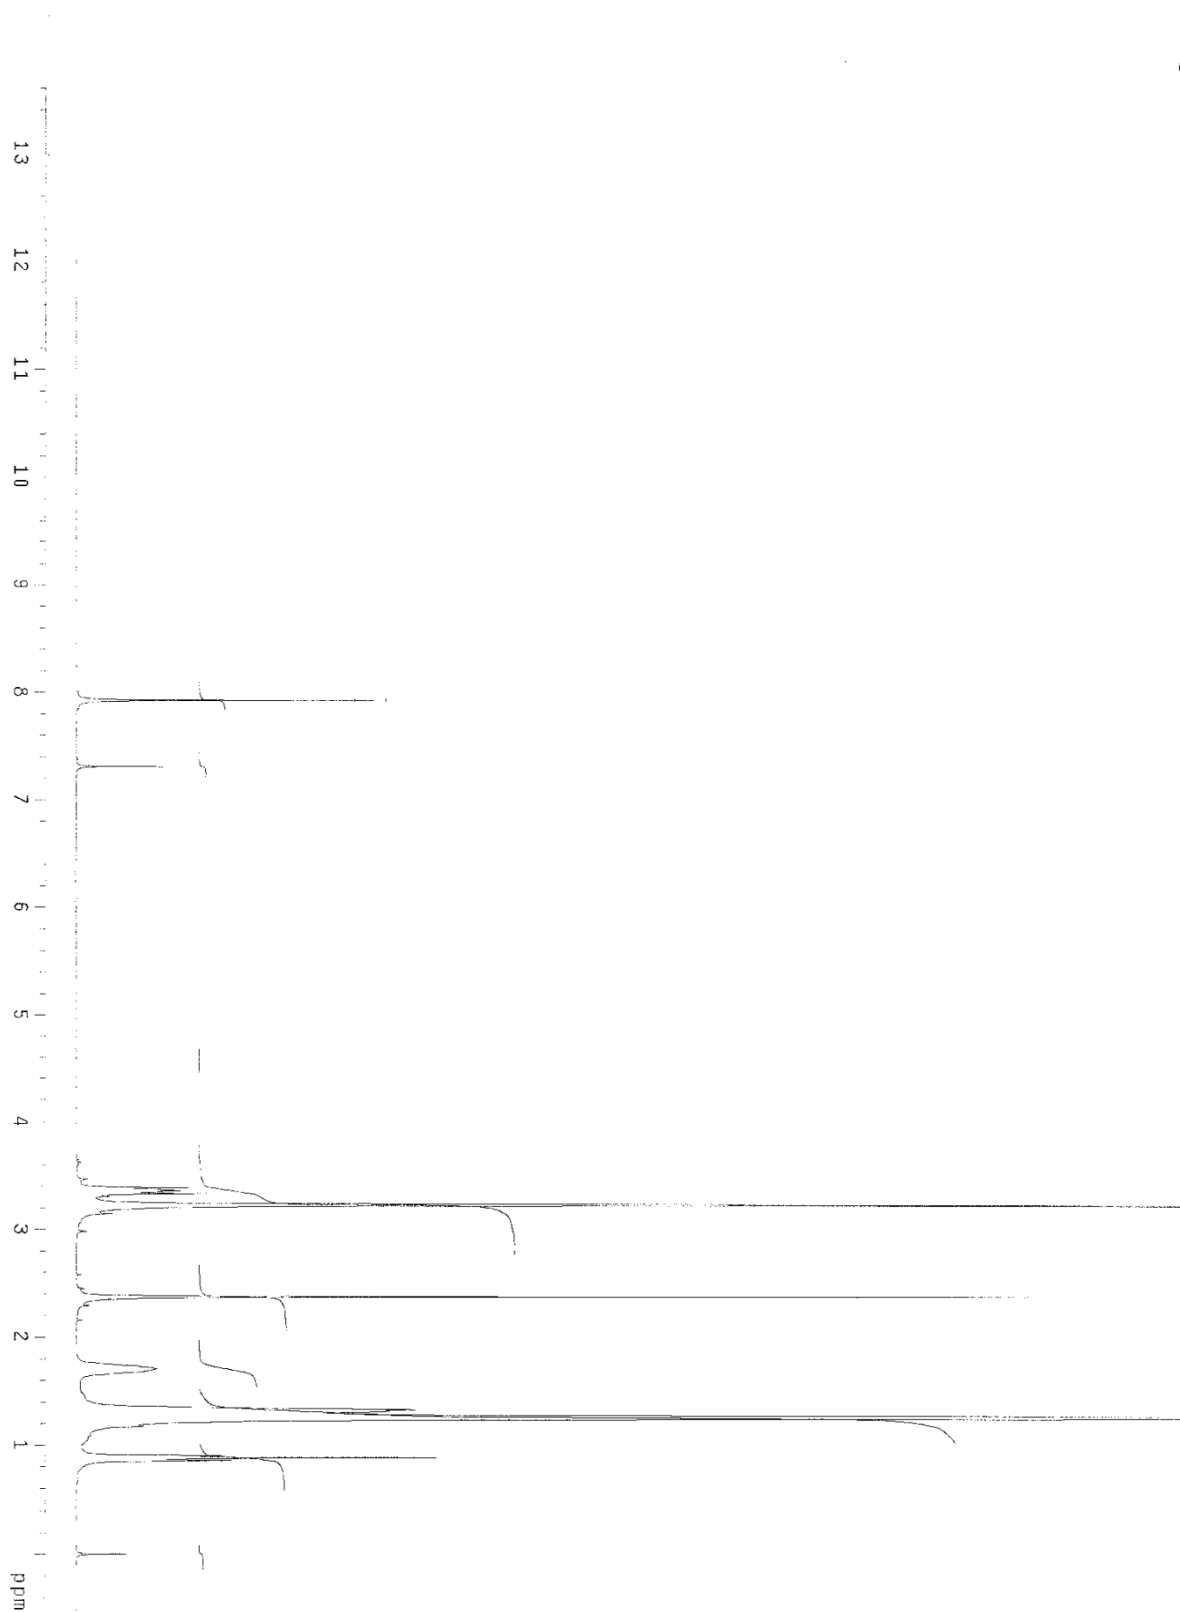

Hexadecyltrimethylammonium benzotriazolate (9)  $^{13}\text{C}$  NMR

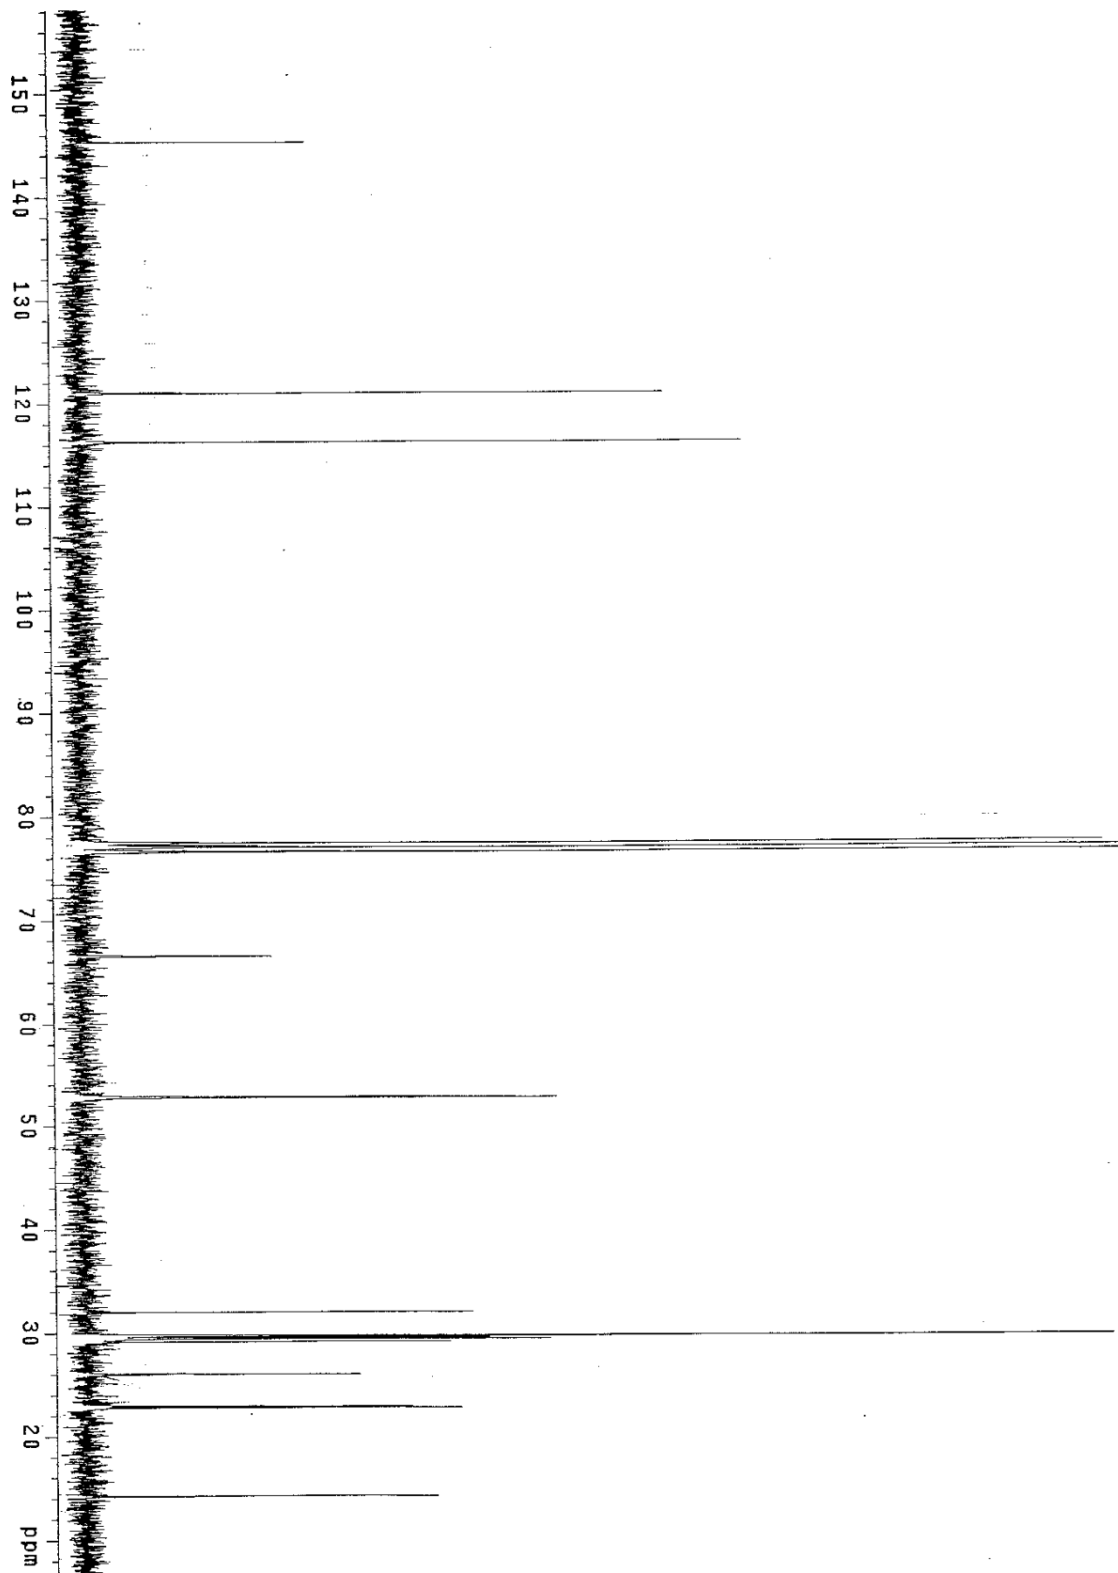

Hexadecyltrimethylammonium 1,2,4-triazolate (**10**)  $^{13}\text{C}$  NMR

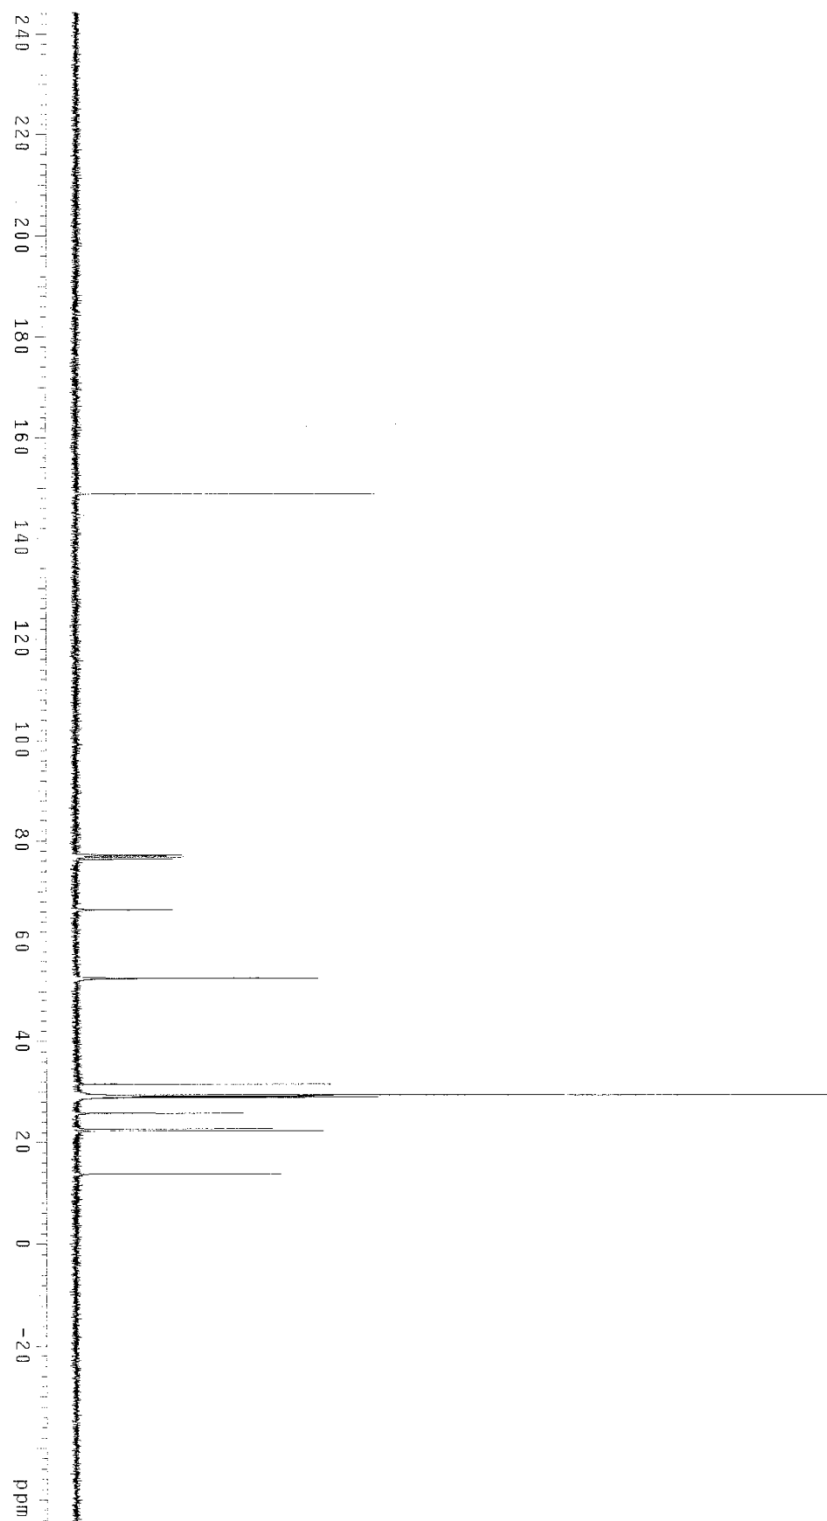

Hexadecyltrimethylammonium 4-nitroimidazolate (**11**)  $^{13}\text{C}$  NMR

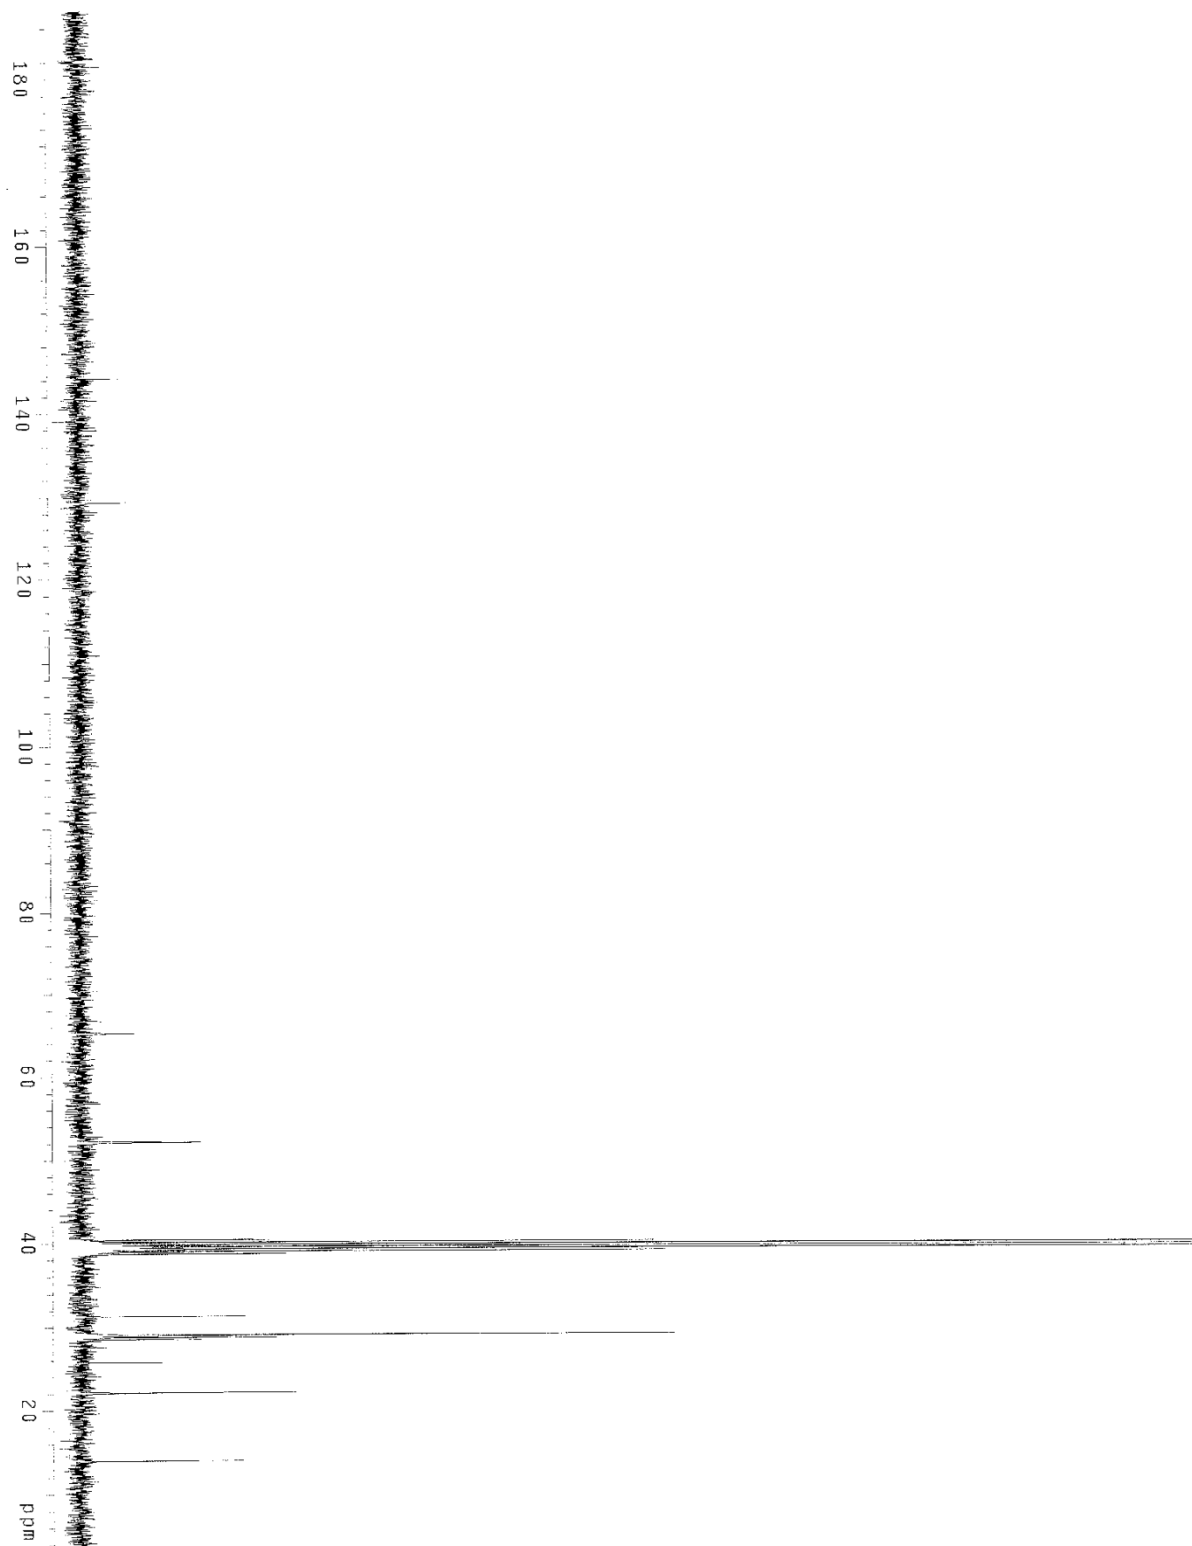

Hexadecyltrimethylammonium 2-methyl-4-nitroimidazole (12)  $^{13}\text{C}$  NMR

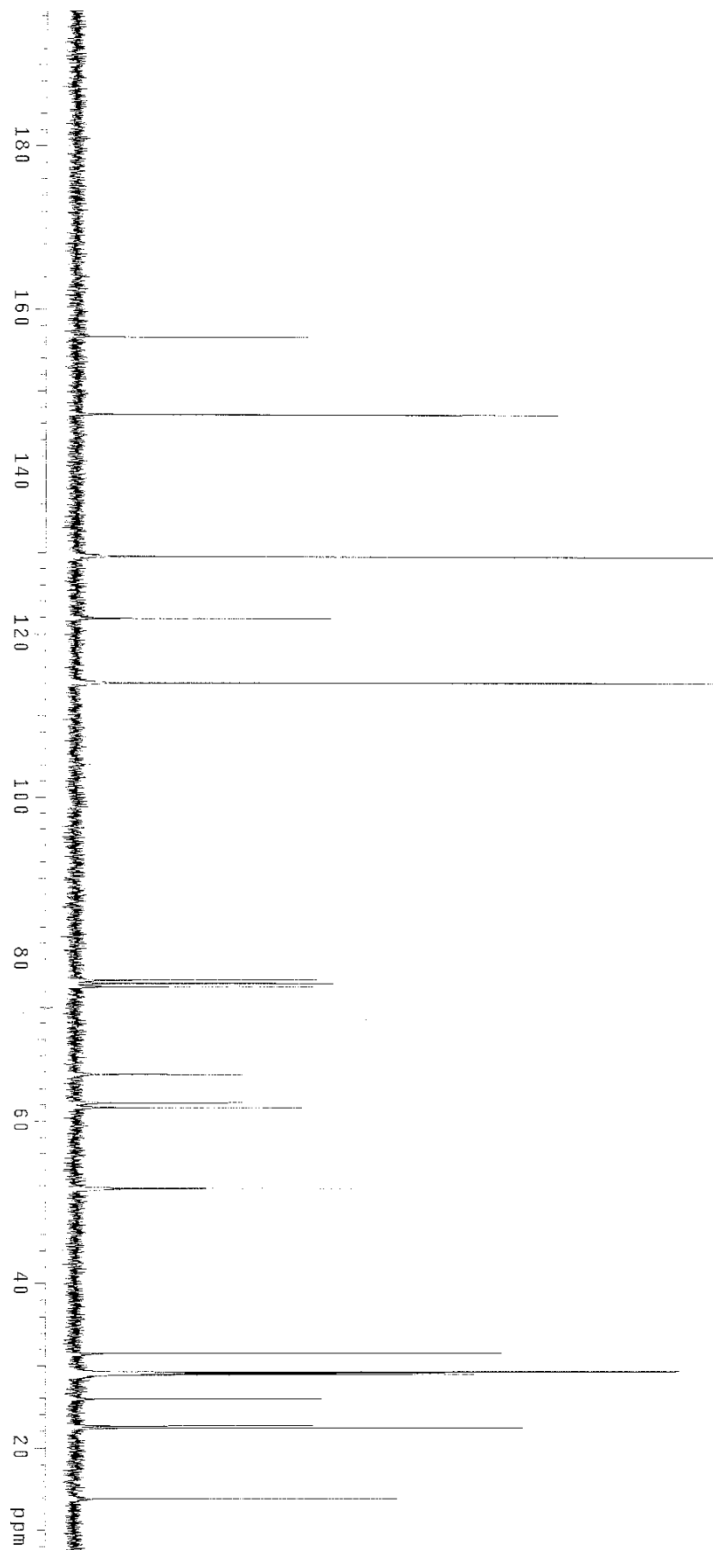



Domiphen benzotriazolate (**13**)  $^1\text{H}$  NMR

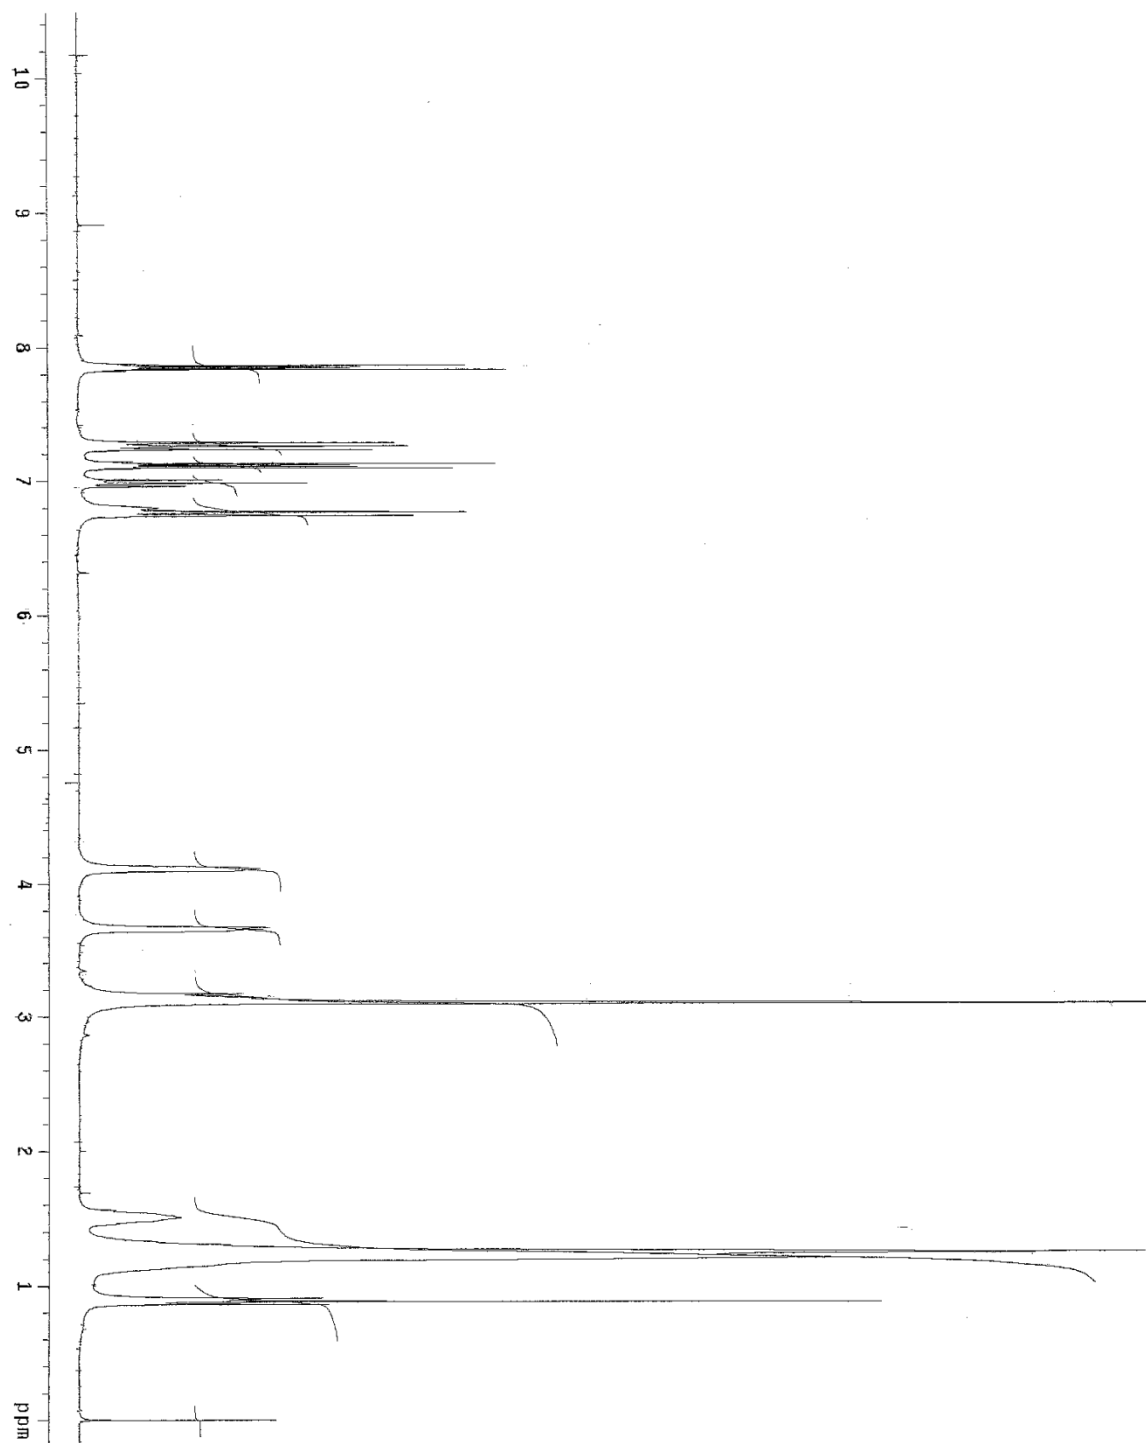

Domiphen 1,2,4-triazolate (**14**)  $^1\text{H}$  NMR

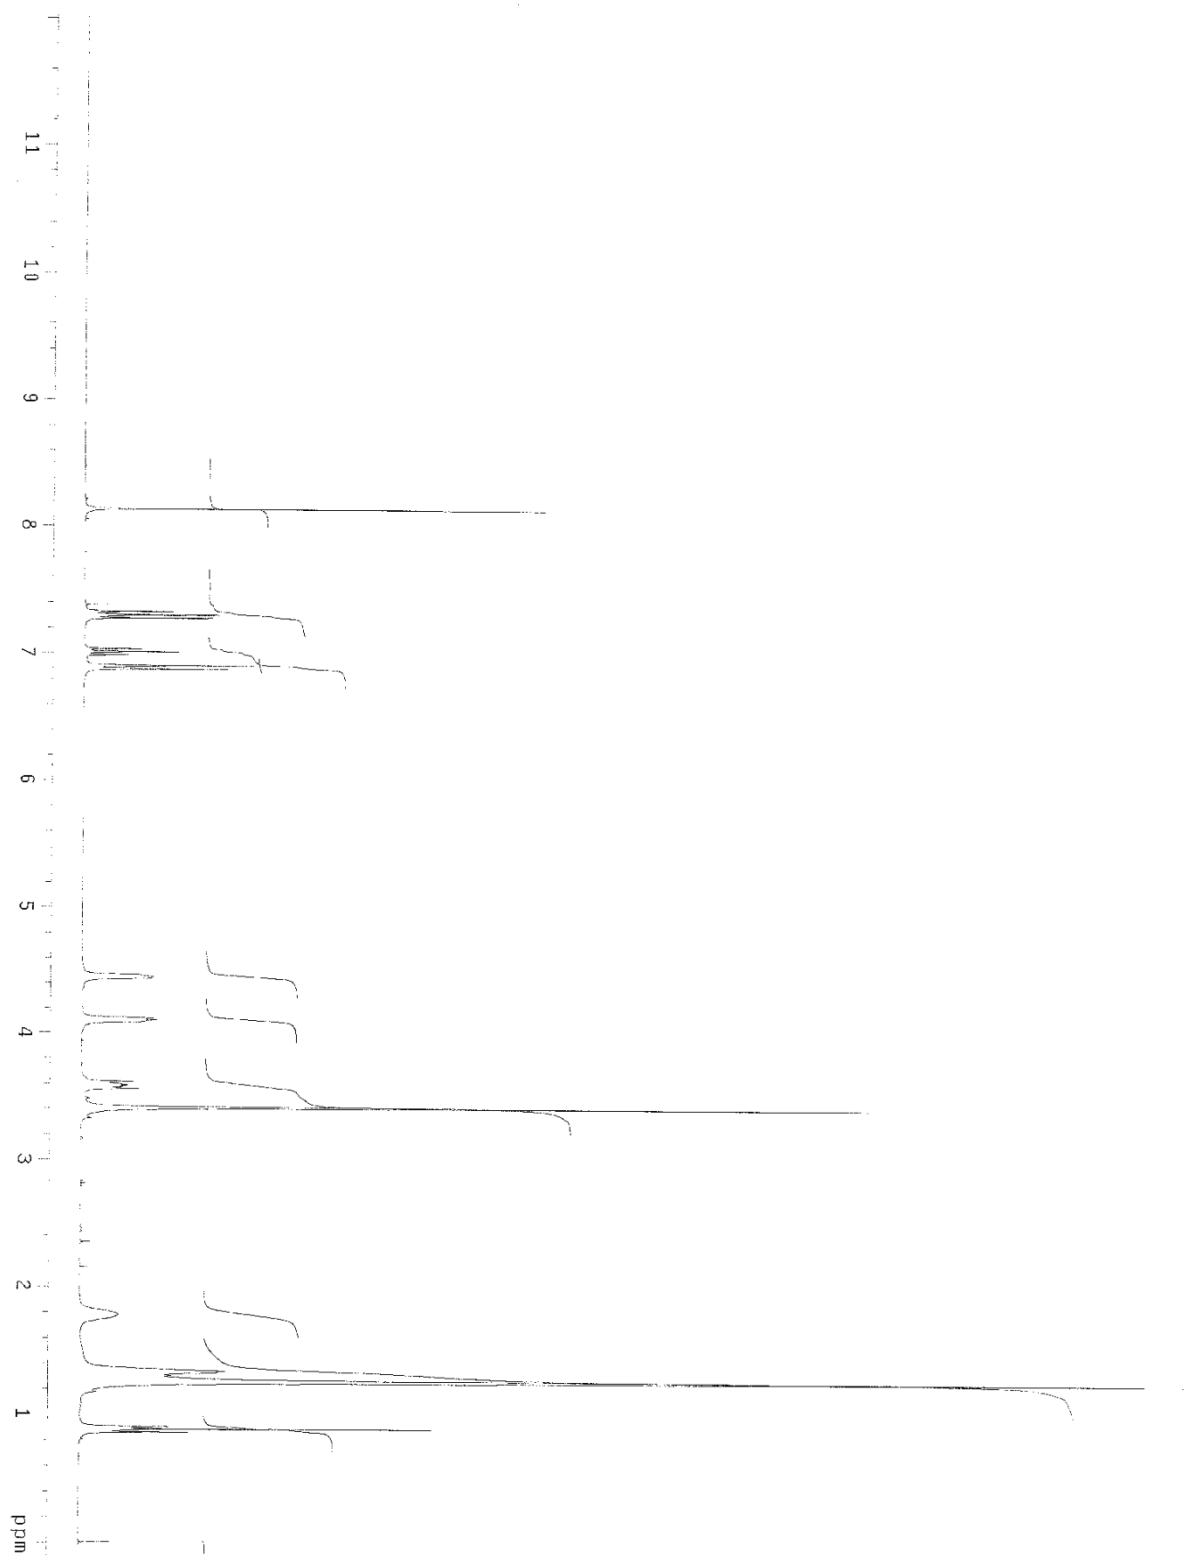

Domiphen 4-nitroimidazolate (**15**)  $^1\text{H}$  NMR

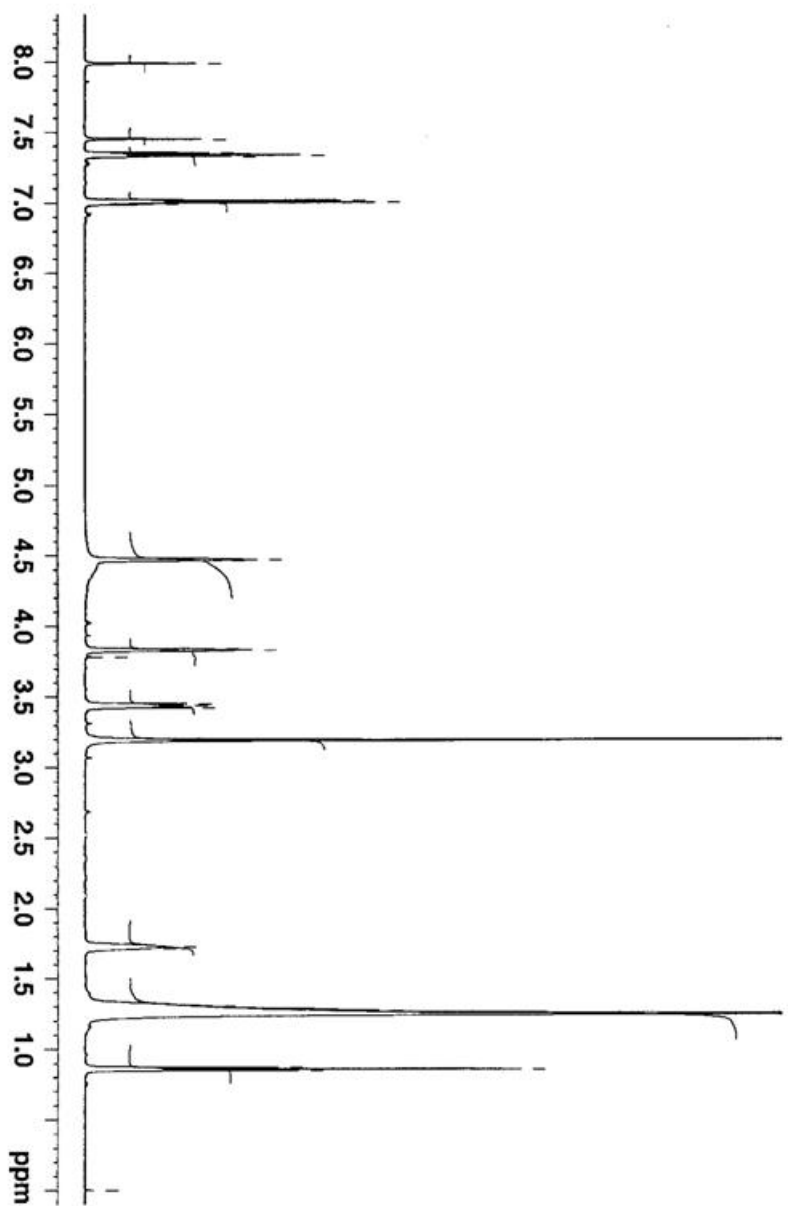

Domiphen 2-methyl-4-nitroimidazolate (**16**)  $^1\text{H}$  NMR



Domiphen benzotriazolate (**13**)  $^{13}\text{C}$  NMR

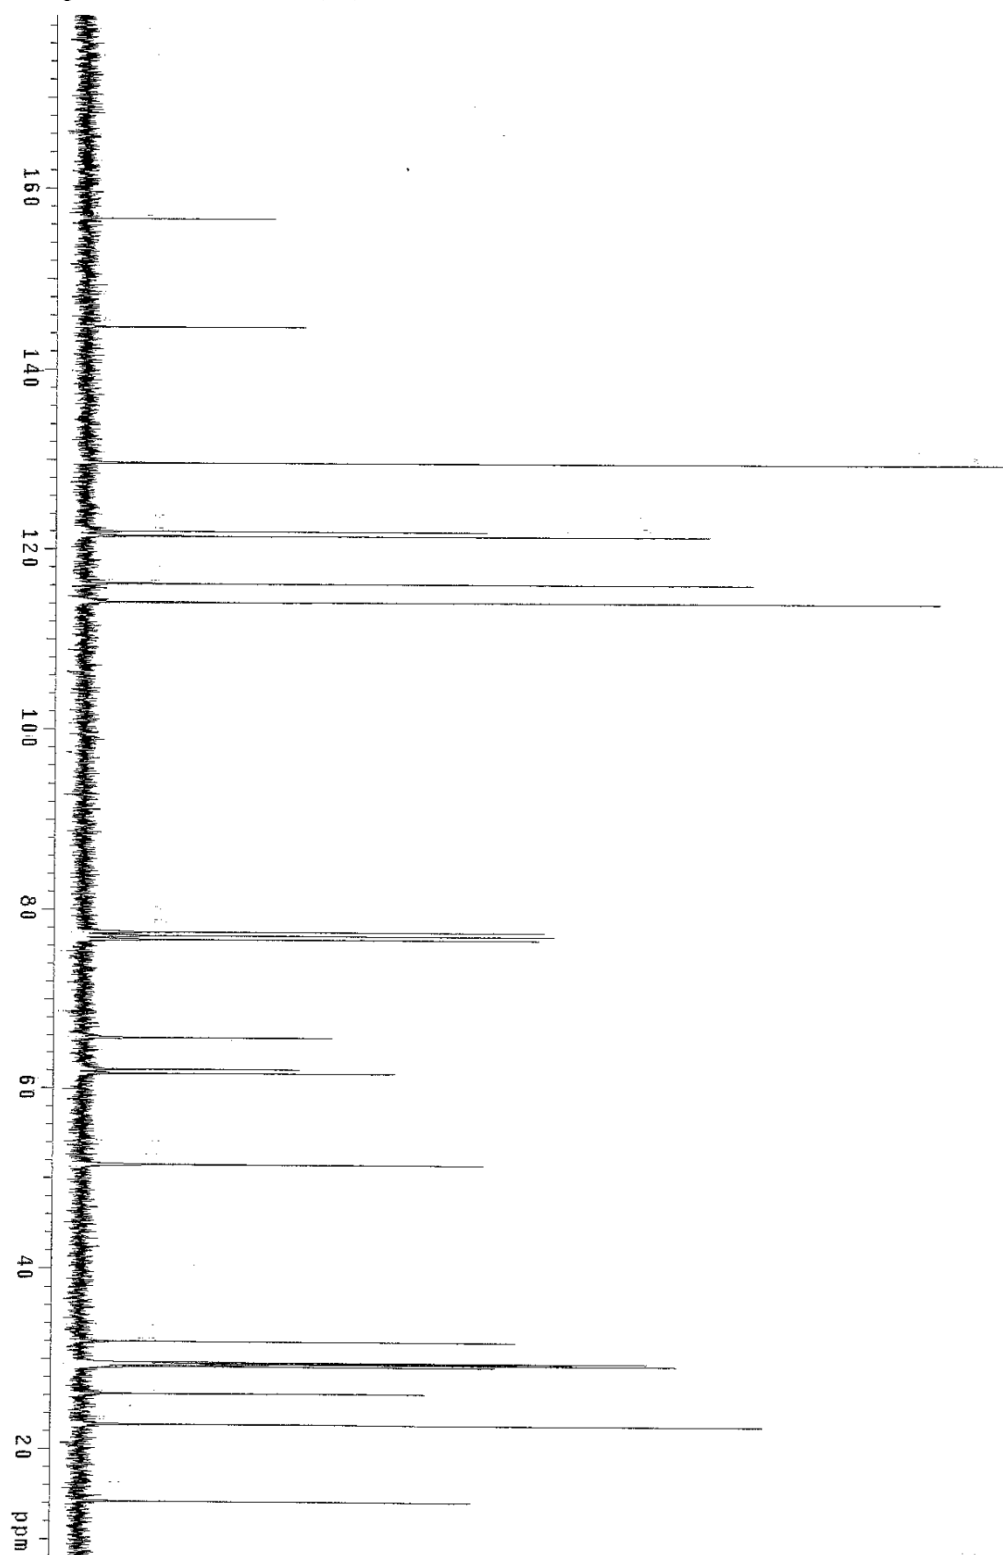

Domiphen 1,2,4-triazolate (**14**)  $^{13}\text{C}$  NMR

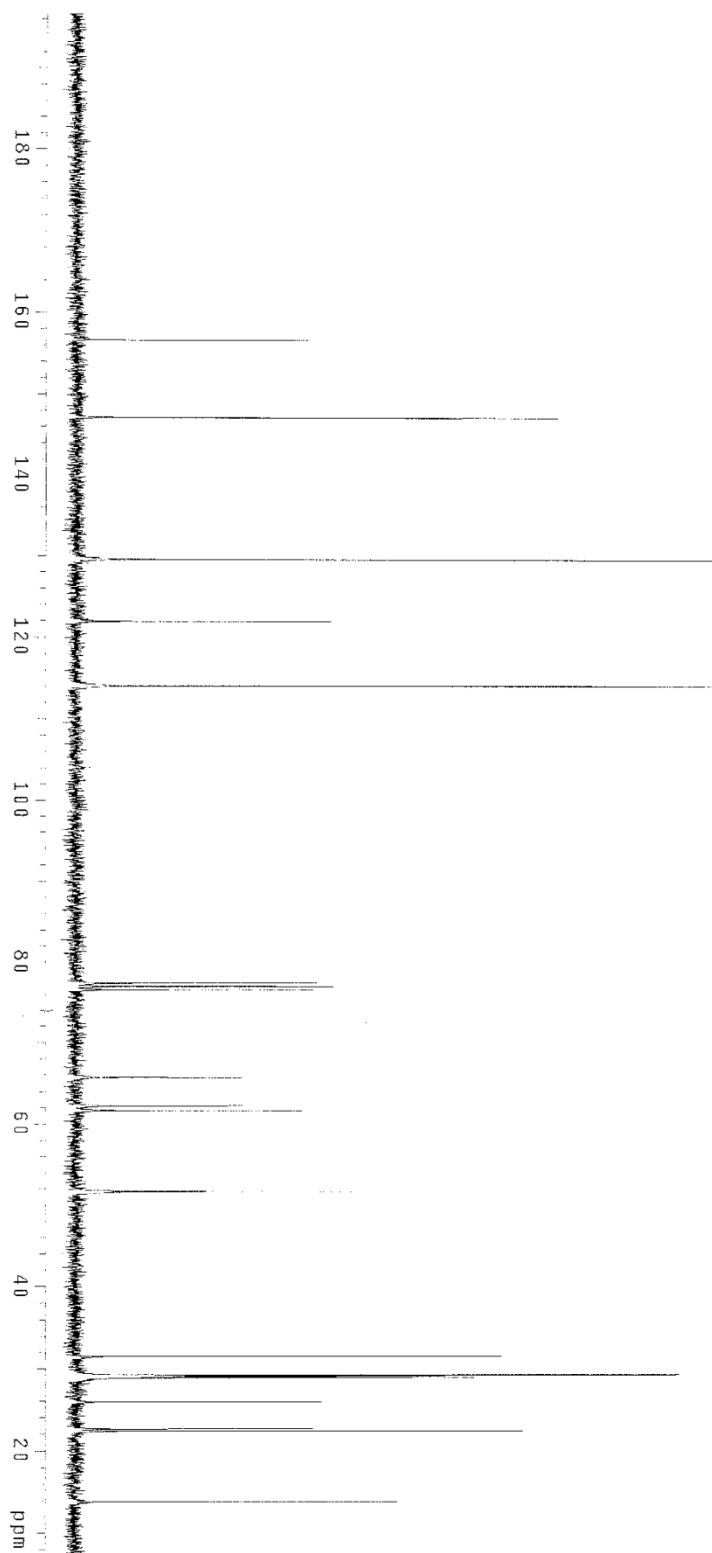

Domiphen 4-nitroimidazolate (**15**)  $^{13}\text{C}$  NMR

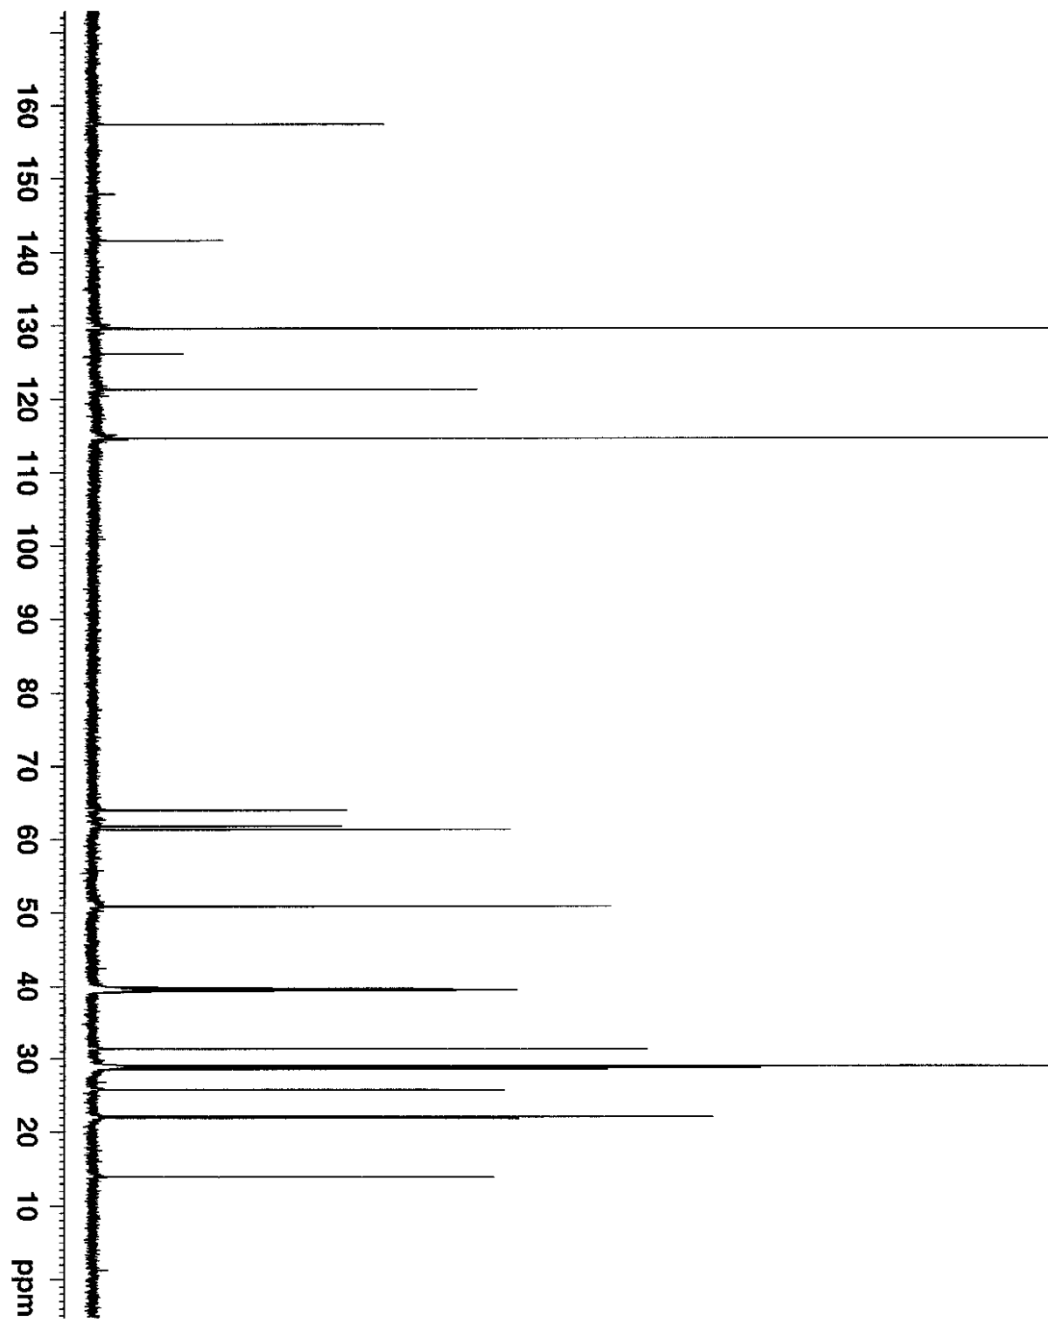

Domiphen 2-methyl-4-nitroimidazolate (**16**)  $^{13}\text{C}$  NMR

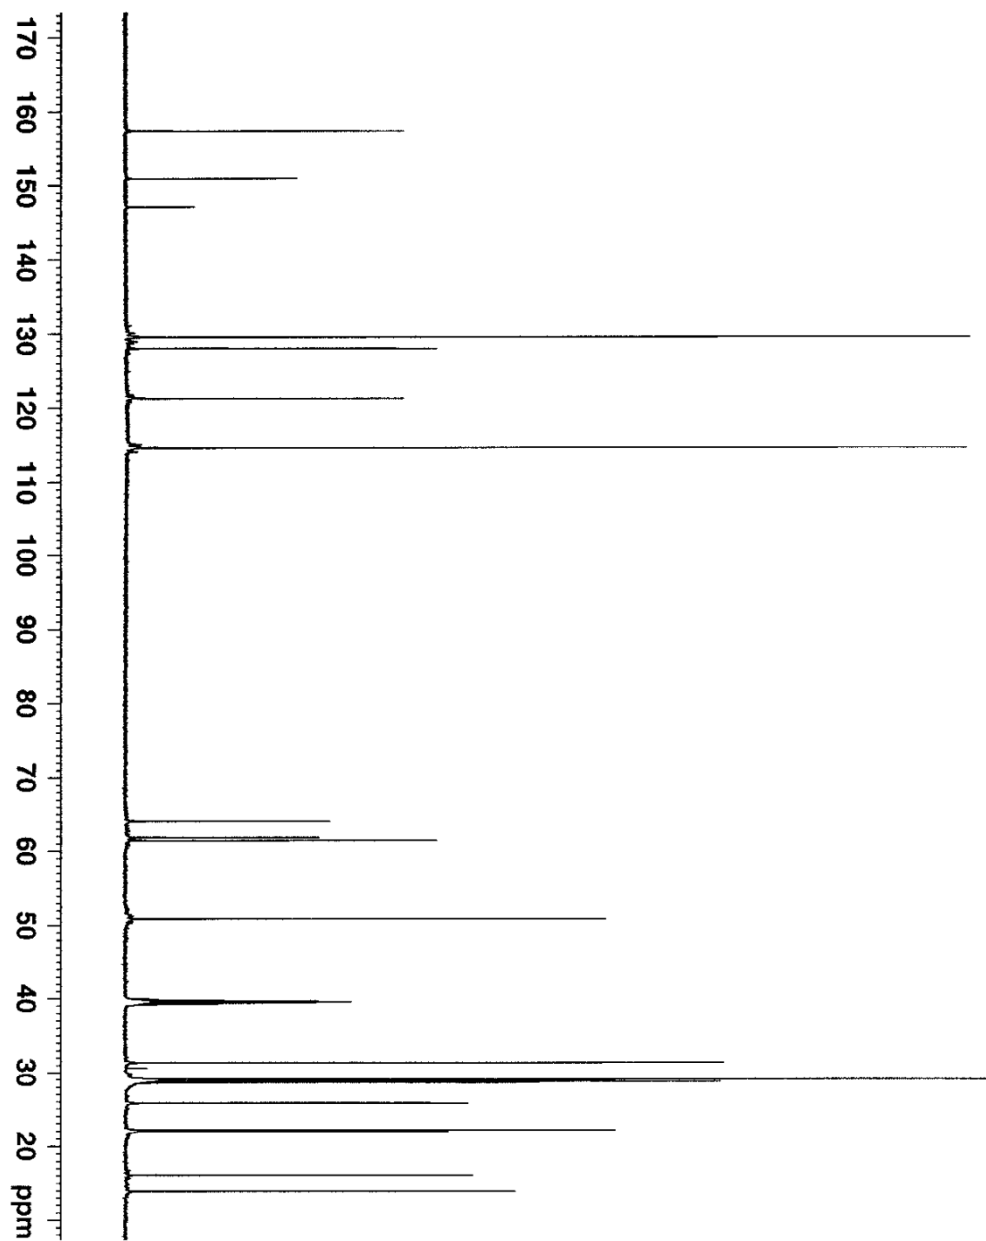



## Supporting information - DSC curves

### Didecyldimethylammonium benzotriazolate (1)

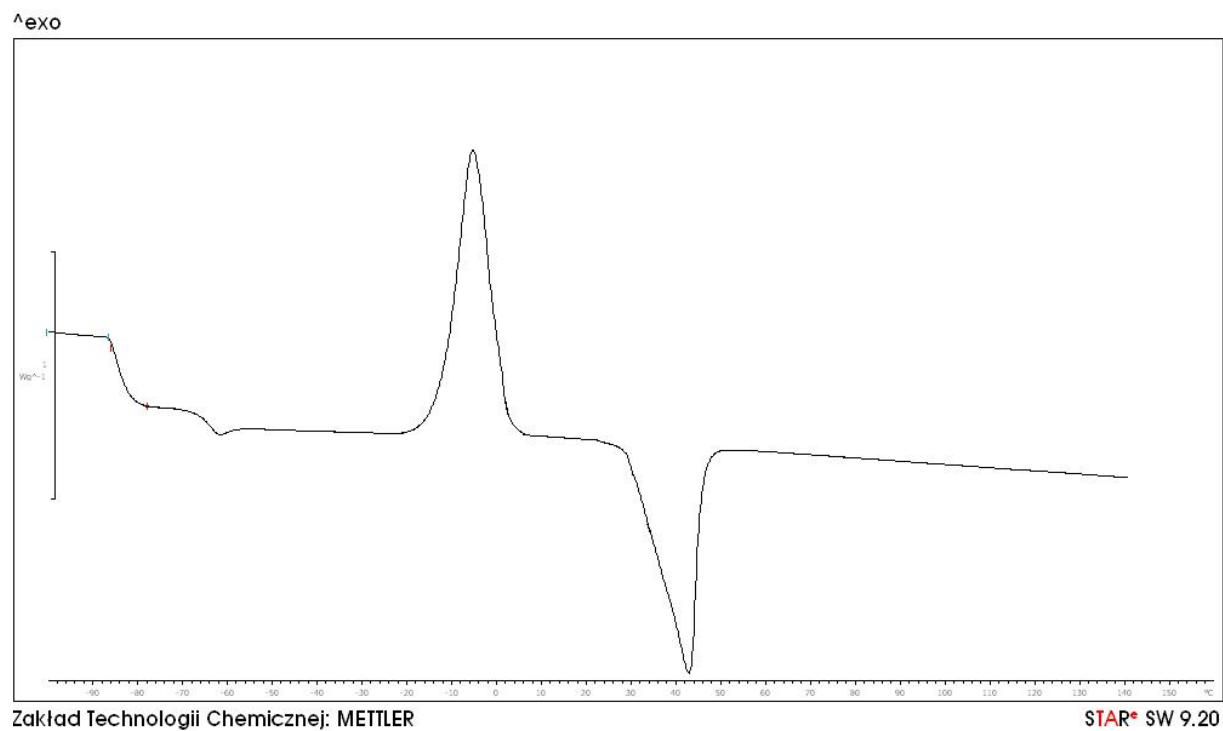

### Didecyldimethylammonium 1,2,4-triazolate (2)

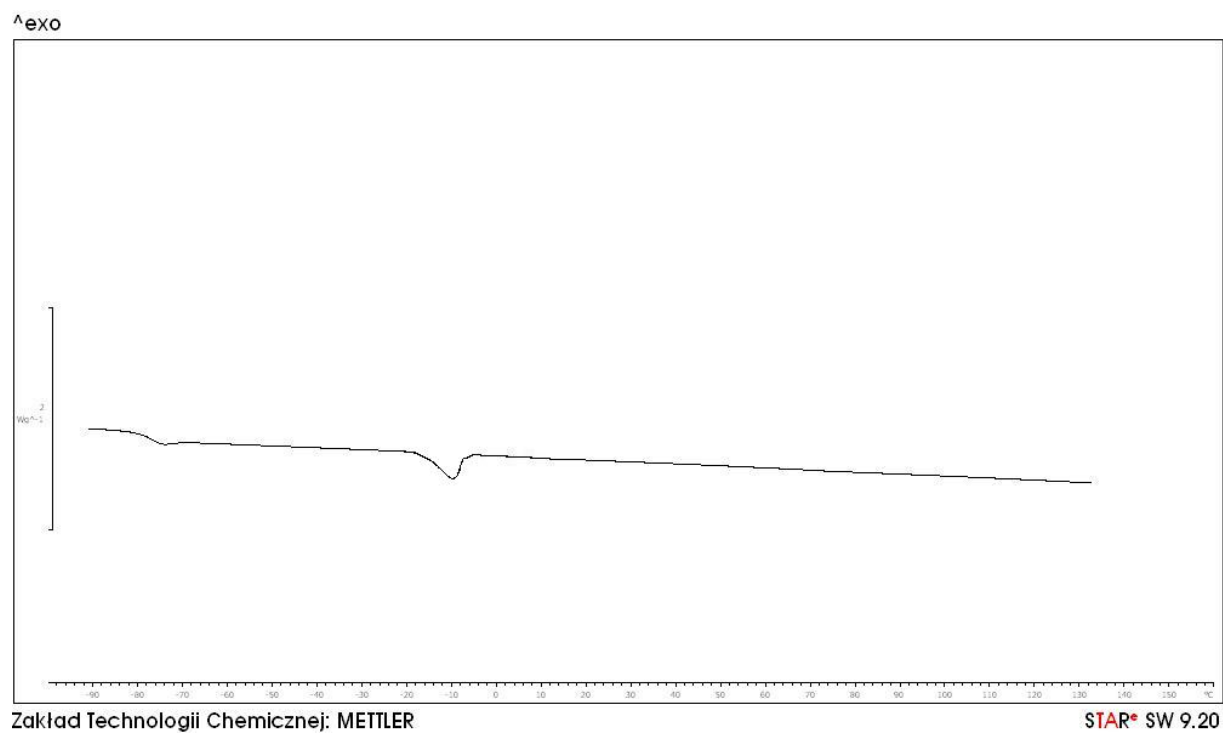

### Didecyldimethylammonium 4-nitroimidazolate (3)

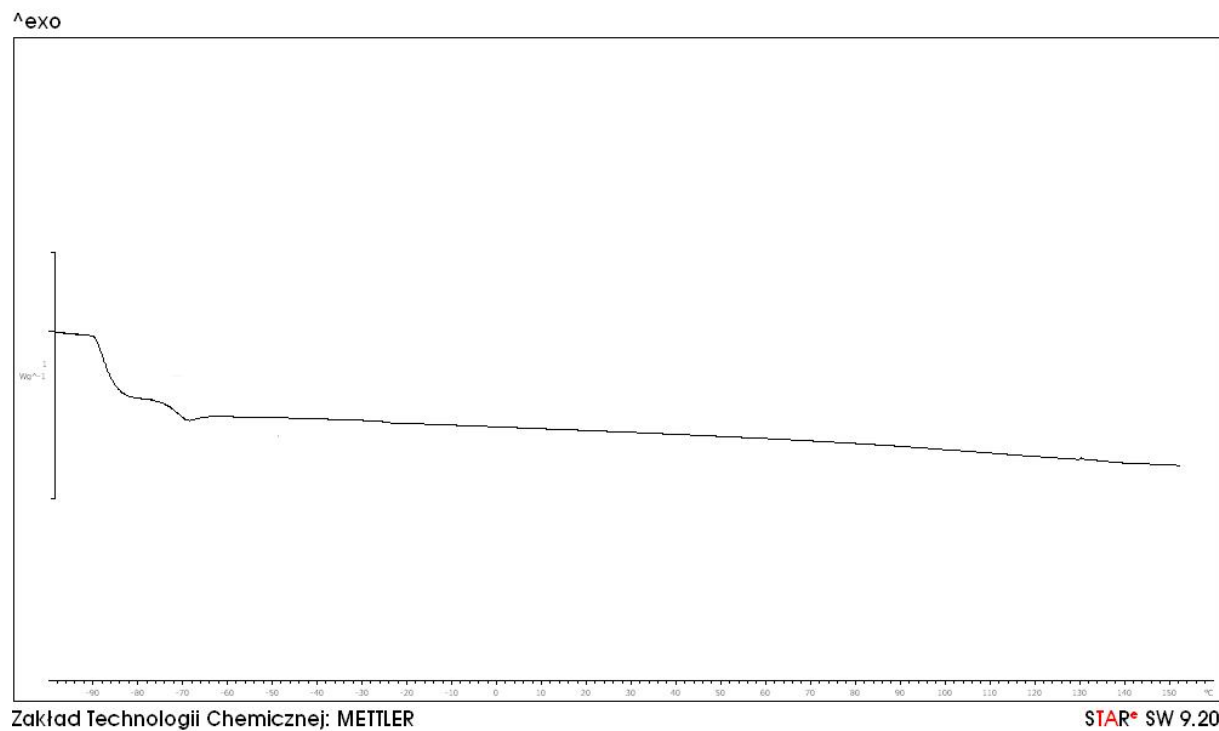

Zakład Technologii Chemicznej; METTLER

### Didecyldimethylammonium 2-methyl-4-nitroimidazolate (4)

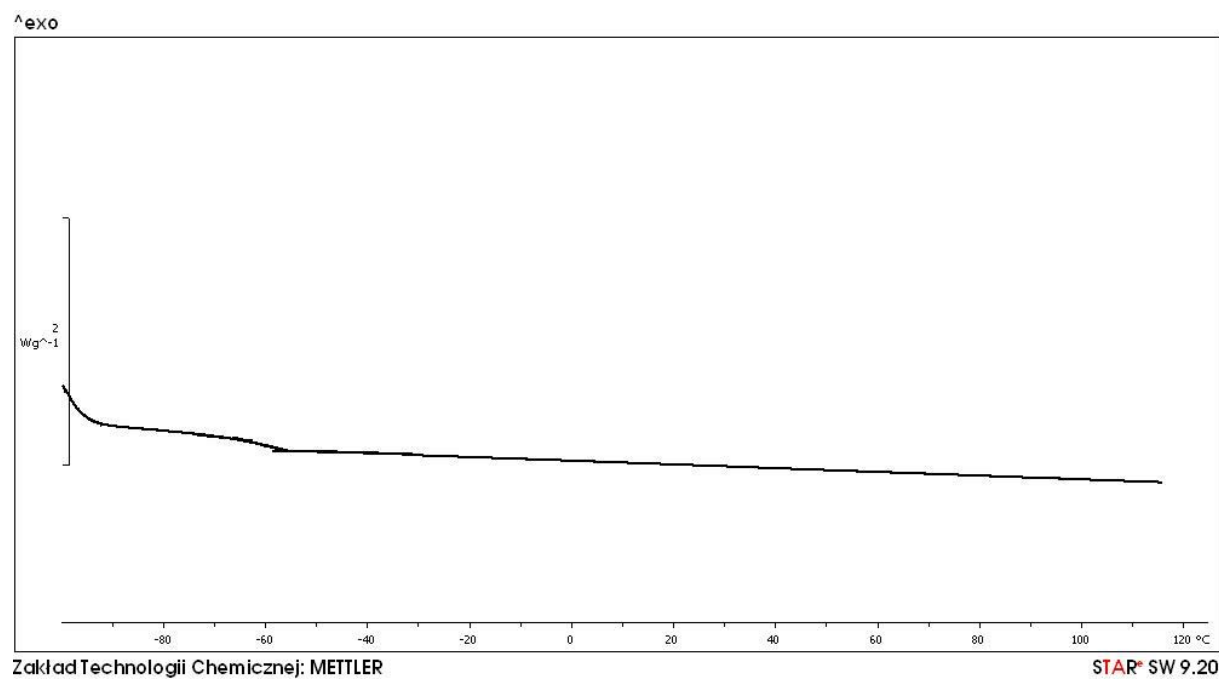

Zakład Technologii Chemicznej; METTLER

### Benzalkonium benzotriazolate (5)

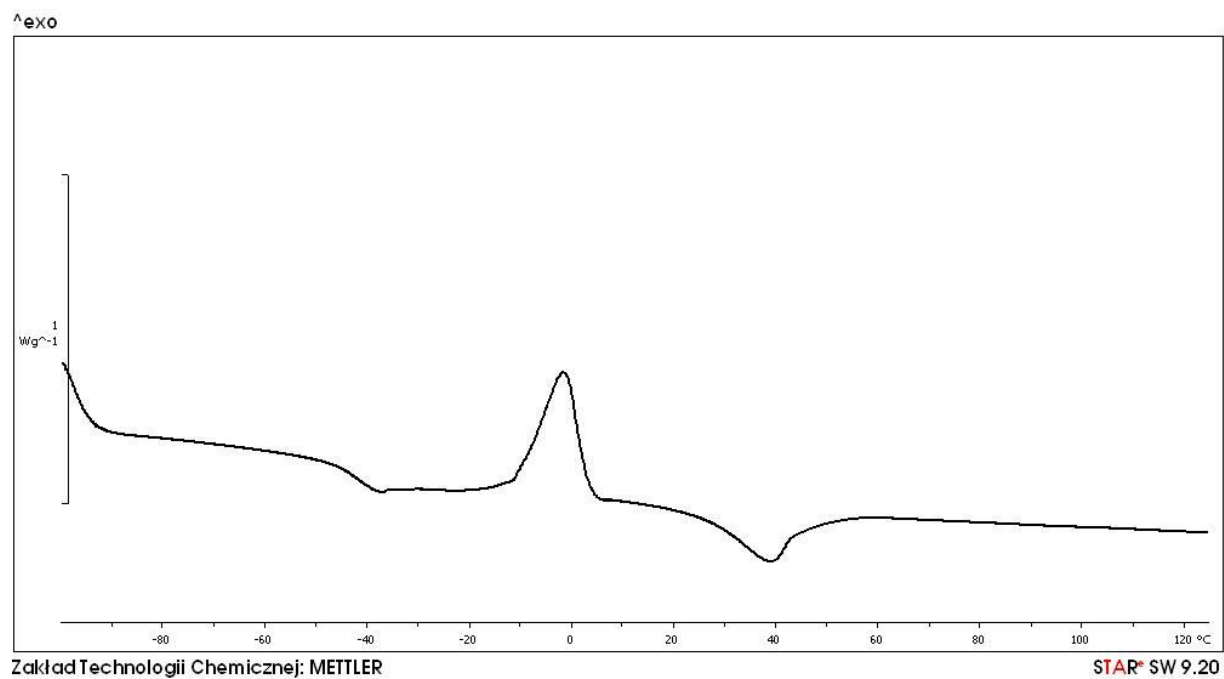

### Benzalkonium 1,2,4-triazolate (6)

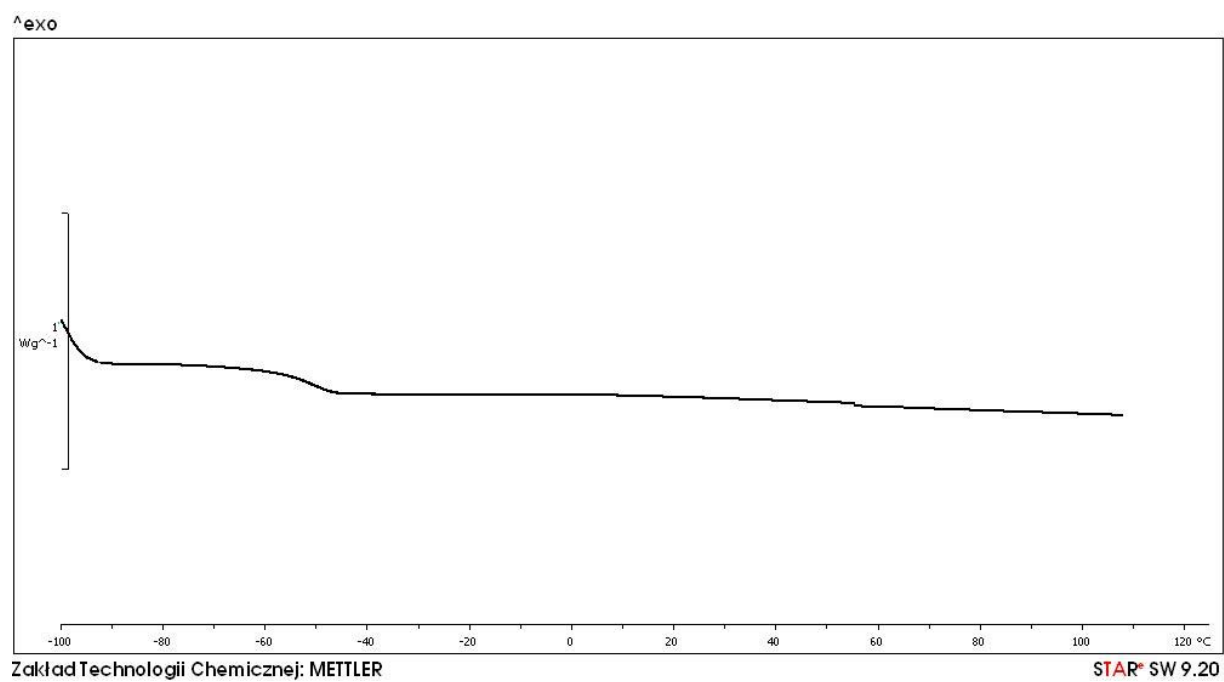

### Benzalkonium 4-nitroimidazolate (7)

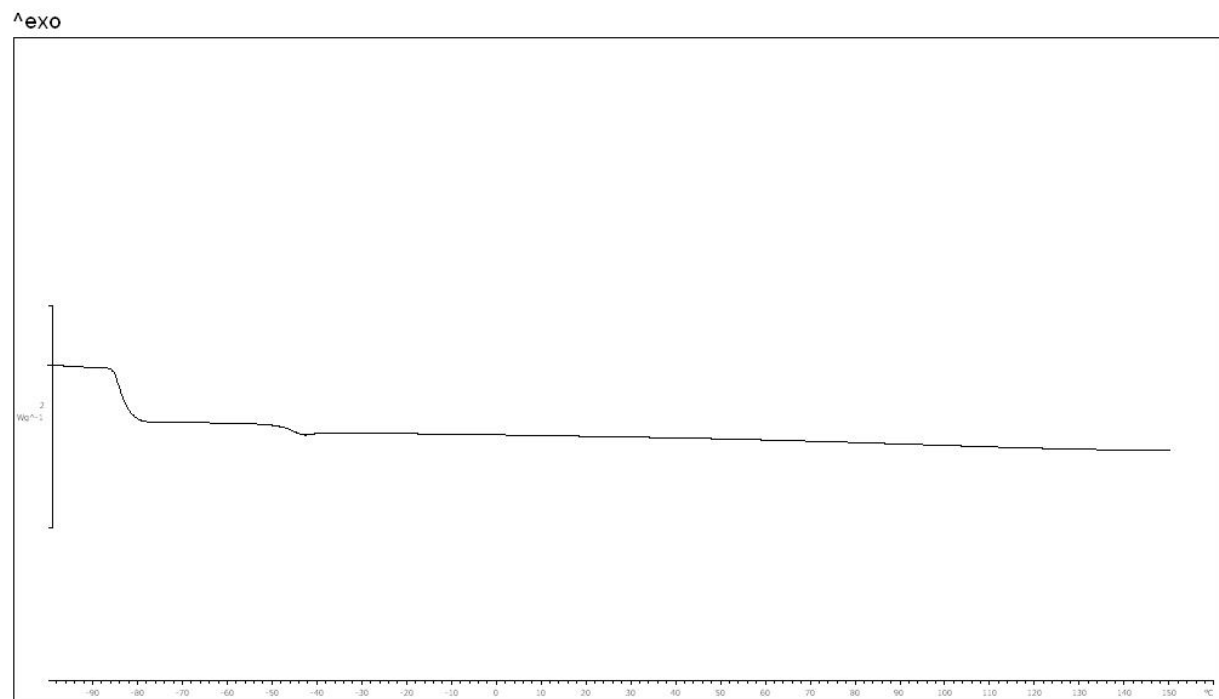

Zakład Technologii Chemicznej: METTLER

STAR® SW 9.20

### Benzalkonium 2-methyl-4-nitroimidazolate (8)

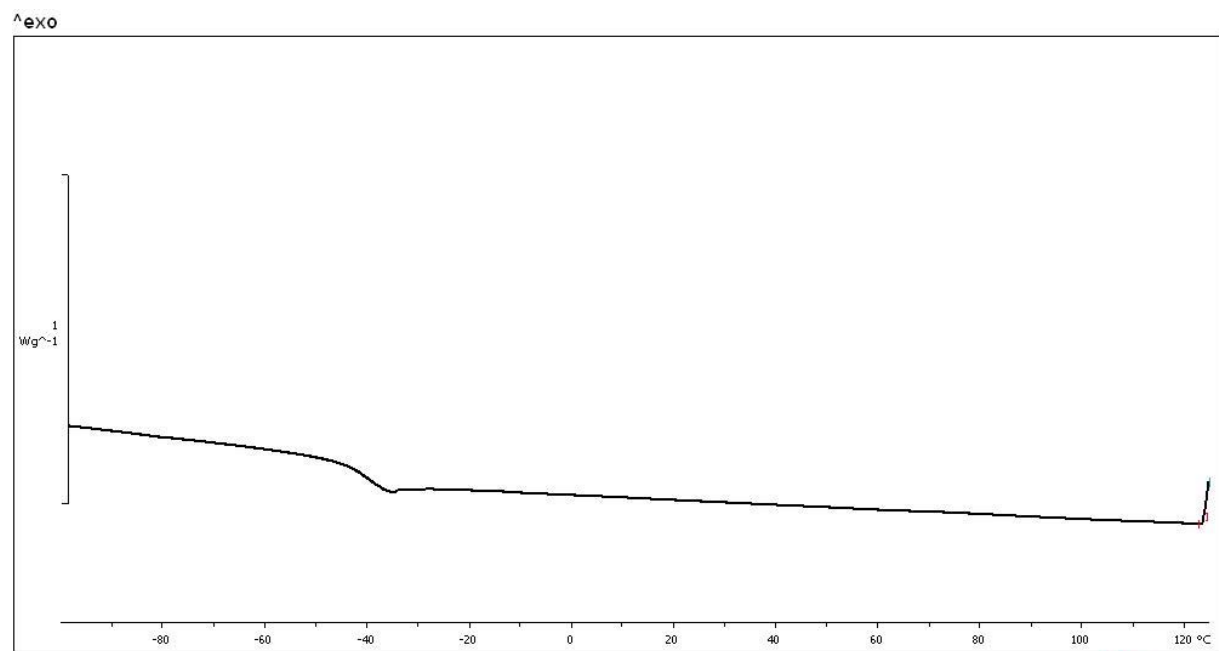

Zakład Technologii Chemicznej: METTLER

STAR® SW 9.20

### Hexadecyltrimethylammonium benzotriazolate (9)

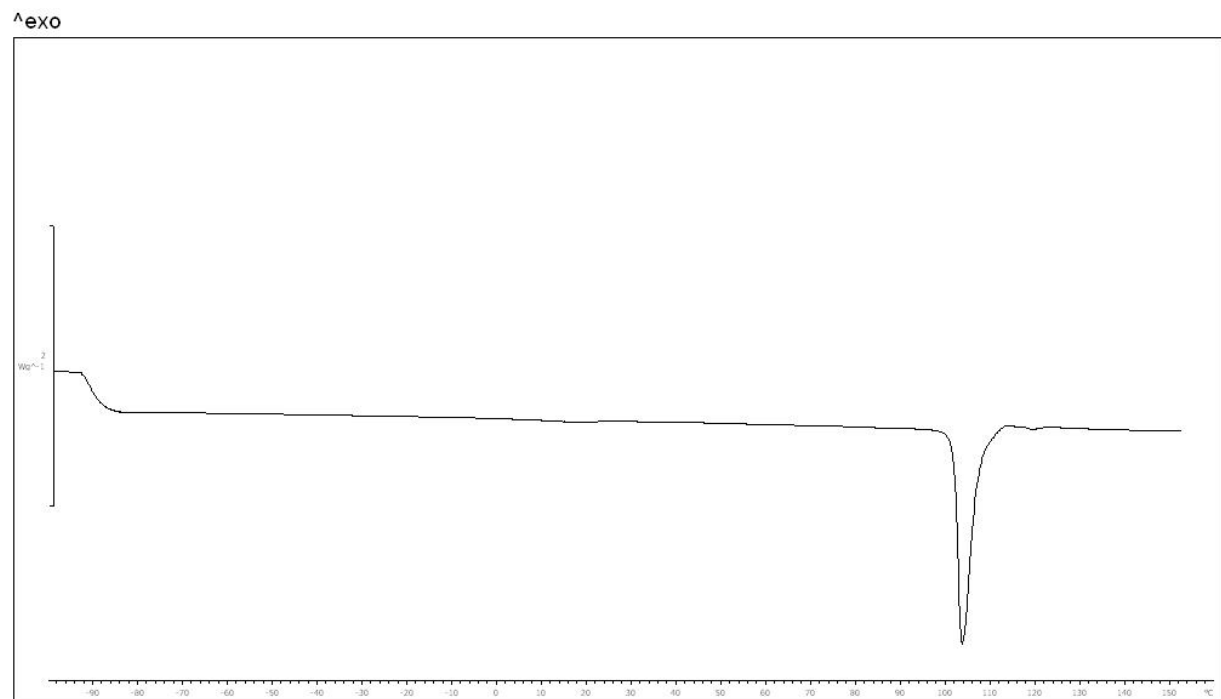

Zakład Technologii Chemicznej: METTLER

STAR® SW 9.20

### Hexadecyltrimethylammonium 1,2,4-triazolate (10)

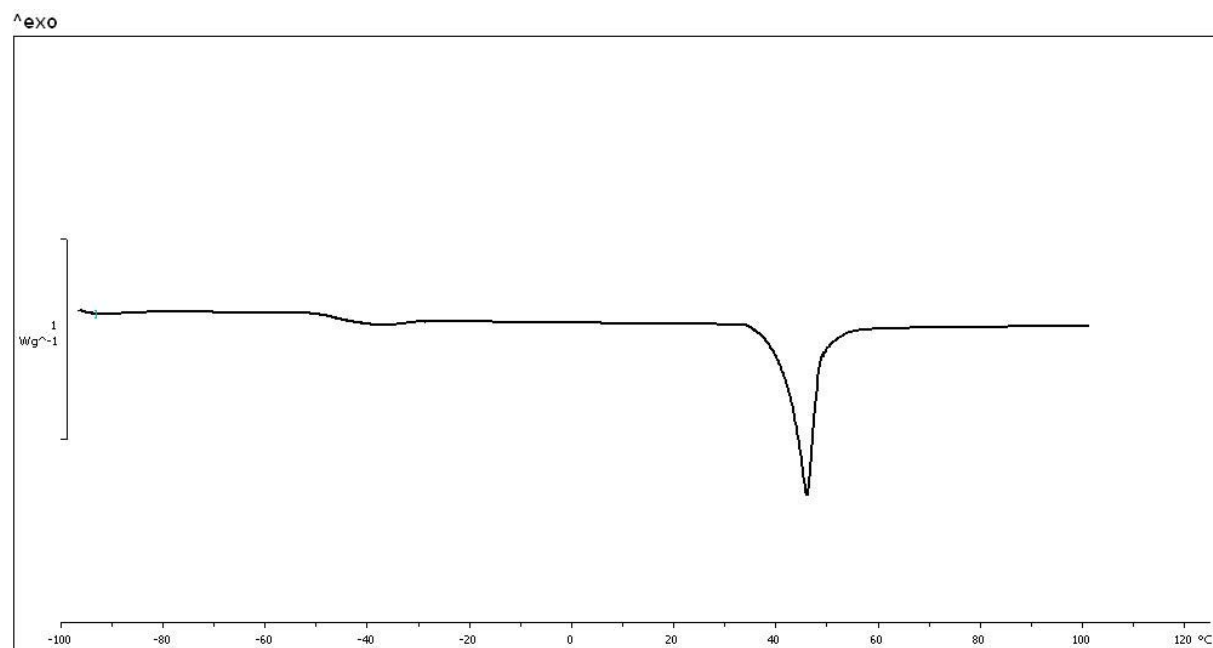

Zakład Technologii Chemicznej: METTLER

STAR® SW 9.20

### Hexadecyltrimethylammonium 4-nitroimidazolate (**11**)

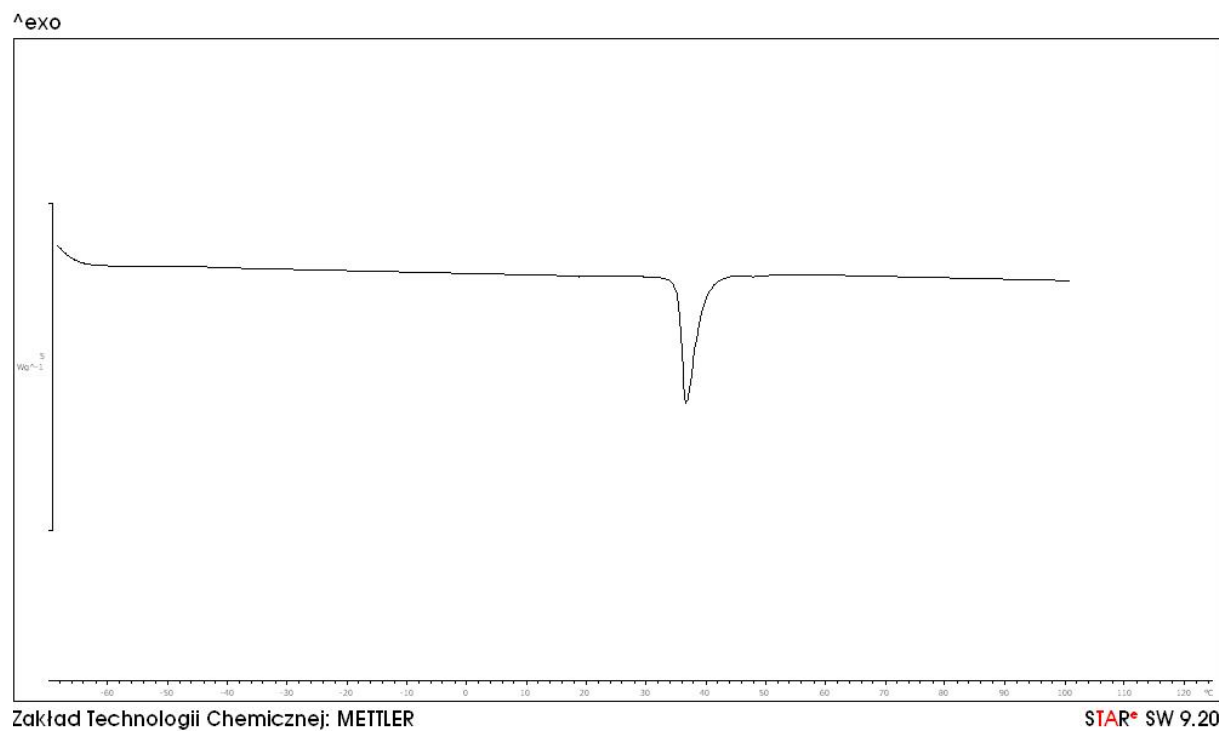

### Hexadecyltrimethylammonium 2-methyl-4-nitroimidazolate (**12**)

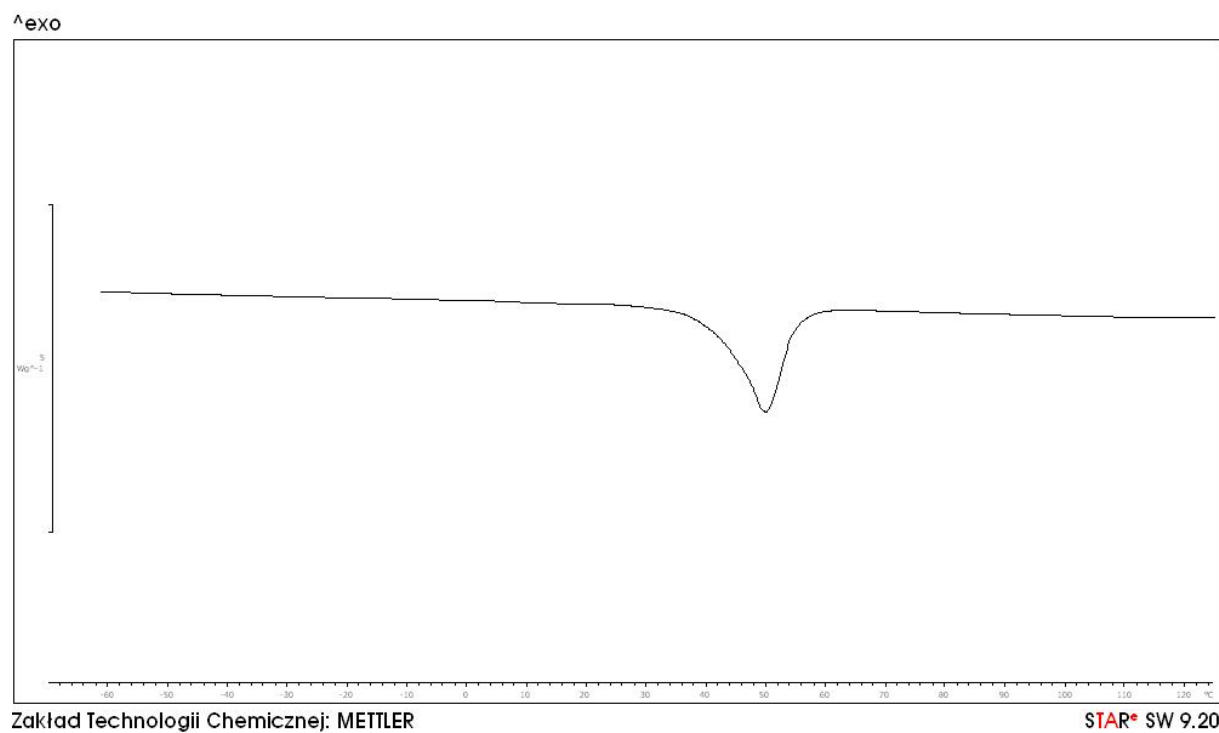

### Domiphen benzotriazolate (13)

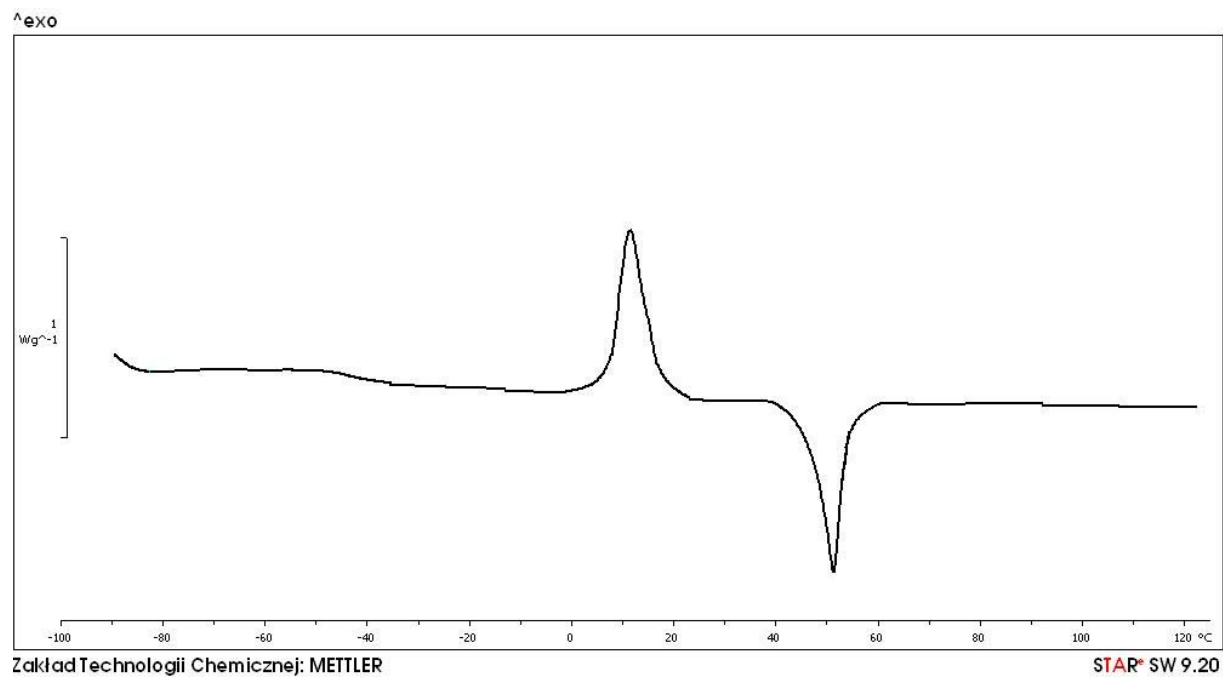

### Domiphen 1,2,4-triazolate (14)

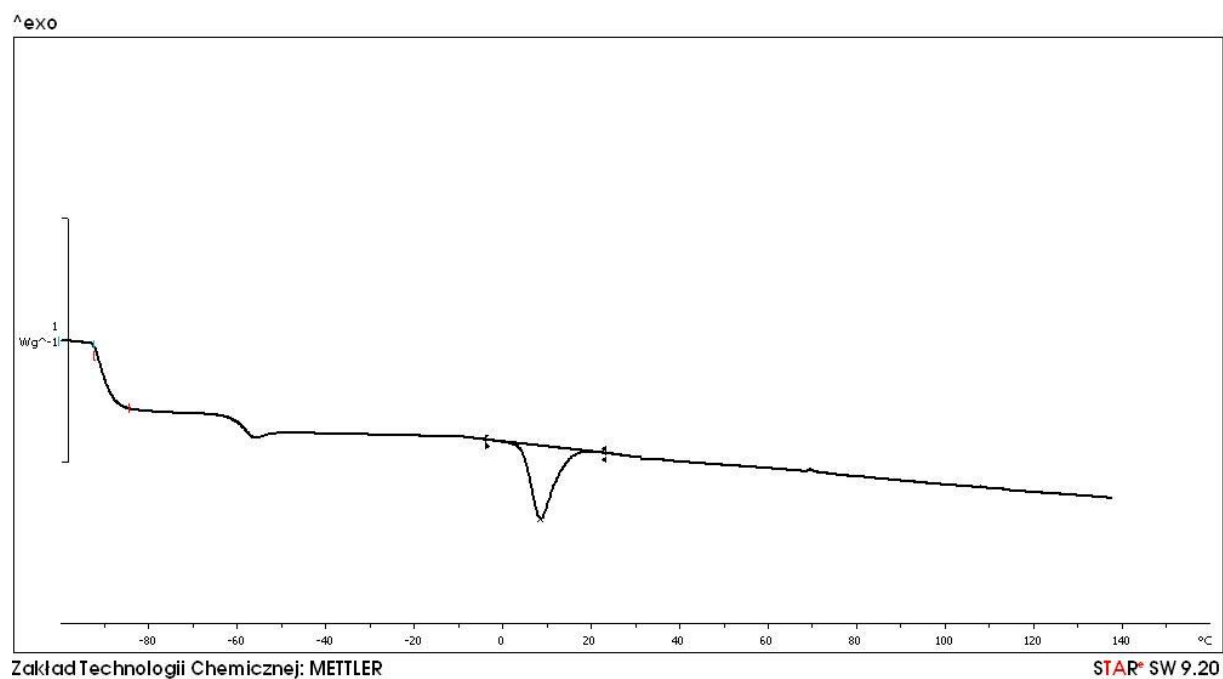

### Domiphen 4-nitroimidazolate (**15**)

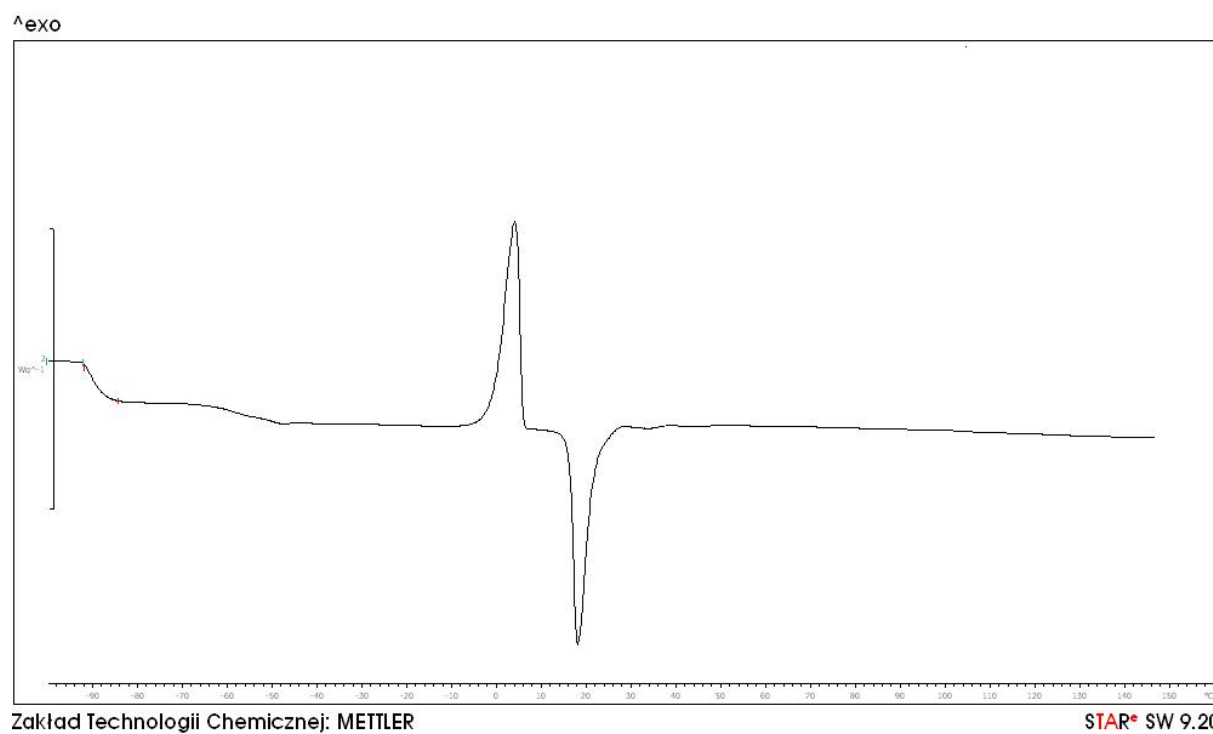

### Domiphen 2-methyl-4-nitroimidazolate (**16**)

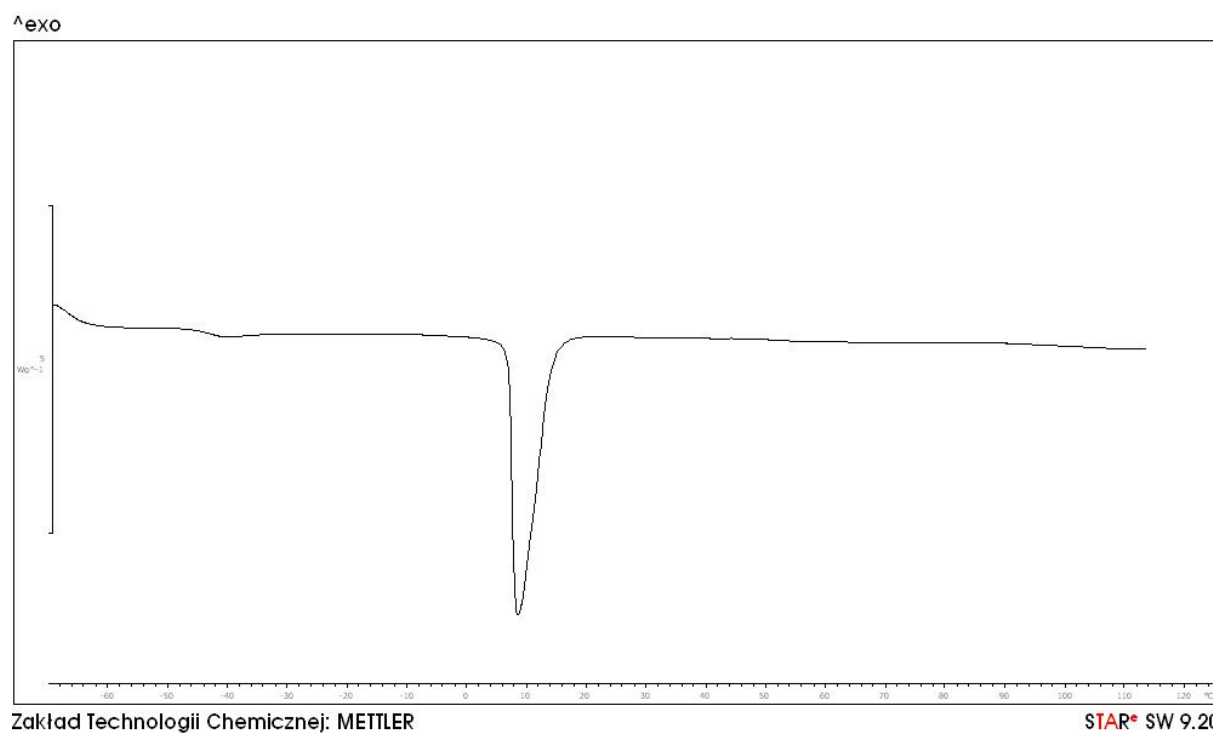



## Supporting information - TGA curves

### Didecyldimethylammonium benzotriazolate (1)

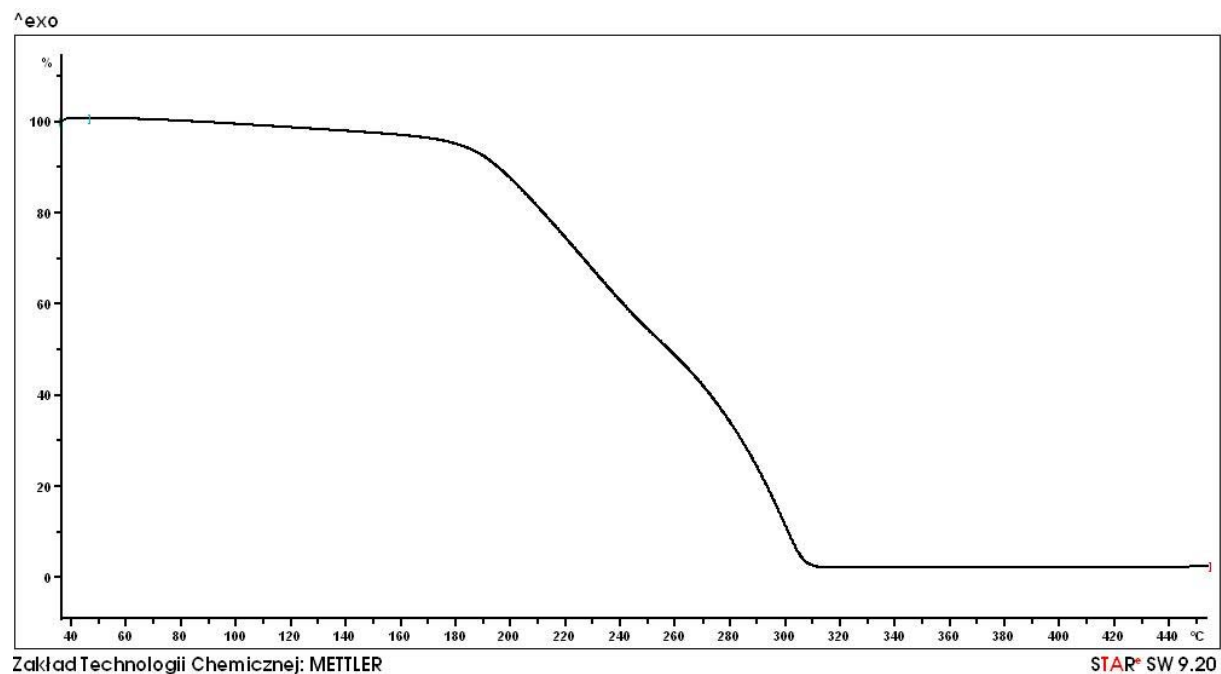

### Didecyldimethylammonium 1,2,4-triazolate (2)

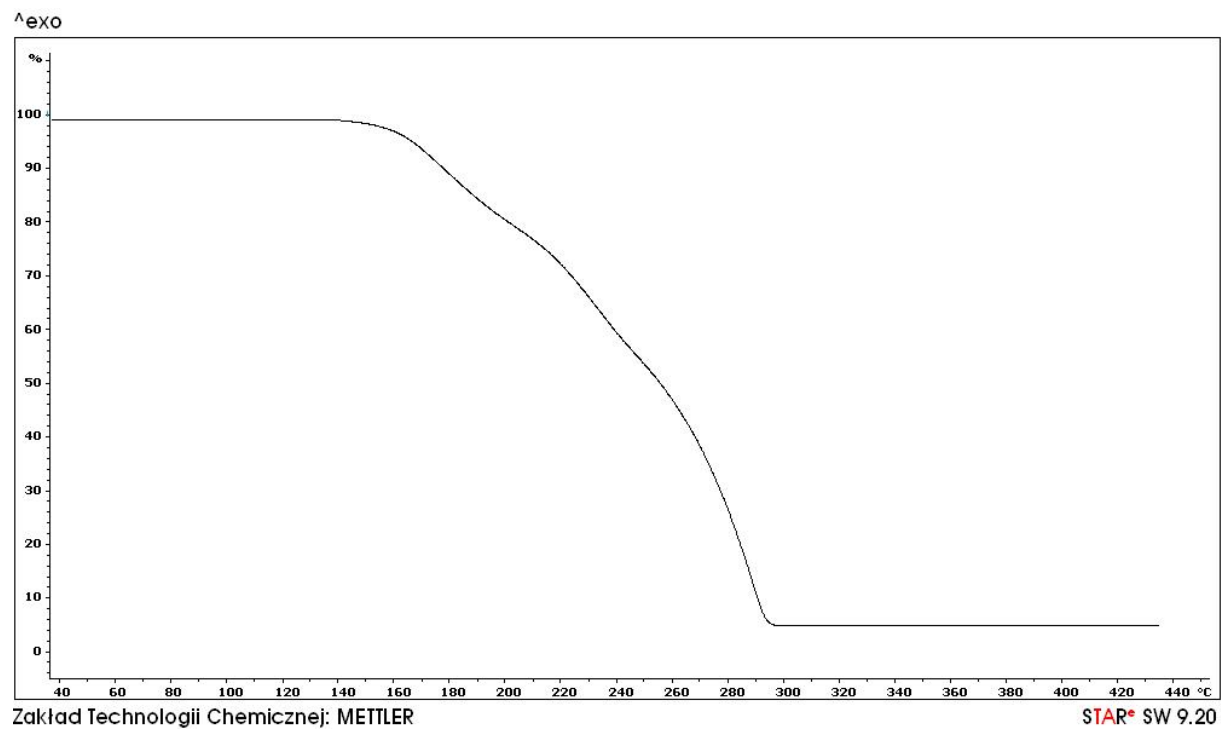

### Didecyldimethylammonium 4-nitroimidazolate (3)

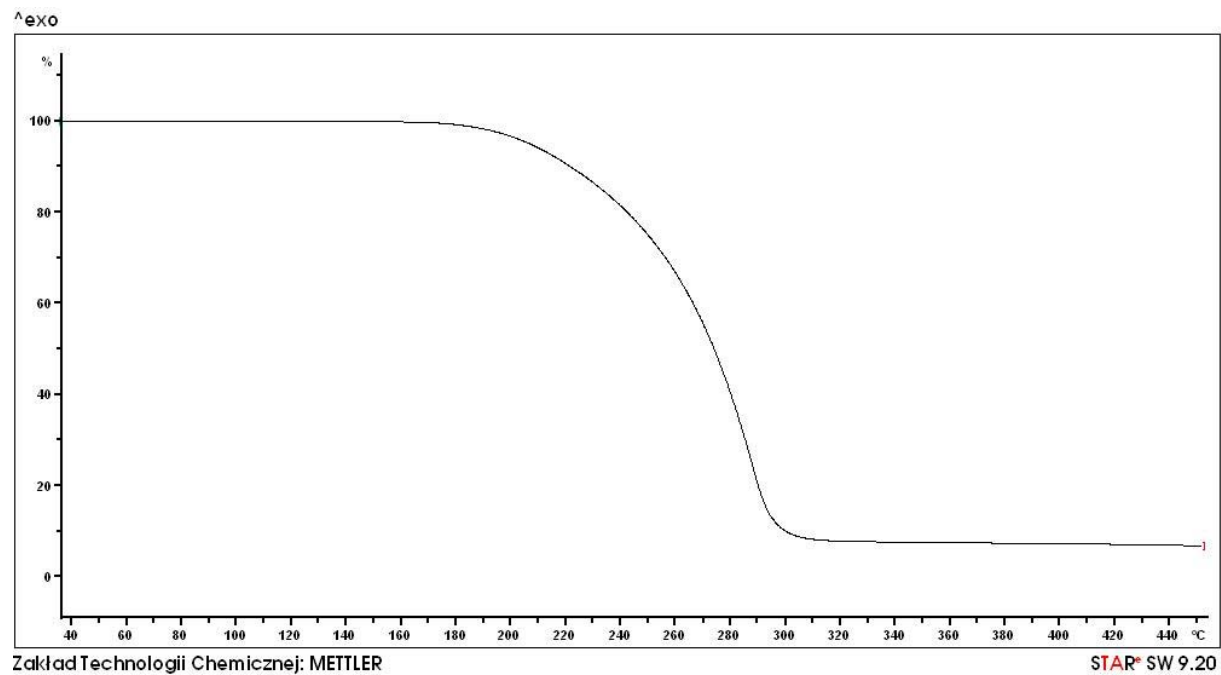

### Didecyldimethylammonium 2-methyl-4-nitroimidazolate (4)

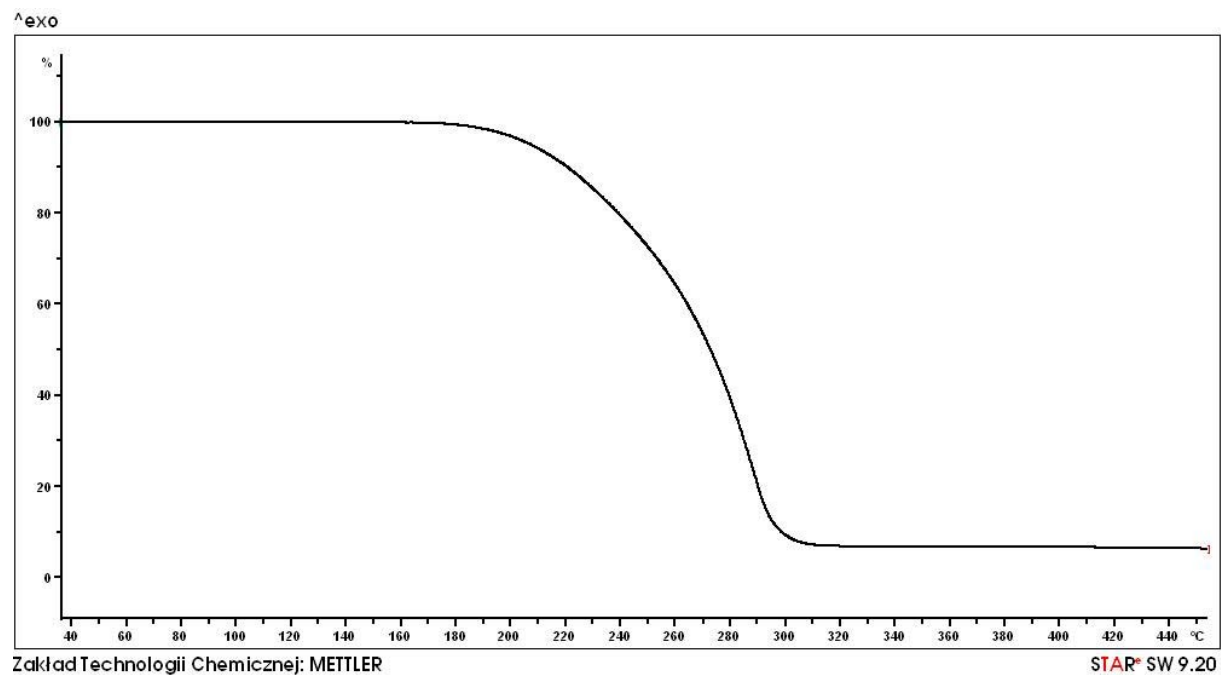

### Benzalkonium benzotriazolate (5)

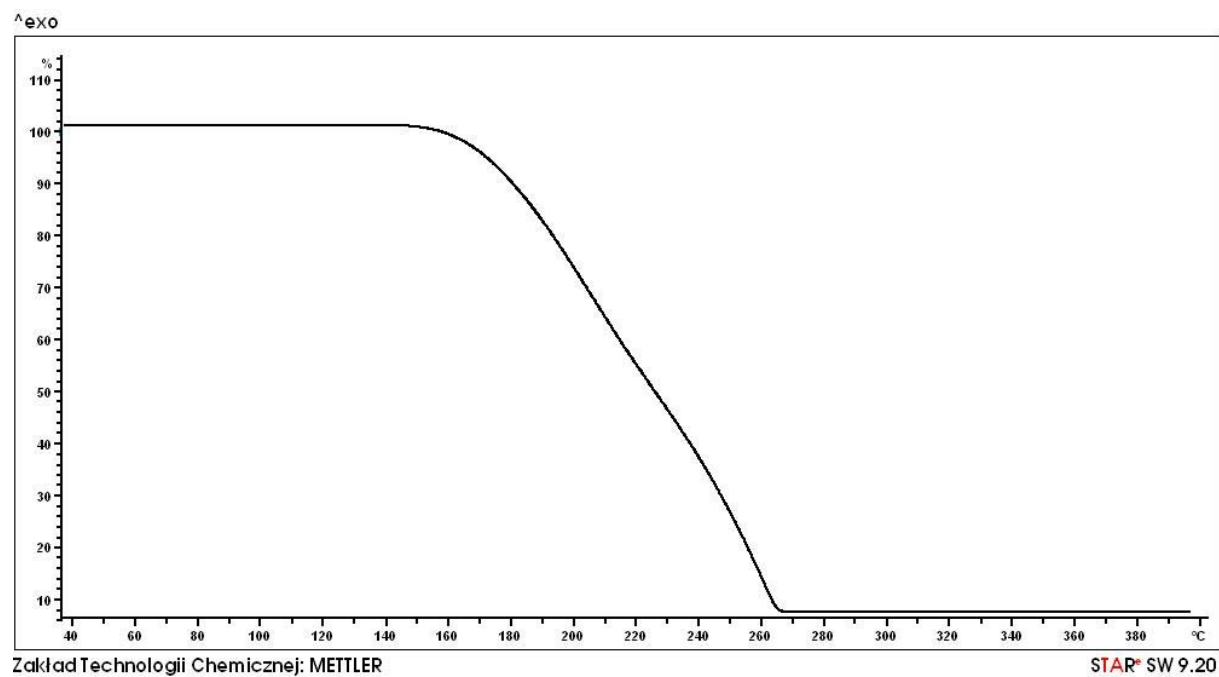

### Benzalkonium 1,2,4-triazolate (6)

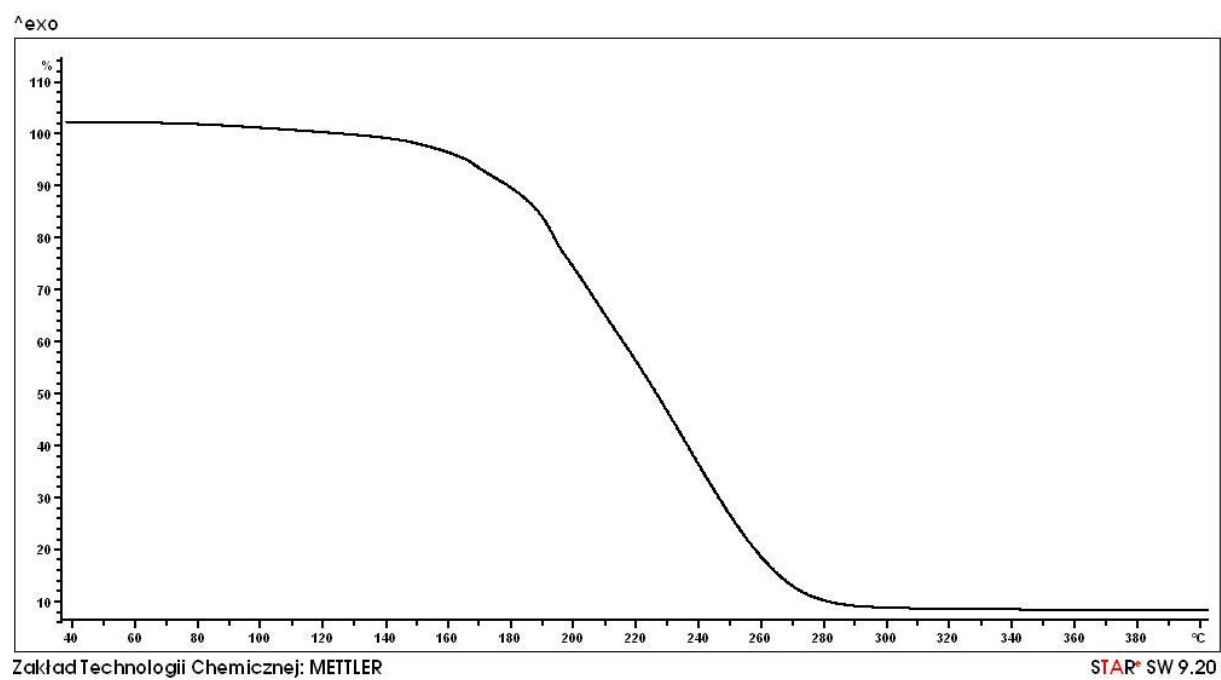

### Benzalkonium 4-nitroimidazolate (7)

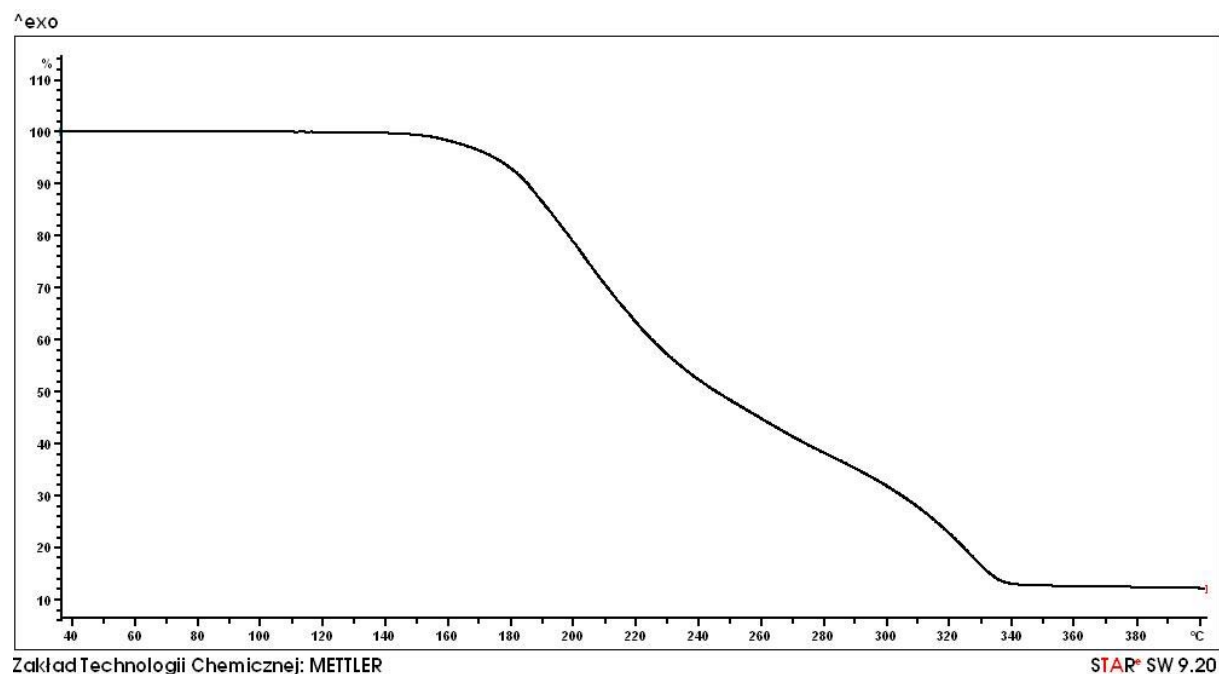

### Benzalkonium 2-methyl-4-nitroimidazolate (8)

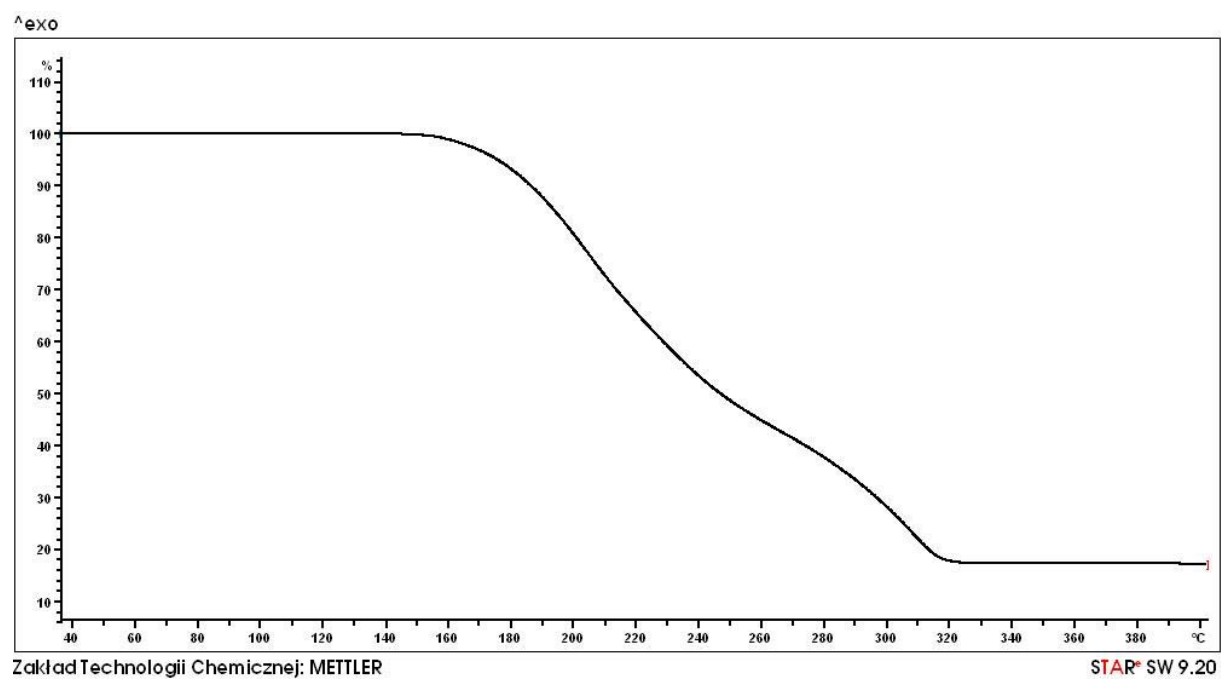

### Hexadecyltrimethylammonium benzotriazolate (9)

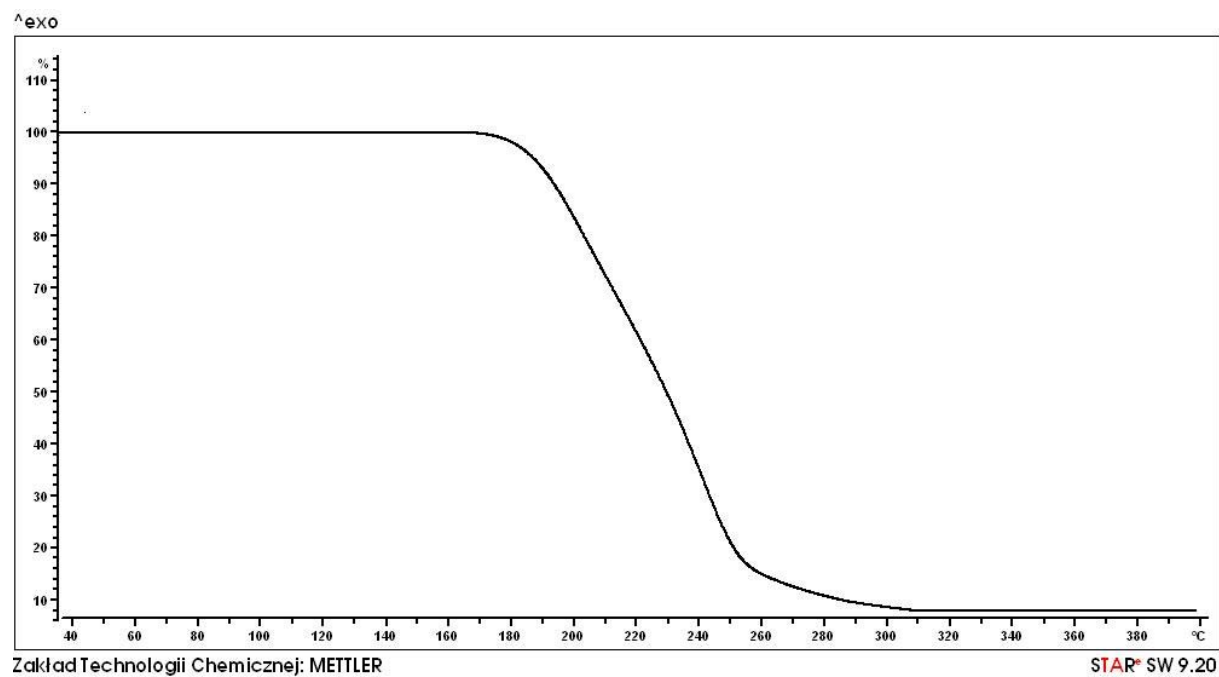

### Hexadecyltrimethylammonium 1,2,4-triazolate (10)

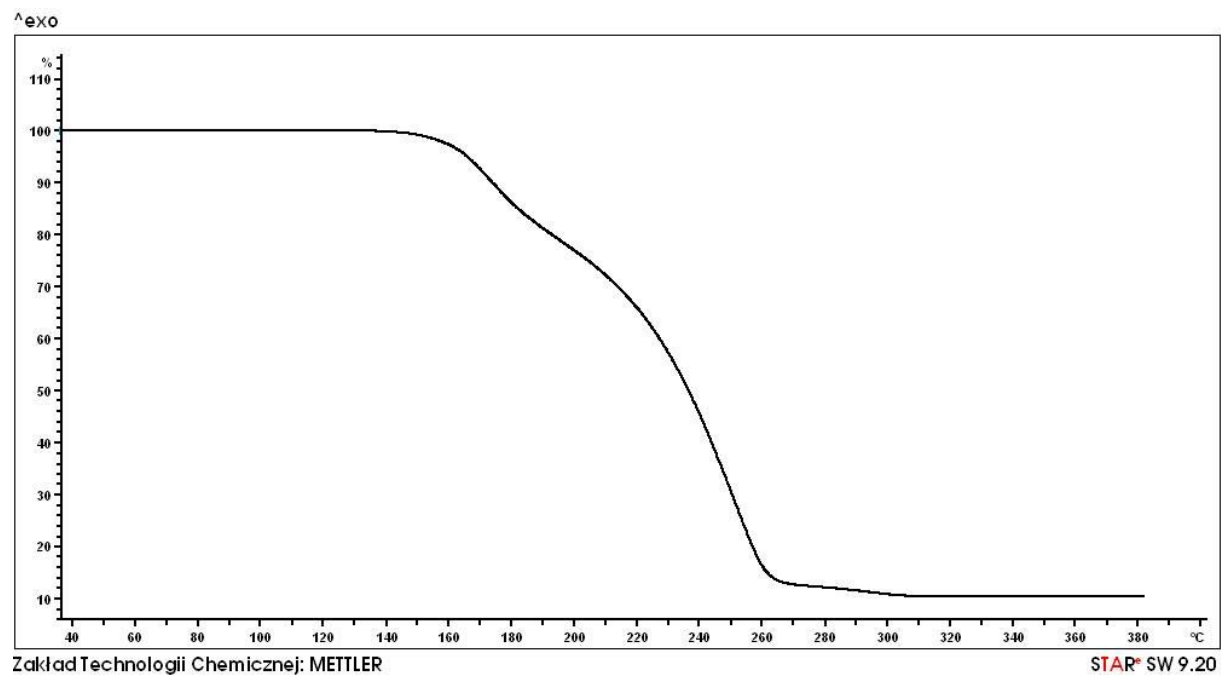

### Hexadecyltrimethylammonium 4-nitroimidazolate (**11**)

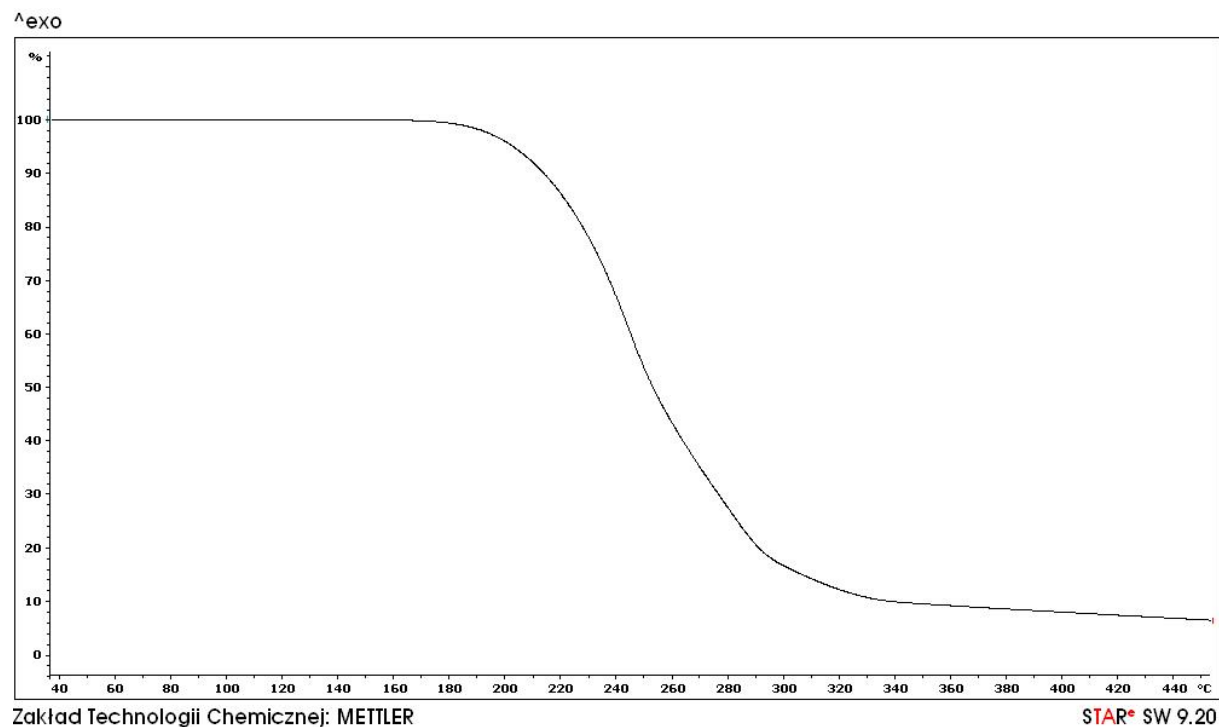

### Hexadecyltrimethylammonium 2-methyl-4-nitroimidazolate (**12**)

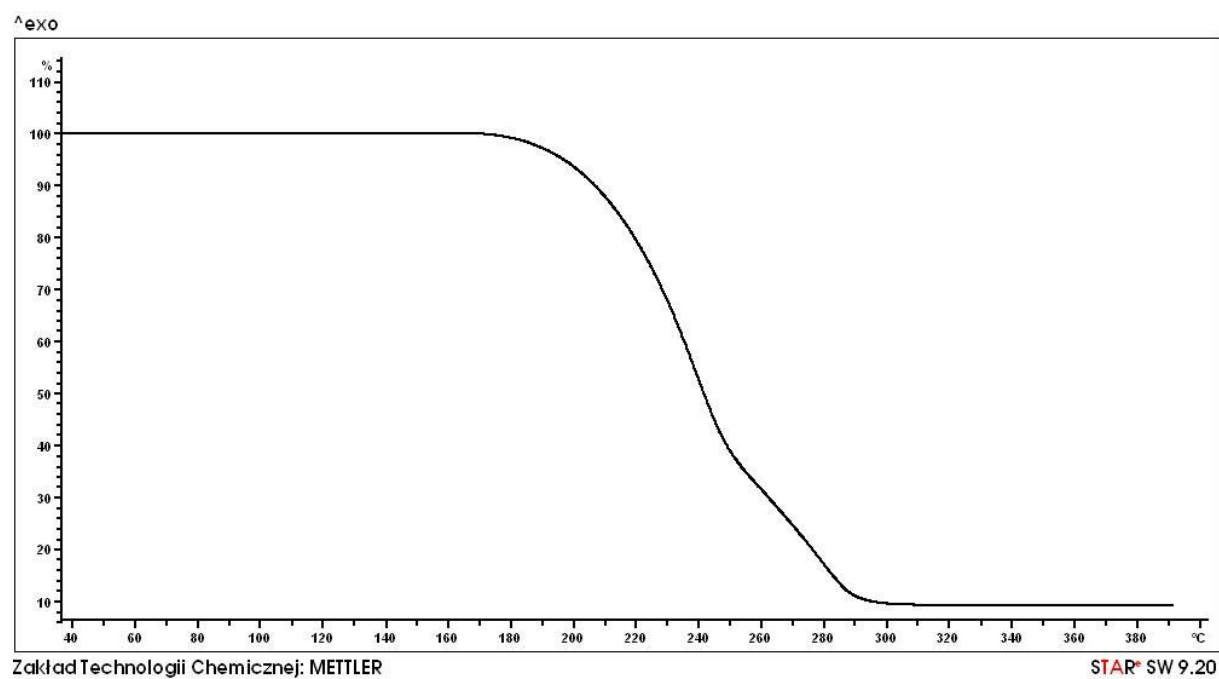

### Domiphen benzotriazolate (**13**)

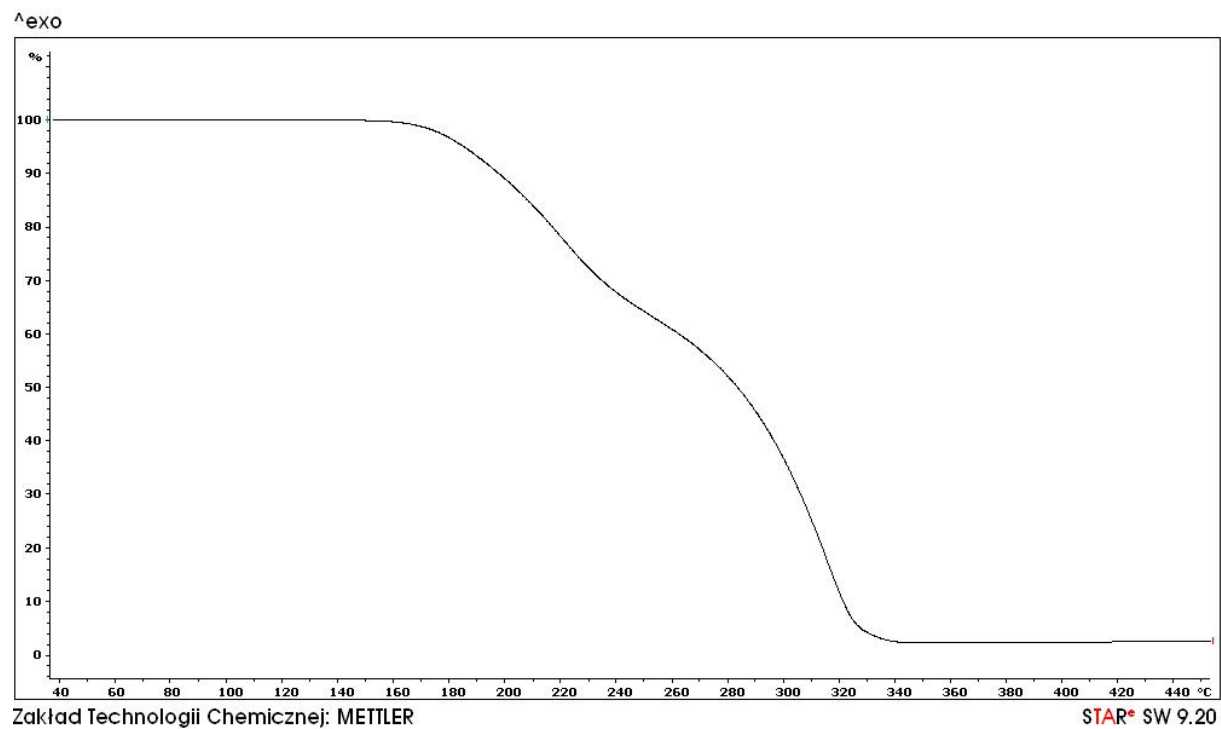

### Domiphen 1,2,4-triazolate (**14**)

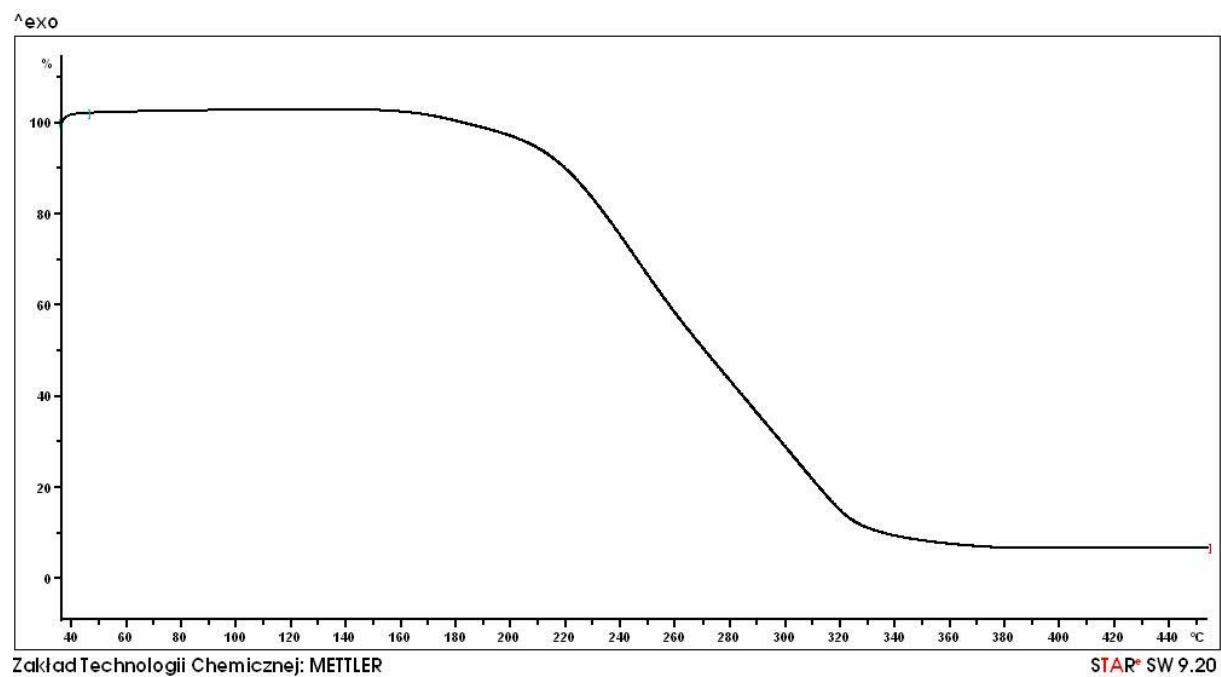

### Domiphen 4-nitroimidazolate (15)

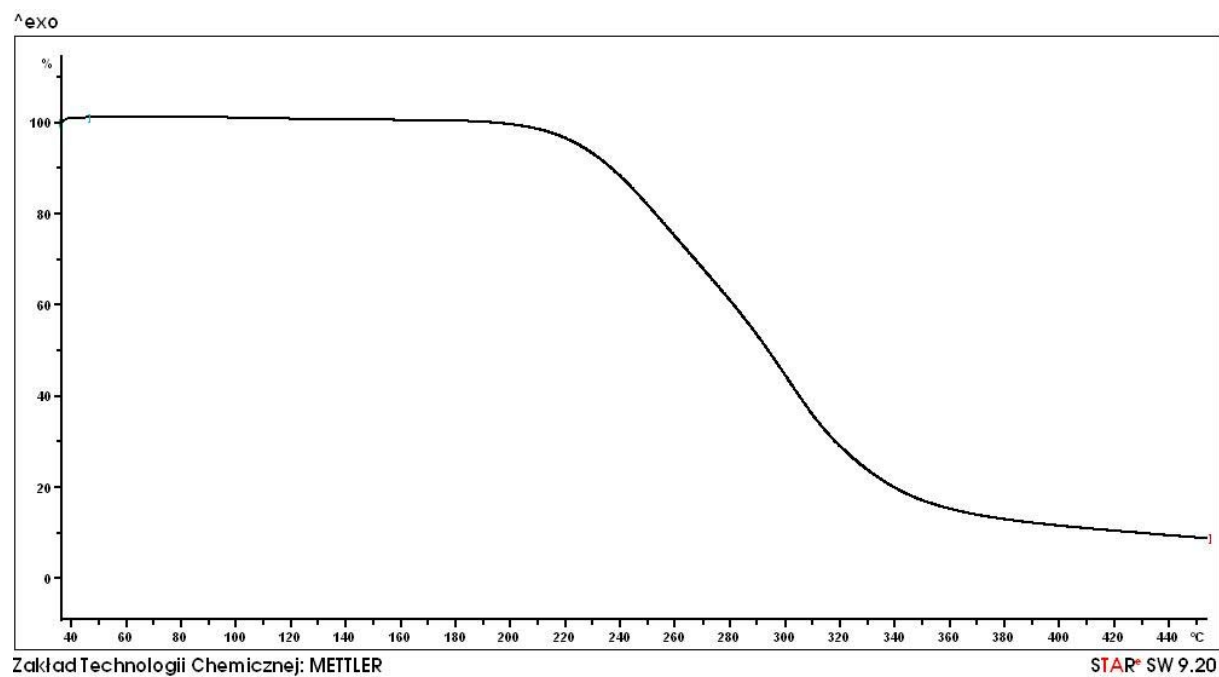

### Domiphen 2-methyl-4-nitroimidazolate (16)

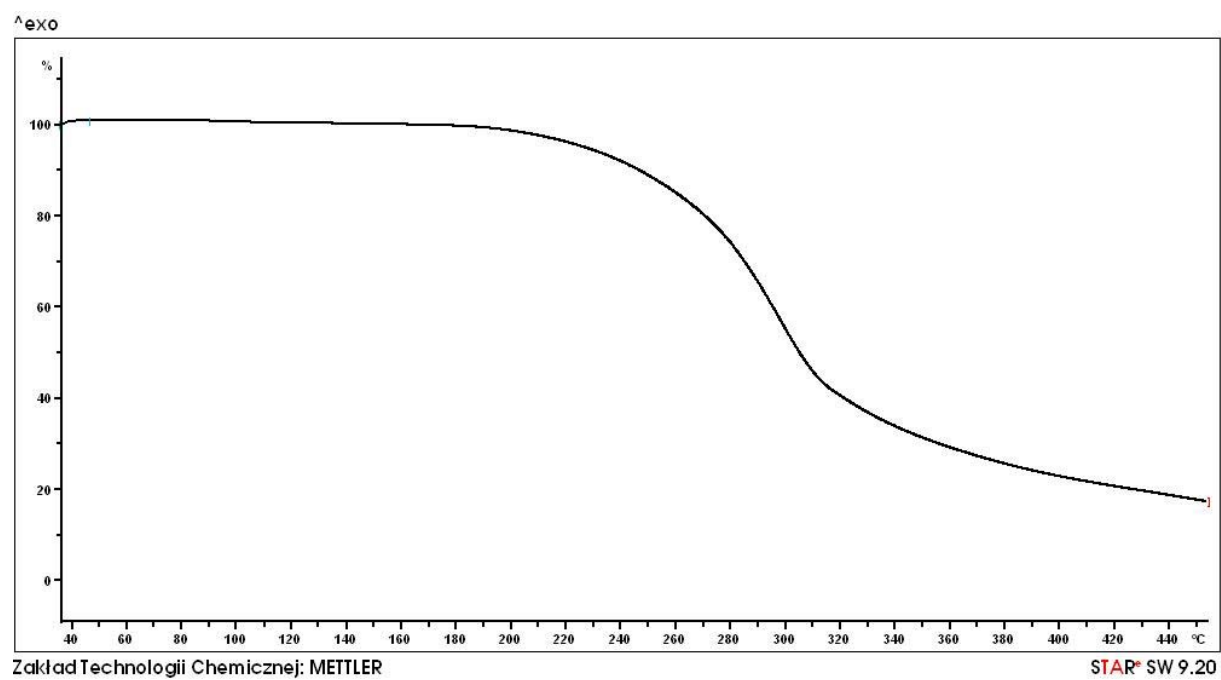

Supplement: c0nj00228c.pdf [file c0nj00228c.pdf]
